# Supplementary material for: New aspects of iron–copper crosstalk uncovered by transcriptomic characterization of Col-0 and the copper uptake mutant spl7 in Arabidopsis thaliana
Source: Royal Society of Chemistry journal article supplement (doi:10.1039/c8mt00287h), 2018-01-01
Supplement: c8mt00287h1.xlsx [file c8mt00287h1.xlsx]

## Sheet: Table S1
Table S1. SPL7-responsive genes with fold change in abundance shown in spl7 relative to WT and also within each genotype relative to the control treatment.
								Transcript abundance difference in spl7 relative to WT in each condition (log2 fold change, pairwise comparisons)									Fold-change (log2) within same genotype in each condition relative to +Fe+Cu condition
								Roots	Roots	Roots	Roots	Shoots	Shoots	Shoots	Shoots		Roots	Roots	Roots	Roots	Roots	Roots	Shoots	Shoots	Shoots	Shoots	Shoots	Shoots
	elements	Gene name	Description		Fit regulated	SPL7 regulated	No. GTAC	+Fe+Cu	-Fe	-Cu	-Fe-Cu	+Fe+Cu	-Fe	-Cu	-Fe-Cu		WT-Fe	WT-Cu	WT-Fe-Cu	spl7-Fe	spl7-Cu	spl7-Fe-Cu	WT-Fe	WT-Cu	WT-Fe-Cu	spl7-Fe	spl7-Cu	spl7-Fe-Cu
	AT5G18830	SPL7	squamosa promoter binding protein-like 7 Encodes a member of the Squamosa Binding Protein family of transcriptional regulators. SPL7 is expressed highly in roots and appears to play a role in copper homeostasis. Mutants are hypersensitive to copper deficient conditions and display a retarded growth phenotype. SPL7 binds to the promoter of the copper responsive miRNAs miR398b and miR389c. squamosa…	.				-1.48737	-1.47751	-1.36266	-1.40246	-1.17846	-1.22604	-1.27568	-1.22347
Known SPL7 responsive genes
	AT3G56240	CCH	copper chaperone CCH protein belongs to a family of eukaryotic proteins that participate in intracellular copper homeostasis by delivering this metal to the secretory pathway; mainly located along the vascular bundles of senescing leaves and petioles as well as in stem sieve elements; hypothesized to have a role in copper mobilization from decaying organs towards reproductive structures, as a res…	.	Yes	Yes	4	-1.19733		-2.45151	-1.24805			-1.57965				1.40754					-1.0518
	AT3G46900	COPT2	copper transporter 2 encodes a member of copper transporter family and functionally complements a high affinity copper transporter mutant in yeast copper transporter 2 (COPT2); FUNCTIONS IN: copper ion transmembrane transporter activity, high affinity copper ion transmembrane transporter activity; INVOLVED IN: copper ion transport, high-affinity copper ion transport; LOCATED IN: anchored to plasm…	.	Yes	Yes	3	-3.37089		-4.76112				-2.0444	-1.65716			2.0469		2.55946		2.39481
	AT5G38820		Transmembrane amino acid transporter family protein Encodes a putative amino acid transporter. Transmembrane amino acid transporter family protein; CONTAINS InterPro DOMAIN/s: Amino acid transporter, transmembrane (InterPro:IPR013057); BEST Arabidopsis thaliana protein match is: Transmembrane amino acid transporter family protein (TAIR:AT3G30390.2); Has 4324 Blast hits to 4257 proteins in 375 spe…	.	Yes	Yes	2	-1.2607	-1.81485	3.1638	3.95325						2.12936	-4.36447	-2.26688	1.57267		2.94734
	AT4G29780		unknown protein; BEST Arabidopsis thaliana protein match is: unknown protein (TAIR:AT5G12010.1); Has 945 Blast hits to 944 proteins in 87 species: Archae - 0; Bacteria - 0; Metazoa - 519; Fungi - 43; Plants - 365; Viruses - 0; Other Eukaryotes - 18 (source: NCBI BLink). |	.	Yes	Yes	6	-1.10655	1.4217			-3.25574		-1.72733	1.42054		-1.53214		-1.65242				-2.79044	-1.49186	-3.49616	1.00002		1.18199
	AT1G47395	IMA2/FEP2	IMA2/FEP2; FUNCTIONS IN: molecular_function unknown; INVOLVED IN: biological_process unknown; LOCATED IN: endomembrane system; BEST Arabidopsis thaliana protein match is: unknown protein (TAIR:AT1G47400.1); Has 9 Blast hits to 9 proteins in 2 species: Archae - 0; Bacteria - 0; Metazoa - 0; Fungi - 0; Plants - 9; Viruses - 0; Other Eukaryotes - 0 (source: NCBI BLink). |	.		Yes	9	-1.20378	2.60061	2.65446	3.22087	-5.14777	3.80542	3.89426	3.05245			-4.09676	-2.24049	4.70972		2.18233	3.11048	-3.97409		12.0474	5.0789	7.40071
	AT1G52690		Late embryogenesis abundant protein (LEA) family protein Late embryogenesis abundant protein (LEA) family protein; BEST Arabidopsis thaliana protein match is: Late embryogenesis abundant protein (LEA) family protein (TAIR:AT3G15670.1); Has 35333 Blast hits to 34131 proteins in 2444 species: Archae - 798; Bacteria - 22429; Metazoa - 974; Fungi - 991; Plants - 531; Viruses - 0; Other Eukaryotes - 9…	.		Yes	6					7.19721		1.50965			2.28075			2.70329						-6.92005	-3.68456	-7.42265
	AT1G71200	CITF1	CITF1; basic helix-loop-helix (bHLH) DNA-binding superfamily protein basic helix-loop-helix (bHLH) DNA-binding superfamily protein; FUNCTIONS IN: DNA binding, sequence-specific DNA binding transcription factor activity; INVOLVED IN: regulation of transcription; LOCATED IN: nucleus; CONTAINS InterPro DOMAIN/s: Helix-loop-helix DNA-binding domain (InterPro:IPR001092), Helix-loop-helix DNA-binding (…	.		Yes	9	-5.55497		-7.20734	-5.53825							3.75345
	AT2G24850	TAT3	tyrosine aminotransferase 3 Encodes a tyrosine aminotransferase that is responsive to treatment with jasmonic acid. tyrosine aminotransferase 3 (TAT3); CONTAINS InterPro DOMAIN/s: 1-aminocyclopropane-1-carboxylate synthase (InterPro:IPR001176), Aminotransferase, class I/classII (InterPro:IPR004839), Pyridoxal phosphate-dependent transferase, major domain (InterPro:IPR015424), Tyrosine transaminas…	.		Yes	6	3.21059		2.20109		1.38811		2.40276	2.03645							-2.31298		-1.00305	-1.18729
	AT2G29130	LAC2	laccase 2 putative laccase, knockout mutant had reduced root elongation under PEG-induced dehydration laccase 2 (LAC2); FUNCTIONS IN: laccase activity; INVOLVED IN: response to water deprivation; LOCATED IN: endomembrane system, apoplast; EXPRESSED IN: 6 plant structures; EXPRESSED DURING: petal differentiation and expansion stage; CONTAINS InterPro DOMAIN/s: Multicopper oxidase, type 3 (InterPro…	.		Yes	4						2.01336		1.31252					-1.22588				-1.20462	-1.33977	1.33043	-1.57806
	AT2G47010		unknown protein; FUNCTIONS IN: molecular_function unknown; INVOLVED IN: biological_process unknown; LOCATED IN: endomembrane system; EXPRESSED IN: 17 plant structures; EXPRESSED DURING: 10 growth stages; BEST Arabidopsis thaliana protein match is: unknown protein (TAIR:AT1G17030.1); Has 72 Blast hits to 72 proteins in 13 species: Archae - 0; Bacteria - 0; Metazoa - 0; Fungi - 0; Plants - 71; Viru…	.		Yes	5	-1.27563		-3.33576				-1.25918				1.44381
	AT3G28510		P-loop containing nucleoside triphosphate hydrolases superfamily protein P-loop containing nucleoside triphosphate hydrolases superfamily protein; FUNCTIONS IN: nucleoside-triphosphatase activity, ATPase activity, nucleotide binding, ATP binding; EXPRESSED IN: 7 plant structures; EXPRESSED DURING: LP.06 six leaves visible, LP.04 four leaves visible, 4 anthesis, 4 leaf senescence stage; CONTAINS I…	.		Yes	6		2.03115		1.28246		1.2254	2.62307	2.63738		-1.68583		-2.03951						-2.71319	2.06694
	AT3G57260	BGL2	beta-1,3-glucanase 2 beta 1,3-glucanase "beta-1,3-glucanase 2" (BGL2); FUNCTIONS IN: glucan 1,3-beta-glucosidase activity, protein binding, cellulase activity, hydrolase activity, hydrolyzing O-glycosyl compounds; INVOLVED IN: systemic acquired resistance, response to cold; LOCATED IN: apoplast, cell wall, vacuole; EXPRESSED IN: 17 plant structures; EXPRESSED DURING: 9 growth stages; CONTAINS Int…	.		Yes	6					1.97288		2.34264						3.04208			1.65416					-1.80468
	AT4G10500		2-oxoglutarate (2OG) and Fe(II)-dependent oxygenase superfamily protein 2-oxoglutarate (2OG) and Fe(II)-dependent oxygenase superfamily protein; FUNCTIONS IN: oxidoreductase activity, acting on paired donors, with incorporation or reduction of molecular oxygen, 2-oxoglutarate as one donor, and incorporation of one atom each of oxygen into both donors, oxidoreductase activity; INVOLVED IN: seconda…	.		Yes	9					2.60839	1.3642	3.253	1.30205								1.94563					-1.4924
	AT4G25100	FSD1	Fe superoxide dismutase 1 Fe-superoxide dismutase Fe superoxide dismutase 1 (FSD1); CONTAINS InterPro DOMAIN/s: Manganese/iron superoxide dismutase, N-terminal (InterPro:IPR019831), Manganese/iron superoxide dismutase (InterPro:IPR001189), Manganese/iron superoxide dismutase, C-terminal (InterPro:IPR019832), Manganese/iron superoxide dismutase, binding site (InterPro:IPR019833); BEST Arabidopsis …	.		Yes	11	-8.80206	-5.04613	-12.9429	-12.133	-9.53856	-7.5218	-8.66429	-8.83881		-6.08999	2.10075					-5.47128	1.33611	-1.00193		2.21553
	AT5G14565	MiR398c	AT5G14565.1 mirna MIR398C; miRNA Encodes a microRNA that targets both CSD and CytC oxidase family members. MicroRNAs are regulatory RNAs with a mature length of ~21-nucleotides that are processed from hairpin precursors by Dicer-like enzymes. MicroRNAs can negatively regulate gene expression by attenuating translation or by directing mRNA cleavage.Mature sequence: UGUGUUCUCAGGUCACCCCUG. Down-regu…	.		Yes	13	-5.70912		-5.71843							-5.79584
	AT5G22570	WRKY38	WRKY DNA-binding protein 38 member of WRKY Transcription Factor; Group III WRKY DNA-binding protein 38 (WRKY38); CONTAINS InterPro DOMAIN/s: DNA-binding WRKY (InterPro:IPR003657); BEST Arabidopsis thaliana protein match is: WRKY DNA-binding protein 62 (TAIR:AT5G01900.1); Has 3118 Blast hits to 2692 proteins in 112 species: Archae - 0; Bacteria - 0; Metazoa - 0; Fungi - 0; Plants - 3102; Viruses -…	.		Yes	6		1.93622		1.25902		1.58569		3.10913		-1.46713		-2.24724							1.63727
	AT5G23980	FRO4	FRO4; ferric reduction oxidase 4 Encodes a ferric chelate reductase that is expressed at low levels in roots,shoots and cotyledons, but not flowers. Its transcription is regulated by FIT1. ferric reduction oxidase 4 (FRO4); FUNCTIONS IN: ferric-chelate reductase activity; INVOLVED IN: oxidation reduction, N-terminal protein myristoylation; LOCATED IN: endomembrane system, integral to membrane, me…	.		Yes	6	-5.64173		-8.20117	-3.3072						-1.25065	3.6844		3.55065		2.64571				-1.01066
	AT5G24380	YSL2	YELLOW STRIPE like 2 closest Arabidopsis homolog of Zea maize metal-phytosiderophore/metal-nicotianamine transporter ZmYS1 YELLOW STRIPE like 2 (YSL2); FUNCTIONS IN: oligopeptide transporter activity; INVOLVED IN: oligopeptide transport, response to zinc ion, response to iron ion; LOCATED IN: plasma membrane; EXPRESSED IN: 14 plant structures; EXPRESSED DURING: LP.04 four leaves visible, 4 anthes…	.		Yes	10	-1.04696		-2.35071		-1.46573		-2.7427	-1.40206			1.23497					-1.13097
	AT5G57560	TCH4	Xyloglucan endotransglucosylase/hydrolase family protein Encodes a cell wall-modifying enzyme, rapidly upregulated in response to environmental stimuli Touch 4 (TCH4); CONTAINS InterPro DOMAIN/s: Xyloglucan endotransglucosylase/hydrolase (InterPro:IPR016455), Xyloglucan endo-transglycosylase, C-terminal (InterPro:IPR010713), Concanavalin A-like lectin/glucanase, subgroup (InterPro:IPR013320), Con…	.		Yes	2	-1.01693	1.44751			-3.40772	1.0091	-2.52774	1.21714		-1.68531						-2.41411	-1.74997	-3.1513	1.9906		1.47121
	AT5G59520	ZIP2	ZRT/IRT-like protein 2 encodes a metal ion transporter whose expression is regulated by copper. ZRT/IRT-like protein 2 (ZIP2); FUNCTIONS IN: copper ion transmembrane transporter activity, zinc ion transmembrane transporter activity, transferase activity, transferring glycosyl groups; INVOLVED IN: zinc ion transport, response to copper ion; LOCATED IN: plasma membrane; EXPRESSED IN: 16 plant struc…	.		Yes	10	-3.55704		-5.63552	-3.25376						-3.43064	1.61692
Known Fe uptake genes
	AT4G19690	IRT1	IRT1; iron-regulated transporter 1 Fe(II) transport protein (IRT1) iron-regulated transporter 1 (IRT1); FUNCTIONS IN: manganese ion transmembrane transporter activity, zinc ion transmembrane transporter activity, cadmium ion transmembrane transporter activity, copper uptake transmembrane transporter activity, iron ion transmembrane transporter activity; INVOLVED IN: in 11 processes; LOCATED IN: e…	.	Yes		7	-1.3833	-1.31905	2.88917	3.69141		1.9977		2.00671		1.97089	-3.56977	-2.79385	2.0486		2.28914	1.39846			2.72217
	AT1G01580	FRO2	FRO2; ferric reduction oxidase 2 Encodes the low-iron-inducible ferric chelate reductase responsible for reduction of iron at the root surface. It is likely to be the major Fe(III) chelate reductase in Arabidopsis iron metabolism. Coordinately regulated with IRT1, the major transporter responsible for high-affinity iron uptake from the soil, at both transcriptional and posttranscriptional levels.…	.	Yes		11	-1.17813	-1.66585	3.41921	3.22776		1.59957				2.0427	-3.88848	-2.02069	1.56734		2.3928				1.415
	AT3G12900	F6'H1	2-oxoglutarate (2OG) and Fe(II)-dependent oxygenase superfamily protein 2-oxoglutarate (2OG) and Fe(II)-dependent oxygenase superfamily protein; FUNCTIONS IN: oxidoreductase activity, acting on paired donors, with incorporation or reduction of molecular oxygen, 2-oxoglutarate as one donor, and incorporation of one atom each of oxygen into both donors, oxidoreductase activity; INVOLVED IN: biologi…	.	Yes		8	-1.95938	-3.44361	5.18535	4.5744						2.334	-6.96042	-2.38002			4.16221
	AT2G41240	bHLH100	basic helix-loop-helix protein 100 Encodes a member of the basic helix-loop-helix transcription factor family protein. basic helix-loop-helix protein 100 (BHLH100); FUNCTIONS IN: DNA binding, sequence-specific DNA binding transcription factor activity; INVOLVED IN: response to water deprivation, regulation of transcription; LOCATED IN: nucleus; CONTAINS InterPro DOMAIN/s: Achaete-scute transcript…	.			7	-1.20996	1.12955	2.67929	4.44844		5.15821	6.51548	6.52739		2.72403	-3.98806	-3.22523	5.06255		2.43212	4.06271			14.5128	6.45386	9.13895
	AT5G04150	bHLH101	basic helix-loop-helix 101 (bHLH) DNA-binding superfamily protein BHLH101; FUNCTIONS IN: DNA binding, sequence-specific DNA binding transcription factor activity; INVOLVED IN: regulation of transcription; LOCATED IN: nucleus; EXPRESSED IN: root, leaf; EXPRESSED DURING: LP.04 four leaves visible; CONTAINS InterPro DOMAIN/s: Helix-loop-helix DNA-binding domain (InterPro:IPR001092), Helix-loop-helix…	.			8			1.81035	3.26733		3.57585		2.54083		1.34422	-2.49665	-2.06747	2.37801		1.591	1.47465			7.35464		4.52214
	AT3G56970	bHLH38	basic helix-loop-helix 38 (bHLH) DNA-binding superfamily protein Encodes a member of the basic helix-loop-helix transcription factor family protein. BHLH038; FUNCTIONS IN: DNA binding, sequence-specific DNA binding transcription factor activity; INVOLVED IN: regulation of transcription; LOCATED IN: nucleus; CONTAINS InterPro DOMAIN/s: Achaete-scute transcription factor related (InterPro:IPR015660…	.			5			2.33772	3.37431		4.11732		7.49925		2.1211	-3.37707	-2.37578	3.81725		1.89596	6.63825			12.9958		5.571
	AT3G56980	bHLH39	basic helix-loop-helix 39 (bHLH) DNA-binding superfamily protein Encodes a member of the basic helix-loop-helix transcription factor protein. BHLH039; FUNCTIONS IN: DNA binding, sequence-specific DNA binding transcription factor activity; INVOLVED IN: regulation of transcription; LOCATED IN: nucleus; EXPRESSED IN: 7 plant structures; EXPRESSED DURING: LP.06 six leaves visible, LP.04 four leaves v…	.			6	-1.03265			2.55601		4.56271		4.80277		1.56431	-1.49677	-1.63879	3.14651		1.94811	6.49415			11.6504		4.73372
Fe or other metal homeostasis-related
	AT5G01600	FER1	ferretin 1 Encodes a ferretin protein that is targeted to the chloroplast. Member of a Ferritin gene family. Gene expression is induced in response to iron overload and by nitric oxide. Expression of the gene is downregulated in the presence of paraquat, an inducer of photoxidative stress. ferretin 1 (FER1); FUNCTIONS IN: ferric iron binding, iron ion binding; INVOLVED IN: in 12 processes; LOCATE…	.			8		-1.99639				-2.53743		-2.51336			1.22036		-2.46011		-1.30062	-3.31478		-1.69996	-6.53841		-4.88375
	AT2G40300	FER4	ferritin 4 Encodes FERRITIN 4, AtFER4. Ferritins are a class of 24-mer multi-meric proteins found in all kingdoms of life. Function as the main iron store in mammals. Evidence suggests that Arabidopsis ferritins are essential to protect cells against oxidative damage, but they do not constitute the major iron pool. Localize to mitochondria. Knock out mutants are not sensitive to abiotic stress. f…	.			10						-2.404		-1.26931					-1.82362			-1.64238			-4.3613		-1.81485
	AT5G26690		Heavy metal transport/detoxification superfamily protein Heavy metal transport/detoxification superfamily protein ; FUNCTIONS IN: metal ion binding; INVOLVED IN: metal ion transport; LOCATED IN: cellular_component unknown; CONTAINS InterPro DOMAIN/s: Heavy metal transport/detoxification protein (InterPro:IPR006121); BEST Arabidopsis thaliana protein match is: Heavy metal transport/detoxification …	.			4						1.69854		2.01973		-1.93281									2.25798
	AT1G47400	IMA1/FEP3	IMA1/FEP3; BEST Arabidopsis thaliana protein match is: unknown protein (TAIR:AT1G47395.1); Has 11 Blast hits to 11 proteins in 2 species: Archae - 0; Bacteria - 0; Metazoa - 0; Fungi - 0; Plants - 11; Viruses - 0; Other Eukaryotes - 0 (source: NCBI BLink). |	.			9		2.05294		2.96699	-4.48262	3.477	2.38178	3.40218			-4.06804	-1.99587	3.86507		1.88308	2.95627	-2.48482		10.8945	4.39315	7.0067
	AT2G30766	IMA3/FEP1	IMA3/FEP1; FUNCTIONS IN: molecular_function unknown; INVOLVED IN: biological_process unknown; LOCATED IN: cellular_component unknown. |	.			5					-4.77063	1.9868	3.2479	3.05476		4.50809			5.42354			2.79825	-2.91675		9.53936	5.1246	7.01066
	AT1G21140		Vacuolar iron transporter (VIT) family protein Vacuolar iron transporter (VIT) family protein; CONTAINS InterPro DOMAIN/s: Protein of unknown function DUF125, transmembrane (InterPro:IPR008217); BEST Arabidopsis thaliana protein match is: Vacuolar iron transporter (VIT) family protein (TAIR:AT3G43660.1); Has 1867 Blast hits to 1856 proteins in 645 species: Archae - 60; Bacteria - 1279; Metazoa - …	.			6		-2.90242		1.10884		-1.43834		-1.17779				-1.06138	-2.25062	1.00119		-1.2906			-3.3517		-2.01372
	AT3G18290	BTS	BRUTUS (BTS), a putative E3 ligase protein with metal ion binding and DNA binding domains, which negatively regulates the response to iron deficiency. BRUTUS (BTS); FUNCTIONS IN: zinc ion binding; INVOLVED IN: cellular response to iron ion starvation, embryo development ending in seed dormancy; EXPRESSED IN: 23 plant structures; EXPRESSED DURING: 14 growth stages; CONTAINS InterPro DOMAIN/s: Zinc…	.			4						2.17863		1.23284					1.36685						3.32062		1.66197
Redox Homeostasis
	AT4G34410	RRTF1	redox responsive transcription factor 1 encodes a member of the ERF (ethylene response factor) subfamily B-3 of ERF/AP2 transcription factor family. The protein contains one AP2 domain. There are 18 members in this subfamily including ATERF-1, ATERF-2, AND ATERF-5. redox responsive transcription factor 1 (RRTF1); CONTAINS InterPro DOMAIN/s: DNA-binding, integrase-type (InterPro:IPR016177), Pathog…	.	Yes			-2.52032	4.1979			-6.57321		-3.20489	7.66129		-3.30031		-3.08091	3.42944			-3.86625	-2.73545	-8.33506			5.91549
	AT1G80840	WRKY40	WRKY DNA-binding protein 40 Pathogen-induced transcription factor. Binds W-box sequences in vitro. Forms protein complexes with itself and with WRKY40 and WRKY60. Coexpression with WRKY18 or WRKY60 made plants more susceptible to both P. syringae and B. cinerea. WRKY18, WRKY40, and WRKY60 have partially redundant roles in response to the hemibiotrophic bacterial pathogen Pseudomonas syringae and …	.					1.94183			-3.22102		-1.39997	2.7309		-1.4389		-1.38572		1.07652		-3.1289	-2.09047	-4.52781			1.42808
	AT1G12610	DDF1	DDF1/Integrase-type DNA-binding superfamily protein Encodes a member of the DREB subfamily A-1 of ERF/AP2 transcription factor family (DDF1). The protein contains one AP2 domain. There are six members in this subfamily, including CBF1, CBF2, and CBF3. Overexpression of this gene results in delayed flowering and dwarfism, reduction of gibberellic acid biosynthesis, and increased tolerance to high …	.				-4.2047	4.07135			-6.55003	-1.61108		6.05384		-3.0661		-6.15096	5.21891			-2.1118	-2.96716	-7.42628			5.19086
	AT1G27730	ZAT10	salt tolerance zinc finger Related to Cys2/His2-type zinc-finger proteins found in higher plants. Compensated for a subset of calcineurin deficiency in yeast. Salt tolerance produced by ZAT10 appeared to be partially dependent on ENA1/PMR2, a P-type ATPase required for Li+ and Na+ efflux in yeast. The protein is localized to the nucleus, acts as a transcriptional repressor and is responsive to ch…	.				-1.20837	1.42262	-1.12548	-1.06093	-2.11819		-1.07372	1.63864		-1.9367						-2.21687	-1.55256	-3.40228
	AT3G55980	SZF1	salt-inducible zinc finger 1 salt-inducible zinc finger 1 (SZF1); CONTAINS InterPro DOMAIN/s: Zinc finger, CCCH-type (InterPro:IPR000571), Ankyrin repeat-containing domain (InterPro:IPR020683), Ankyrin repeat (InterPro:IPR002110); BEST Arabidopsis thaliana protein match is: zinc finger (CCCH-type) family protein (TAIR:AT2G40140.2); Has 1623 Blast hits to 1414 proteins in 181 species: Archae - 2; …	.								-2.25418		-1.28934			-1.46876						-2.0674	-1.45201	-2.76291
	AT3G49620		2-oxoglutarate (2OG) and Fe(II)-dependent oxygenase superfamily protein encodes a protein similar to 2-oxoacid-dependent dioxygenase. Expression is induced after 24 hours of dark treatment, in senescing leaves and treatment with exogenous photosynthesis inhibitor. Induction of gene expression was suppressed in excised leaves supplied with sugar. The authors suggest that the gene's expression patt…	.				1.85634	-1.89576	3.56209							1.22392		-1.70267	-2.52234	1.20289	-4.29798
	AT4G24570	DIC2	dicarboxylate carrier 2 Encodes one of the mitochondrial dicarboxylate carriers (DIC): DIC1 (AT2G22500), DIC2 (AT4G24570), DIC3 (AT5G09470). dicarboxylate carrier 2 (DIC2); FUNCTIONS IN: binding, dicarboxylic acid transmembrane transporter activity; INVOLVED IN: transport, mitochondrial transport; LOCATED IN: mitochondrial inner membrane, membrane; EXPRESSED IN: 24 plant structures; EXPRESSED DUR…	.				-1.12972	1.48776		-1.30677	-3.83126	1.32506	-1.92453	1.41004		-2.0945						-3.23476	-1.68671	-3.70507	1.91343		1.54425	#REF!
Others
	AT5G53250	AGP22	arabinogalactan protein 22 arabinogalactan protein 22 (AGP22); CONTAINS InterPro DOMAIN/s: Protein of unknown function DUF1070 (InterPro:IPR009424); BEST Arabidopsis thaliana protein match is: arabinogalactan protein 20 (TAIR:AT3G61640.1); Has 1807 Blast hits to 1807 proteins in 277 species: Archae - 0; Bacteria - 0; Metazoa - 736; Fungi - 347; Plants - 385; Viruses - 0; Other Eukaryotes - 339 (s…	.	Yes				-1.29024				2.38244		1.93082										-2.06648	1.55382
	AT4G13420	HAK5	high affinity K+ transporter 5 Encodes a protein of the KUP/HAK/KT potassium channel class that is upregulated in the roots by K levels. high affinity K+ transporter 5 (HAK5); FUNCTIONS IN: potassium ion transmembrane transporter activity, potassium:sodium symporter activity; INVOLVED IN: potassium ion transport; LOCATED IN: membrane; EXPRESSED IN: 15 plant structures; EXPRESSED DURING: 8 growth …	.	Yes				3.81459	1.42104							1.60503		1.01211	5.12261	1.42817
	AT5G48010	THAS1	thalianol synthase 1 Encodes an oxidosqualene cyclase involved in the biosynthesis of thalianol, a tricyclic triterpenoid of unknown function. Overexpression of THAS leads to dwarfing in the aerial tissues of Arabidopsis plants, but increases their root length. THAS is part of a small operon-like cluster of genes (with At5g48000 (THAH) and At5g47990 (THAD)) involved in thalianol metabolism. thali…	.	Yes			2.87097									2.80104	2.34321				-1.48714
	AT4G28850	XTH26	xyloglucan endotransglucosylase/hydrolase 26 xyloglucan endotransglucosylase/hydrolase 26 (XTH26); FUNCTIONS IN: hydrolase activity, acting on glycosyl bonds, hydrolase activity, hydrolyzing O-glycosyl compounds, xyloglucan:xyloglucosyl transferase activity; INVOLVED IN: carbohydrate metabolic process, cellular glucan metabolic process; LOCATED IN: endomembrane system, apoplast, cell wall; EXPRES…	.	Yes			1.19898		2.05375							2.59269		1.18366
	AT5G33355		Defensin-like (DEFL) family protein Encodes a defensin-like (DEFL) family protein. Defensin-like (DEFL) family protein; LOCATED IN: endomembrane system; BEST Arabidopsis thaliana protein match is: unknown protein (TAIR:AT3G59930.1); Has 30201 Blast hits to 17322 proteins in 780 species: Archae - 12; Bacteria - 1396; Metazoa - 17338; Fungi - 3422; Plants - 5037; Viruses - 0; Other Eukaryotes - 299…	.	Yes					-3.2943	-2.25192						-1.8675
	AT2G04050		MATE efflux family protein MATE efflux family protein; FUNCTIONS IN: antiporter activity, drug transmembrane transporter activity, transporter activity; INVOLVED IN: drug transmembrane transport, transmembrane transport; LOCATED IN: membrane; EXPRESSED IN: stem, leaf whorl, stamen; EXPRESSED DURING: 4 anthesis, petal differentiation and expansion stage; CONTAINS InterPro DOMAIN/s: MATE family tra…	.	Yes				3.64641	3.47576										4.11279			2.8885			1.67704
	AT4G17680		SBP (S-ribonuclease binding protein) family protein SBP (S-ribonuclease binding protein) family protein; FUNCTIONS IN: zinc ion binding; INVOLVED IN: biological_process unknown; LOCATED IN: cellular_component unknown; CONTAINS InterPro DOMAIN/s: Zinc finger, RING-type (InterPro:IPR001841), S-ribonuclease binding protein, SBP1, pollen (InterPro:IPR017066); BEST Arabidopsis thaliana protein match i…	.	Yes			-1.33649	-3.69065		4.24083						2.5739	-4.10408	-2.45583			3.11962
	AT2G41730		unknown protein; BEST Arabidopsis thaliana protein match is: unknown protein (TAIR:AT5G24640.1); Has 25 Blast hits to 25 proteins in 5 species: Archae - 0; Bacteria - 0; Metazoa - 0; Fungi - 0; Plants - 25; Viruses - 0; Other Eukaryotes - 0 (source: NCBI BLink). |	.	Yes				2.59603	2.62709										3.33862	2.29789					1.34588
	AT4G27654		unknown protein; FUNCTIONS IN: molecular_function unknown; INVOLVED IN: biological_process unknown; LOCATED IN: endomembrane system; EXPRESSED IN: 17 plant structures; EXPRESSED DURING: 9 growth stages; Has 30201 Blast hits to 17322 proteins in 780 species: Archae - 12; Bacteria - 1396; Metazoa - 17338; Fungi - 3422; Plants - 5037; Viruses - 0; Other Eukaryotes - 2996 (source: NCBI BLink). |	.	Yes				4.21711	-1.67812	-2.54578	-5.74135			4.54435		-3.26295			2.05515			-4.04975	-2.28971	-5.81493			4.47393
	AT1G63030	DDF2	Integrase-type DNA-binding superfamily protein encodes a member of the DREB subfamily A-1 of ERF/AP2 transcription factor family (DDF2). The protein contains one AP2 domain. There are six members in this subfamily, including CBF1, CBF2, and CBF3. Overexpression of this gene results in the reduction of gibberellic acid biosynthesis. This gene is expressed in all tissues examined, but most abundant…	.								-6.53576	-3.26106												-3.86484			5.74427
	AT3G23240	ERF1	ethylene response factor 1 encodes a member of the ERF (ethylene response factor) subfamily B-3 of ERF/AP2 transcription factor family (ERF1). The protein contains one AP2 domain. There are 18 members in this subfamily including ATERF-1, ATERF-2, AND ATERF-5. EREBP like protein that binds GCC box of ethylene regulated promoters such as basic chitinases. Constitutive expression of ERF1 phenocopies…	.					2.5643	1.16625											1.36155	-1.12833
	AT5G61600	ERF104	ethylene response factor 104 encodes a member of the ERF (ethylene response factor) subfamily B-3 of ERF/AP2 transcription factor family. The protein contains one AP2 domain. There are 18 members in this subfamily including ATERF-1, ATERF-2, AND ATERF-5. ethylene response factor 104 (ERF104); CONTAINS InterPro DOMAIN/s: DNA-binding, integrase-type (InterPro:IPR016177), Pathogenesis-related transc…	.								-2.2046		-1.14751			-1.589						-2.00323		-3.17635
	AT1G28370	ERF11	ERF domain protein 11 encodes a member of the ERF (ethylene response factor) subfamily B-1 of ERF/AP2 transcription factor family. The protein contains one AP2 domain. There are 15 members in this subfamily including ATERF-3, ATERF-4, ATERF-7, and leafy petiole. ERF domain protein 11 (ERF11); CONTAINS InterPro DOMAIN/s: DNA-binding, integrase-type (InterPro:IPR016177), Pathogenesis-related transc…	.					2.22088		-1.12636	-2.36885	1.41013		2.74133		-1.11168			1.4629		-1.44021	-3.27493	-1.88071	-4.47767
	AT1G76650	CML38	calmodulin-like 38 calmodulin-like 38 (CML38); CONTAINS InterPro DOMAIN/s: EF-Hand 1, calcium-binding site (InterPro:IPR018247), EF-HAND 2 (InterPro:IPR018249), EF-hand-like domain (InterPro:IPR011992), Calcium-binding EF-hand (InterPro:IPR002048); BEST Arabidopsis thaliana protein match is: Calcium-binding EF-hand family protein (TAIR:AT1G76640.1). |	.				-1.56381	1.79998		-1.3602	-3.07816	-1.51609	-1.37144	2.11346		-1.58649			1.78296	1.15761		-2.84115	-2.1782	-3.70899	-1.27793		1.4838
	AT1G02450	NIMIN1	NIM1-interacting 1 NIMIN1 modulates PR gene expression according the following model: NPR1 forms a ternary complex with NIMIN1 and TGA factors upon SAR induction that binds to a positive regulatory cis-element of the PR-1 promoter, termed LS7. This leads to PR-1 gene induction. NIMIN1 decreases transcriptional activation, possibly through its EAR motif, which results in fine-tuning of PR-1 gene e…	.						-1.02054		-1.1728	1.55853		2.4377		-1.43026	1.22953	-1.27355						-1.73624	2.60495		1.87976
	AT1G07135		glycine-rich protein glycine-rich protein; Has 22251 Blast hits to 8348 proteins in 789 species: Archae - 21; Bacteria - 7328; Metazoa - 6126; Fungi - 1280; Plants - 3980; Viruses - 524; Other Eukaryotes - 2992 (source: NCBI BLink). |	.				-1.28445			-1.01469	-2.3565		-1.24662	1.1249		-1.91146						-2.01129	-1.21014	-3.28973
	AT1G09540	MYB61	myb domain protein 61 Encodes putative transcription factor. Mutants lack of mucilage extrusion from the seeds during imbibition. Reduced quantities of mucilage are deposited during the development of the seed coat epidermis in myb61 mutants. Expressed in guard cells,loss of function mutations show an increase in stomatal pore opening suggesting a role in ABA independent regulation of stomatal po…	.									2.42699		3.40673										-3.19385	1.24843	-2.26683
	AT1G12805		nucleotide binding nucleotide binding; Has 35333 Blast hits to 34131 proteins in 2444 species: Archae - 798; Bacteria - 22429; Metazoa - 974; Fungi - 991; Plants - 531; Viruses - 0; Other Eukaryotes - 9610 (source: NCBI BLink). |	.					4.52229	3.2432	-2.0609						2.40411		3.47757	6.09373	2.74461
	AT1G13609		Defensin-like (DEFL) family protein Encodes a defensin-like (DEFL) family protein. Defensin-like (DEFL) family protein; LOCATED IN: endomembrane system. |	.					3.28044			-6.92887	3.48123	4.92422	3.77446		3.78294			8.73959			4.69696	-4.31331		15.1307	7.52557	9.74594
	AT1G15010		unknown protein; BEST Arabidopsis thaliana protein match is: unknown protein (TAIR:AT2G01300.1); Has 71 Blast hits to 71 proteins in 13 species: Archae - 0; Bacteria - 2; Metazoa - 0; Fungi - 0; Plants - 69; Viruses - 0; Other Eukaryotes - 0 (source: NCBI BLink). |	.				-2.06341	1.69524			-2.21255	-2.11814		2.45605		-1.81149		-1.82033	1.95064				-2.35913	-2.578			2.0966
	AT1G18100		PEBP (phosphatidylethanolamine-binding protein) family protein Encodes a member of the FT and TFL1 family of phosphatidylethanolamine-binding proteins. It is expressed in seeds and up-regulated in response to ABA. Loss of function mutants show decreased rate of germination in the presence of ABA. ABA dependent regulation is mediated by both ABI3 and ABI5. ABI5 promotes MFT expression, primarily i…	.				1.05327	2.32567	1.41992							1.56538			2.85401
	AT1G24580		RING/U-box superfamily protein RING/U-box superfamily protein; FUNCTIONS IN: zinc ion binding; LOCATED IN: endomembrane system; CONTAINS InterPro DOMAIN/s: Zinc finger, RING-type (InterPro:IPR001841), Zinc finger, C3HC4 RING-type (InterPro:IPR018957); BEST Arabidopsis thaliana protein match is: RING/U-box superfamily protein (TAIR:AT1G67856.1); Has 35333 Blast hits to 34131 proteins in 2444 speci…	.								2.72514	2.96293							3.63049						1.01419	-1.51263	-2.306
	AT1G32170	XTH30	xyloglucan endotransglucosylase/hydrolase 30 xyloglucan endotransglycosylase-related protein (XTR4) xyloglucan endotransglucosylase/hydrolase 30 (XTH30); FUNCTIONS IN: hydrolase activity, acting on glycosyl bonds, xyloglucan:xyloglucosyl transferase activity, hydrolase activity, hydrolyzing O-glycosyl compounds; INVOLVED IN: carbohydrate metabolic process, cellular glucan metabolic process; LOCAT…	.									1.99248		1.02909									-1.2857	-1.61818	1.88879
	AT1G33760		Integrase-type DNA-binding superfamily protein encodes a member of the DREB subfamily A-4 of ERF/AP2 transcription factor family. The protein contains one AP2 domain. There are 17 members in this subfamily including TINY. Integrase-type DNA-binding superfamily protein; FUNCTIONS IN: DNA binding, sequence-specific DNA binding transcription factor activity; INVOLVED IN: regulation of transcription,…	.								-5.99284		-4.584	4.11914								-4.85424	-2.31909	-6.86672
	AT1G33960		P-loop containing nucleoside triphosphate hydrolases superfamily protein Identified as a gene that is induced by avirulence gene avrRpt2 and RPS2 after infection with Pseudomonas syringae pv maculicola strain ES4326 carrying avrRpt2 AVRRPT2-INDUCED GENE 1 (AIG1); FUNCTIONS IN: GTP binding; INVOLVED IN: response to bacterium; EXPRESSED IN: 11 plant structures; EXPRESSED DURING: 8 growth stages; CO…	.										2.72841	1.35162					5.69109			2.73036			1.6139
	AT1G35140	PHI-1	Phosphate-responsive 1 family protein At1g35140 (At1g35140/T32G9_32) mRNA, complete cds PHOSPHATE-INDUCED 1 (PHI-1); CONTAINS InterPro DOMAIN/s: Phosphate-induced protein 1 (InterPro:IPR006766); BEST Arabidopsis thaliana protein match is: Phosphate-responsive 1 family protein (TAIR:AT4G08950.1); Has 400 Blast hits to 400 proteins in 24 species: Archae - 0; Bacteria - 2; Metazoa - 0; Fungi - 0; Pl…	.					2.2108		-1.6268	-4.62929	1.25444	-2.11396	2.66025					3.20212	1.33612		-4.10557	-2.96978	-4.7895	1.76649		2.50303
	AT1G43590.1		AT1G43590.1 transposable_element_gene transposable element gene similar to unknown protein [Arabidopsis thaliana] (TAIR:AT5G34838.1); similar to hypothetical protein 24.t00017 [Brassica oleracea] (GB:ABD64939.1); contains InterPro domain Protein of unknown function DUF635; (InterPro:IPR006912) |	.				-5.5831		-7.35967		-2.14752					-5.73465		-7.5314				-2.24874		-2.4676
	AT1G43800		Plant stearoyl-acyl-carrier-protein desaturase family protein Plant stearoyl-acyl-carrier-protein desaturase family protein; FUNCTIONS IN: acyl-[acyl-carrier-protein] desaturase activity, oxidoreductase activity, transition metal ion binding; INVOLVED IN: oxidation reduction, fatty acid metabolic process, fatty acid biosynthetic process; LOCATED IN: membrane; EXPRESSED IN: 9 plant structures; EXP…	.					4.04139	1.99279	-3.52777	-1.36507		-1.22886			1.59873		3.63653	6.17869	2.66175							1.25252
	AT1G52820		2-oxoglutarate (2OG) and Fe(II)-dependent oxygenase superfamily protein 2-oxoglutarate (2OG) and Fe(II)-dependent oxygenase superfamily protein; FUNCTIONS IN: oxidoreductase activity; EXPRESSED IN: root; CONTAINS InterPro DOMAIN/s: Oxoglutarate/iron-dependent oxygenase (InterPro:IPR005123); BEST Arabidopsis thaliana protein match is: 2-oxoglutarate (2OG) and Fe(II)-dependent oxygenase superfamily…	.				-1.45312		-1.58748							-1.41657					1.47343
	AT1G55525		AT1G55525.1 other_rna other RNA Unknown gene |	.				1.83649		2.63532							2.272					-3.02718
	AT1G58290		Glutamyl-tRNA reductase family protein Encodes a protein with glutamyl-tRNA reductase (GluTR) activity, catalyzing the NADPH-dependent reduction of Glu-tRNA(Glu) to glutamate 1-semialdehyde (GSA) with the release of free tRNA(Glu). It is involved in the early steps of chlorophyll biosynthesis. HEMA1; FUNCTIONS IN: glutamyl-tRNA reductase activity; INVOLVED IN: chlorophyll biosynthetic process, he…	.									-2.52145		-1.13075											-3.36337
	AT1G63055		unknown protein; BEST Arabidopsis thaliana protein match is: unknown protein (TAIR:AT1G63057.2); Has 35333 Blast hits to 34131 proteins in 2444 species: Archae - 798; Bacteria - 22429; Metazoa - 974; Fungi - 991; Plants - 531; Viruses - 0; Other Eukaryotes - 9610 (source: NCBI BLink). |	.				2.21763									2.9793					-2.97628
	AT1G65970	TPX2	thioredoxin-dependent peroxidase 2 thioredoxin-dependent peroxidase 2 thioredoxin-dependent peroxidase 2 (TPX2); FUNCTIONS IN: oxidoreductase activity, antioxidant activity; INVOLVED IN: cell redox homeostasis; LOCATED IN: cellular_component unknown; EXPRESSED IN: leaf; CONTAINS InterPro DOMAIN/s: Thioredoxin fold (InterPro:IPR012335), Thioredoxin-like (InterPro:IPR017936), Thioredoxin-like fold …	.										1.63815	2.49172					-1.16841					-2.20656
	AT1G67030	ZFP6	zinc finger protein 6 Encodes a zinc finger protein containing only a single zinc finger. zinc finger protein 6 (ZFP6); FUNCTIONS IN: sequence-specific DNA binding transcription factor activity, zinc ion binding, nucleic acid binding; INVOLVED IN: regulation of transcription; LOCATED IN: cytosolic ribosome; EXPRESSED IN: 7 plant structures; EXPRESSED DURING: 4 anthesis, petal differentiation and …	.									1.5408		3.45717										-3.15186		-2.16485
	AT1G69880	TH8	thioredoxin H-type 8 thioredoxin H-type 8 (TH8); INVOLVED IN: N-terminal protein myristoylation, cell redox homeostasis; LOCATED IN: cellular_component unknown; EXPRESSED IN: 15 plant structures; EXPRESSED DURING: 6 growth stages; CONTAINS InterPro DOMAIN/s: Thioredoxin fold (InterPro:IPR012335), Thioredoxin, core (InterPro:IPR015467), Thioredoxin-like (InterPro:IPR017936), Thioredoxin domain (In…	.					4.6088	3.59054							2.3627			7.14801	2.38332
	AT1G77120	ADH1	alcohol dehydrogenase 1 Catalyzes the reduction of acetaldehyde using NADH as reductant. Requires zinc for activity. Dimer. Anaerobic response polypeptide (ANP). Fermentation. The protein undergoes thiolation following treatment with the oxidant tert-butylhydroperoxide. alcohol dehydrogenase 1 (ADH1); FUNCTIONS IN: alcohol dehydrogenase (NAD) activity; INVOLVED IN: response to cadmium ion, cellul…	.					4.31846	3.64774	-3.77051						1.12573		3.51496	6.06452	4.29418
	AT1G78950		Terpenoid cyclases family protein Terpenoid cyclases family protein; CONTAINS InterPro DOMAIN/s: Terpene synthase, conserved site (InterPro:IPR002365), Squalene cyclase (InterPro:IPR018333), Terpenoid cylases/protein prenyltransferase alpha-alpha toroid (InterPro:IPR008930), Prenyltransferase/squalene oxidase (InterPro:IPR001330); BEST Arabidopsis thaliana protein match is: camelliol C synthase 1…	.									1.14075		2.36433										-2.36028		-1.51093
	AT2G02010	GAD4	glutamate decarboxylase 4 glutamate decarboxylase 4 (GAD4); FUNCTIONS IN: calmodulin binding; INVOLVED IN: carboxylic acid metabolic process, glutamate metabolic process, glutamate decarboxylation to succinate; LOCATED IN: cytosol, nucleus; CONTAINS InterPro DOMAIN/s: Pyridoxal phosphate-dependent transferase, major domain (InterPro:IPR015424), Pyridoxal phosphate-dependent decarboxylase (InterPr…	.				1.21374		2.30017											1.4162	-2.006	-1.2682
	AT2G03821		unknown protein; FUNCTIONS IN: molecular_function unknown; INVOLVED IN: biological_process unknown; LOCATED IN: cellular_component unknown; Has 3 Blast hits to 3 proteins in 2 species: Archae - 0; Bacteria - 0; Metazoa - 1; Fungi - 0; Plants - 2; Viruses - 0; Other Eukaryotes - 0 (source: NCBI BLink). |	.				-4.53534		-6.69586							-4.69869
	AT2G14247		Expressed protein Expressed protein; FUNCTIONS IN: molecular_function unknown; INVOLVED IN: biological_process unknown; LOCATED IN: chloroplast; Has 35333 Blast hits to 34131 proteins in 2444 species: Archae - 798; Bacteria - 22429; Metazoa - 974; Fungi - 991; Plants - 531; Viruses - 0; Other Eukaryotes - 9610 (source: NCBI BLink). |	.					4.08832			-4.70236	3.84331	2.82389	5.21667		2.4931		1.60413	6.56019			2.69552	-2.45255	-2.50659	11.2186	5.08946	7.40584
	AT2G14560	DUF567	Protein of unknown function (DUF567) Encodes LURP1, a member of the LURP cluster (late upregulated in response to Hyaloperonospora parasitica) which exhibits a pronounced upregulation after recognition of the pathogenic oomycte H. parasitica. LURP1 is required for full basal defense to H. parasitica and resistance to this pathogen mediated by the R-proteins RPP4 and RPP5. LATE UPREGULATED IN RESP…	.								-1.60747	2.17493		3.36951		-3.20606		-2.40091	-2.35728		-1.48614			-2.15341	3.68789	1.48799	2.82526
	AT2G14610	PR1	pathogenesis-related gene 1 PR1 gene expression is induced in response to a variety of pathogens. It is a useful molecular marker for the SAR response. Though the Genbank record for the cDNA associated to this gene is called 'PR-1-like', the sequence actually corresponds to PR1. Expression of this gene is salicylic-acid responsive. pathogenesis-related gene 1 (PR1); FUNCTIONS IN: molecular_functi…	.								1.29266	2.93448	2.16788	3.51797								1.96424		-1.73086	3.57746
	AT2G16005		MD-2-related lipid recognition domain-containing protein MD-2-related lipid recognition domain-containing protein; FUNCTIONS IN: molecular_function unknown; INVOLVED IN: biological_process unknown; LOCATED IN: endomembrane system; EXPRESSED IN: root; CONTAINS InterPro DOMAIN/s: MD-2-related lipid-recognition (InterPro:IPR003172); BEST Arabidopsis thaliana protein match is: MD-2-related lipid reco…	.				1.04655	-1.60286	-2.01791							1.06573	1.32223		-1.58213	-1.73534
	AT2G16060	HB1	hemoglobin 1 Encodes a class 1 nonsymbiotic hemoglobin induced by low oxygen levels with very high oxygen affinity. It is not likely to be a hemoglobin transporter because of its extremely high affinity for oxygen. hemoglobin 1 (HB1); FUNCTIONS IN: oxygen binding; INVOLVED IN: response to hypoxia; LOCATED IN: cell wall, plasma membrane; EXPRESSED IN: 22 plant structures; EXPRESSED DURING: 14 grow…	.					2.95247	1.40853	-2.36007								1.84709	3.8289	1.95863					1.32705
	AT2G17850		Rhodanese/Cell cycle control phosphatase superfamily protein Rhodanese/Cell cycle control phosphatase superfamily protein; FUNCTIONS IN: molecular_function unknown; INVOLVED IN: aging; LOCATED IN: endomembrane system; EXPRESSED IN: 9 plant structures; EXPRESSED DURING: 9 growth stages; CONTAINS InterPro DOMAIN/s: Rhodanese-like (InterPro:IPR001763); BEST Arabidopsis thaliana protein match is: sul…	.					7.12719	8.04354	-3.77047								5.4809	9.40243	6.35385
	AT2G25625		unknown protein; FUNCTIONS IN: molecular_function unknown; INVOLVED IN: biological_process unknown; LOCATED IN: chloroplast; EXPRESSED IN: 10 plant structures; EXPRESSED DURING: LP.06 six leaves visible, LP.04 four leaves visible, 4 anthesis, petal differentiation and expansion stage; Has 24 Blast hits to 24 proteins in 9 species: Archae - 0; Bacteria - 0; Metazoa - 0; Fungi - 0; Plants - 24; Vir…	.								-1.28337		-6.7343	-4.19139								-3.34494			-2.84008	-4.65775	-3.40364
	AT2G27080		Late embryogenesis abundant (LEA) hydroxyproline-rich glycoprotein family Late embryogenesis abundant (LEA) hydroxyproline-rich glycoprotein family; CONTAINS InterPro DOMAIN/s: Late embryogenesis abundant protein, group 2 (InterPro:IPR004864); BEST Arabidopsis thaliana protein match is: Late embryogenesis abundant (LEA) hydroxyproline-rich glycoprotein family (TAIR:AT5G21130.1); Has 35333 Blast h…	.								-3.75349		-1.89628	2.09971					1.17603			-1.42635	-2.23092	-3.9687	1.63663		1.88837
	AT2G29460	GSTU4	glutathione S-transferase tau 4 Encodes glutathione transferase belonging to the tau class of GSTs. Naming convention according to Wagner et al. (2002). glutathione S-transferase tau 4 (GSTU4); CONTAINS InterPro DOMAIN/s: Thioredoxin fold (InterPro:IPR012335), Glutathione S-transferase, C-terminal (InterPro:IPR004046), Glutathione S-transferase, C-terminal-like (InterPro:IPR010987), Glutathione S…	.				1.19825	1.74605	3.60396									-1.67175	1.33452	1.17184	-2.8818
	AT2G30760		unknown protein; Has 3 Blast hits to 3 proteins in 2 species: Archae - 0; Bacteria - 0; Metazoa - 0; Fungi - 0; Plants - 3; Viruses - 0; Other Eukaryotes - 0 (source: NCBI BLink). |	.									1.87396		2.92754					2.83451						7.47616		6.41558
	AT2G30770	CYP71A13	cytochrome P450, family 71, subfamily A, polypeptide 13 putative cytochrome P450 cytochrome P450, family 71, subfamily A, polypeptide 13 (CYP71A13); CONTAINS InterPro DOMAIN/s: Cytochrome P450 (InterPro:IPR001128), Cytochrome P450, E-class, group I (InterPro:IPR002401), Cytochrome P450, conserved site (InterPro:IPR017972); BEST Arabidopsis thaliana protein match is: cytochrome P450, family 71, su…	.									1.58675	2.65181	2.17396					5.60674			2.40615	-1.74071		4.87926	1.83705	2.49801
	AT2G34390	NIP2;1	NOD26-like intrinsic protein 2;1 aquaporin NIP2.1 NOD26-like intrinsic protein 2;1 (NIP2;1); CONTAINS InterPro DOMAIN/s: Major intrinsic protein, conserved site (InterPro:IPR022357), Aquaporin (InterPro:IPR012269), Major intrinsic protein (InterPro:IPR000425); BEST Arabidopsis thaliana protein match is: NOD26-like intrinsic protein 1;2 (TAIR:AT4G18910.1); Has 10129 Blast hits to 10099 proteins in…	.					1.67234	1.84963	-2.54958								2.58616	2.53737	2.45105
	AT2G36885		unknown protein; FUNCTIONS IN: molecular_function unknown; LOCATED IN: chloroplast; EXPRESSED IN: 22 plant structures; EXPRESSED DURING: 13 growth stages; Has 35333 Blast hits to 34131 proteins in 2444 species: Archae - 798; Bacteria - 22429; Metazoa - 974; Fungi - 991; Plants - 531; Viruses - 0; Other Eukaryotes - 9610 (source: NCBI BLink). |	.									-2.92755		-1.1152								-1.21479			-4.25186
	AT2G37870		Bifunctional inhibitor/lipid-transfer protein/seed storage 2S albumin superfamily protein Bifunctional inhibitor/lipid-transfer protein/seed storage 2S albumin superfamily protein; FUNCTIONS IN: lipid binding; INVOLVED IN: lipid transport; LOCATED IN: endomembrane system; EXPRESSED IN: 11 plant structures; EXPRESSED DURING: LP.06 six leaves visible, LP.04 four leaves visible, 4 anthesis, C globul…	.					2.55923			3.14858	1.29874							3.46825						-1.21642	-2.08053	-3.16319
	AT2G39510		nodulin MtN21 /EamA-like transporter family protein nodulin MtN21 /EamA-like transporter family protein; FUNCTIONS IN: molecular_function unknown; INVOLVED IN: biological_process unknown; LOCATED IN: endomembrane system, membrane; EXPRESSED IN: 15 plant structures; EXPRESSED DURING: 6 growth stages; CONTAINS InterPro DOMAIN/s: Protein of unknown function DUF6, transmembrane (InterPro:IPR000620); …	.					5.70196	2.49404	-3.8735				1.23093				2.14384	8.40121	5.2421					1.25399
	AT2G39980		HXXXD-type acyl-transferase family protein HXXXD-type acyl-transferase family protein; FUNCTIONS IN: transferase activity, transferring acyl groups other than amino-acyl groups, transferase activity; INVOLVED IN: response to karrikin; LOCATED IN: cellular_component unknown; EXPRESSED IN: 17 plant structures; EXPRESSED DURING: 10 growth stages; CONTAINS InterPro DOMAIN/s: Transferase (InterPro:IPR…	.					2.95667	2.56506							1.54353			3.92138	2.3338
	AT2G40750	WRKY54	WRKY DNA-binding protein 54 member of WRKY Transcription Factor; Group III WRKY DNA-binding protein 54 (WRKY54); CONTAINS InterPro DOMAIN/s: DNA-binding WRKY (InterPro:IPR003657); BEST Arabidopsis thaliana protein match is: WRKY DNA-binding protein 70 (TAIR:AT3G56400.1); Has 3183 Blast hits to 2752 proteins in 165 species: Archae - 0; Bacteria - 0; Metazoa - 0; Fungi - 0; Plants - 3171; Viruses -…	.								-1.62898	1.26572		3.26603		-1.09736								-2.21411	2.6134	1.43459	2.68549
	AT2G42250	CYP712A1	cytochrome P450, family 712, subfamily A, polypeptide 1 member of CYP712A "cytochrome P450, family 712, subfamily A, polypeptide 1" (CYP712A1); FUNCTIONS IN: electron carrier activity, monooxygenase activity, iron ion binding, oxygen binding, heme binding; INVOLVED IN: oxidation reduction; LOCATED IN: endomembrane system; EXPRESSED IN: root; CONTAINS InterPro DOMAIN/s: Cytochrome P450 (InterPro:I…	.				-1.83822		-2.12044							-1.33796		1.05986			2.02731
	AT2G44798		AT2G44798.1 other_rna other RNA Potential natural antisense gene, locus overlaps with AT2G44800 | AT2G44798.2 other_rna Potential natural antisense gene, locus overlaps with AT2G44800 |	.					3.81349	3.12851										2.9125	2.62939
	AT2G47130		NAD(P)-binding Rossmann-fold superfamily protein NAD(P)-binding Rossmann-fold superfamily protein; FUNCTIONS IN: oxidoreductase activity, binding, catalytic activity; INVOLVED IN: oxidation reduction, metabolic process; LOCATED IN: cellular_component unknown; EXPRESSED IN: 18 plant structures; EXPRESSED DURING: 11 growth stages; CONTAINS InterPro DOMAIN/s: NAD(P)-binding domain (InterPro:IPR01604…	.									1.01565		2.02096										-1.41161	1.66631		1.21649
	AT2G47520	HRE2	Integrase-type DNA-binding superfamily protein encodes a member of the ERF (ethylene response factor) subfamily B-2 of ERF/AP2 transcription factor family. The protein contains one AP2 domain. There are 5 members in this subfamily including RAP2.2 AND RAP2.12. HYPOXIA RESPONSIVE ERF (ETHYLENE RESPONSE FACTOR) 2 (HRE2); CONTAINS InterPro DOMAIN/s: DNA-binding, integrase-type (InterPro:IPR016177), …	.					5.83165	4.22717	-2.98372		4.48757						3.40236	7.14986	4.83343					5.0005
	AT3G02100		UDP-Glycosyltransferase superfamily protein UDP-Glycosyltransferase superfamily protein; FUNCTIONS IN: UDP-glycosyltransferase activity, transferase activity, transferring glycosyl groups; INVOLVED IN: metabolic process; LOCATED IN: cellular_component unknown; EXPRESSED IN: root; CONTAINS InterPro DOMAIN/s: UDP-glucuronosyl/UDP-glucosyltransferase (InterPro:IPR002213); BEST Arabidopsis thaliana p…	.				-2.55118		-4.42934	-1.82379						-3.07175		2.30716			3.03112
	AT3G02480		Late embryogenesis abundant protein (LEA) family protein Late embryogenesis abundant protein (LEA) family protein; BEST Arabidopsis thaliana protein match is: Late embryogenesis abundant protein (LEA) family protein (TAIR:AT5G38760.1); Has 213 Blast hits to 189 proteins in 38 species: Archae - 0; Bacteria - 0; Metazoa - 9; Fungi - 12; Plants - 190; Viruses - 0; Other Eukaryotes - 2 (source: NCBI …	.					2.54433			4.34958	2.63197							3.09246			1.34101				-3.14282	-3.98896
	AT3G03480		acetyl CoA:(Z)-3-hexen-1-ol acetyltransferase acetyl CoA:(Z)-3-hexen-1-ol acetyltransferase (CHAT); CONTAINS InterPro DOMAIN/s: Transferase (InterPro:IPR003480); BEST Arabidopsis thaliana protein match is: HXXXD-type acyl-transferase family protein (TAIR:AT5G17540.1); Has 2522 Blast hits to 2511 proteins in 130 species: Archae - 0; Bacteria - 0; Metazoa - 0; Fungi - 44; Plants - 2476; Viruses - 0…	.								1.39113	-3.35153		-1.20949										1.06792	-5.29778		-1.52798
	AT3G03660	WOX11	WUSCHEL related homeobox 11 Encodes a WUSCHEL-related homeobox gene family member with 65 amino acids in its homeodomain. Proteins in this family contain a sequence of eight residues (TLPLFPMH) downstream of the homeodomain called the WUS box. WUSCHEL related homeobox 11 (WOX11); FUNCTIONS IN: DNA binding, sequence-specific DNA binding transcription factor activity; INVOLVED IN: regulation of tra…	.					2.15594	3.3964							1.42255			2.45688	1.7001					5.31316
	AT3G05610		Plant invertase/pectin methylesterase inhibitor superfamily Plant invertase/pectin methylesterase inhibitor superfamily; FUNCTIONS IN: enzyme inhibitor activity, pectinesterase activity; INVOLVED IN: cell wall modification; LOCATED IN: cell wall, plant-type cell wall; EXPRESSED IN: 11 plant structures; EXPRESSED DURING: L mature pollen stage, M germinated pollen stage, 4 anthesis, C globular stag…	.									1.24032	2.1833	6.50992									-1.54472	-6.79346
	AT3G05770		unknown protein; BEST Arabidopsis thaliana protein match is: unknown protein (TAIR:AT1G54300.1); Has 105 Blast hits to 105 proteins in 16 species: Archae - 0; Bacteria - 0; Metazoa - 0; Fungi - 0; Plants - 99; Viruses - 0; Other Eukaryotes - 6 (source: NCBI BLink). |	.				4.29987		4.59637										-2.06055		-3.68642
	AT3G16530		Legume lectin family protein Lectin like protein whose expression is induced upon treatment with chitin oligomers. Legume lectin family protein; FUNCTIONS IN: carbohydrate binding, binding; INVOLVED IN: response to chitin; LOCATED IN: apoplast, cell wall, nucleus, plant-type cell wall; EXPRESSED IN: 16 plant structures; EXPRESSED DURING: 9 growth stages; CONTAINS InterPro DOMAIN/s: Legume lectin,…	.				1.38603		2.57006									-1.56924		1.16738	-2.05946
	AT3G22231	PCC1	pathogen and circadian controlled 1 Encodes a member of a novel 6 member Arabidopsis gene family. Expression of PCC1 is regulated by the circadian clock and is upregulated in response to both virulent and avirulent strains of Pseudomonas syringae pv. tomato. PATHOGEN AND CIRCADIAN CONTROLLED 1 (PCC1); FUNCTIONS IN: molecular_function unknown; INVOLVED IN: response to fungus, response to bacterium…	.								-2.55862	1.27222		3.83798		-3.18657								-2.51406	3.80474	1.80175	3.89198
	AT3G22235		FUNCTIONS IN: molecular_function unknown; INVOLVED IN: biological_process unknown; BEST Arabidopsis thaliana protein match is: pathogen and circadian controlled 1 (TAIR:AT3G22231.1); Has 122 Blast hits to 122 proteins in 11 species: Archae - 0; Bacteria - 0; Metazoa - 0; Fungi - 0; Plants - 122; Viruses - 0; Other Eukaryotes - 0 (source: NCBI BLink). |	.								-2.20959	1.55082		3.30625		-3.80182		-2.4386			-2.86639			-1.99615	3.41436	1.5833	3.53039
	AT3G28780	DUF1216	Protein of unknown function (DUF1216) Protein of unknown function (DUF1216); FUNCTIONS IN: molecular_function unknown; INVOLVED IN: pollen exine formation; LOCATED IN: endomembrane system; EXPRESSED IN: 8 plant structures; EXPRESSED DURING: L mature pollen stage, M germinated pollen stage, 4 anthesis, petal differentiation and expansion stage; CONTAINS InterPro DOMAIN/s: Protein of unknown functi…	.								1.03449			2.33347								1.27549	1.01239	-1.02635
	AT3G28917	MIF2	mini zinc finger 2 mini zinc finger 2 (MIF2); CONTAINS InterPro DOMAIN/s: ZF-HD homeobox protein, Cys/His-rich dimerisation domain (InterPro:IPR006456); BEST Arabidopsis thaliana protein match is: mini zinc finger (TAIR:AT1G18835.1); Has 35333 Blast hits to 34131 proteins in 2444 species: Archae - 798; Bacteria - 22429; Metazoa - 974; Fungi - 991; Plants - 531; Viruses - 0; Other Eukaryotes - 961…	.									1.4655		5.62263										-5.33601	1.0044
	AT3G29970		B12D protein B12D protein; FUNCTIONS IN: molecular_function unknown; INVOLVED IN: biological_process unknown; LOCATED IN: endomembrane system; EXPRESSED IN: 8 plant structures; EXPRESSED DURING: F mature embryo stage, 4 leaf senescence stage, petal differentiation and expansion stage, E expanded cotyledon stage, D bilateral stage; CONTAINS InterPro DOMAIN/s: B12D (InterPro:IPR010530); BEST Arabid…	.					7.52999	8.35184										10.0948	8.48104
	AT3G42658.1		AT3G42658.1 transposable_element_gene transposable element gene Member of Sadhu non-coding retrotransposon family.In some natural accessions the allele is methylated and silenced. |	.				2.60516	2.16258		-1.73503							3.02055	3.36984
	AT3G43190	SUS4	sucrose synthase 4 Encodes a protein with sucrose synthase activity (SUS4). sucrose synthase 4 (SUS4); FUNCTIONS IN: UDP-glycosyltransferase activity, sucrose synthase activity, transferase activity, transferring glycosyl groups; INVOLVED IN: sucrose biosynthetic process, response to hypoxia; LOCATED IN: plasma membrane, vacuole, membrane; EXPRESSED IN: 15 plant structures; EXPRESSED DURING: 6 gr…	.					2.89663	1.92211	-2.73117			-1.06317					2.2427	4.24915	2.13087
	AT3G43670		Copper amine oxidase family protein Copper amine oxidase family protein; FUNCTIONS IN: primary amine oxidase activity, quinone binding, copper ion binding; INVOLVED IN: oxidation reduction, amine metabolic process; LOCATED IN: endomembrane system; EXPRESSED IN: 20 plant structures; EXPRESSED DURING: 13 growth stages; CONTAINS InterPro DOMAIN/s: Copper amine oxidase, N-terminal (InterPro:IPR016182…	.									-2.63796		-1.04218		-1.01936						-1.6866			-4.5812		-1.1626
	AT3G44260		Polynucleotidyl transferase, ribonuclease H-like superfamily protein Polynucleotidyl transferase, ribonuclease H-like superfamily protein; FUNCTIONS IN: ribonuclease activity, nucleic acid binding; INVOLVED IN: response to biotic stimulus, response to wounding, RNA modification; LOCATED IN: nucleus; EXPRESSED IN: 22 plant structures; EXPRESSED DURING: 12 growth stages; CONTAINS InterPro DOMAIN/s:…	.				-1.05966	1.62541	-1.09671	-1.74767	-2.66493		-1.47285	1.16449		-2.10516						-2.47011	-1.21435	-2.88173
	AT3G48080		alpha/beta-Hydrolases superfamily protein alpha/beta-Hydrolases superfamily protein; FUNCTIONS IN: lipase activity, triglyceride lipase activity, signal transducer activity; INVOLVED IN: lipid metabolic process; LOCATED IN: cellular_component unknown; EXPRESSED IN: 19 plant structures; EXPRESSED DURING: 12 growth stages; CONTAINS InterPro DOMAIN/s: Lipase, class 3 (InterPro:IPR002921); BEST Arabi…	.									1.02793		2.01639										-1.10784	1.93479		1.83429
	AT3G48360	BT2	BTB and TAZ domain protein 2 encodes a protein (BT2) that is an essential component of the TAC1-mediated telomerase activation pathway. Acts redundantly with BT3 and BT1 during female gametophyte development and with BT3 during male gametophyte development. BT2 also mediates multiple responses to nutrients, stresses, and hormones. BTB and TAZ domain protein 2 (BT2); CONTAINS InterPro DOMAIN/s: BT…	.								-2.21132	-1.00698				-1.45963						-1.11757		-1.70296		1.33617	1.15776
	AT3G48520	CYP93B3	cytochrome P450, family 94, subfamily B, polypeptide 3 member of CYP94B "cytochrome P450, family 94, subfamily B, polypeptide 3" (CYP94B3); FUNCTIONS IN: electron carrier activity, monooxygenase activity, iron ion binding, oxygen binding, heme binding; INVOLVED IN: oxidation reduction; LOCATED IN: endomembrane system; EXPRESSED IN: 14 plant structures; EXPRESSED DURING: 7 growth stages; CONTAINS …	.					1.62688			-5.43325	-1.9503	-3.44509	7.28117					2.55111	1.39199		-2.04324	-3.23897	-7.95095			4.78405
	AT3G49160		pyruvate kinase family protein Expression of the gene is downregulated in the presence of paraquat, an inducer of photoxidative stress. pyruvate kinase family protein; FUNCTIONS IN: pyruvate kinase activity, magnesium ion binding, potassium ion binding, catalytic activity; INVOLVED IN: glycolysis; LOCATED IN: cellular_component unknown; EXPRESSED IN: 24 plant structures; EXPRESSED DURING: 15 grow…	.									-4.08638		-1.65647								-2.4339			-7.05586		-2.42393
	AT3G52970	CYP76G	cytochrome P450, family 76, subfamily G, polypeptide 1 member of CYP76G "cytochrome P450, family 76, subfamily G, polypeptide 1" (CYP76G1); FUNCTIONS IN: electron carrier activity, monooxygenase activity, iron ion binding, oxygen binding, heme binding; INVOLVED IN: oxidation reduction; LOCATED IN: endomembrane system; EXPRESSED IN: stem, root; CONTAINS InterPro DOMAIN/s: Cytochrome P450 (InterPro…	.				-3.77366		-2.70783	-1.41776						-4.69799		1.71266			4.06433
	AT3G53300	CYP71B31	cytochrome P450, family 71, subfamily B, polypeptide 31 putative cytochrome P450 "cytochrome P450, family 71, subfamily B, polypeptide 31" (CYP71B31); FUNCTIONS IN: electron carrier activity, monooxygenase activity, iron ion binding, oxygen binding, heme binding; INVOLVED IN: oxidation reduction; EXPRESSED IN: sepal, male gametophyte, carpel, stamen; EXPRESSED DURING: 4 anthesis, petal differenti…	.								3.52384	1.74247		5.91599											-1.45943	-3.36916	-3.00781
	AT3G56400	WRKY70	WRKY DNA-binding protein 70 member of WRKY Transcription Factor; Group III. Function as activator of SA-dependent defense genes and a repressor of JA-regulated genes. WRKY70-controlled suppression of JA-signaling is partly executed by NPR1. WRKY DNA-binding protein 70 (WRKY70); CONTAINS InterPro DOMAIN/s: DNA-binding WRKY (InterPro:IPR003657); BEST Arabidopsis thaliana protein match is: WRKY DNA-…	.					1.33929			-1.02502	1.09986		2.04882		-2.331		-1.94551						-1.50308	1.44762		1.57777
	AT3G56710	SIB1	sigma factor binding protein 1 Sig1 binding protein; interacts with Sig1R4. As well as Sig1, SibI is imported into chloroplasts and its expression is light-dependent in mature chloroplasts. sigma factor binding protein 1 (SIB1); CONTAINS InterPro DOMAIN/s: VQ (InterPro:IPR008889); BEST Arabidopsis thaliana protein match is: VQ motif-containing protein (TAIR:AT2G41180.1); Has 66 Blast hits to 66 p…	.				-1.02906				-1.30714	1.15518		2.26686		-1.13463								-1.89365	1.63271		1.68805
	AT3G59845		Zinc-binding dehydrogenase family protein Zinc-binding dehydrogenase family protein; FUNCTIONS IN: oxidoreductase activity, binding, catalytic activity, zinc ion binding; INVOLVED IN: response to oxidative stress; EXPRESSED IN: 8 plant structures; EXPRESSED DURING: 4 anthesis, C globular stage, petal differentiation and expansion stage, E expanded cotyledon stage, D bilateral stage; CONTAINS Inte…	.									1.3636		2.42676										-2.29033		-1.52914
	AT3G61400		2-oxoglutarate (2OG) and Fe(II)-dependent oxygenase superfamily protein 1-aminocyclopropane-1-carboxylate oxidase-like protein 2-oxoglutarate (2OG) and Fe(II)-dependent oxygenase superfamily protein; CONTAINS InterPro DOMAIN/s: Oxoglutarate/iron-dependent oxygenase (InterPro:IPR005123); BEST Arabidopsis thaliana protein match is: 2-oxoglutarate (2OG) and Fe(II)-dependent oxygenase superfamily pro…	.				3.7664		1.32804										-1.67675	-1.03245	-2.10825
	AT3G62710		Glycosyl hydrolase family protein Glycosyl hydrolase family protein; FUNCTIONS IN: xylan 1,4-beta-xylosidase activity, hydrolase activity, hydrolyzing O-glycosyl compounds; INVOLVED IN: carbohydrate metabolic process; LOCATED IN: endomembrane system; EXPRESSED IN: 14 plant structures; EXPRESSED DURING: L mature pollen stage, M germinated pollen stage, 4 anthesis, C globular stage, petal different…	.										2.50078	5.8398									-1.82691	-6.11336
	AT4G00700		C2 calcium/lipid-binding plant phosphoribosyltransferase family protein C2 calcium/lipid-binding plant phosphoribosyltransferase family protein; CONTAINS InterPro DOMAIN/s: C2 membrane targeting protein (InterPro:IPR018029), C2 calcium/lipid-binding domain, CaLB (InterPro:IPR008973), Phosphoribosyltransferase C-terminal (InterPro:IPR013583), C2 calcium-dependent membrane targeting (InterPro:IPR00…	.								1.16101		1.5153									1.64574					-1.52825
	AT4G01980.1		AT4G01980.1 transposable_element_gene transposable element gene similar to myb family protein [Arabidopsis thaliana] (TAIR:AT2G22710.1); similar to hypothetical protein 26.t00020 [Brassica oleracea] (GB:ABD65000.1); contains InterPro domain Homeodomain-related; (InterPro:IPR012287); contains InterPro domain Homeodomain-like; (InterPro:IPR009057); contains InterPro domain Myb, DNA-binding; (InterP…	.					5.21169	6.71423	5.16149		2.24422	2.17495						5.85636	5.00647	5.89762				1.41599
	AT4G03290		EF hand calcium-binding protein family EF hand calcium-binding protein family; FUNCTIONS IN: calcium ion binding; INVOLVED IN: response to cold; LOCATED IN: nucleus, cytoplasm; EXPRESSED IN: 9 plant structures; EXPRESSED DURING: L mature pollen stage, M germinated pollen stage, 4 anthesis, C globular stage, petal differentiation and expansion stage; CONTAINS InterPro DOMAIN/s: EF-Hand 1, calcium-…	.									1.48899	2.88579	6.96435									-2.04646	-7.20931
	AT4G10270		Wound-responsive family protein Wound-responsive family protein; CONTAINS InterPro DOMAIN/s: Protein of unknown function wound-induced (InterPro:IPR022251); BEST Arabidopsis thaliana protein match is: Wound-responsive family protein (TAIR:AT4G10265.1); Has 183 Blast hits to 182 proteins in 16 species: Archae - 0; Bacteria - 0; Metazoa - 0; Fungi - 0; Plants - 183; Viruses - 0; Other Eukaryotes - …	.					3.45162	1.64429	-3.83094						1.88623		3.77404	4.84713	1.73239					1.14269
	AT4G12470	AZI1	azelaic acid induced 1 Encodes AZI1 (AZELAIC ACID INDUCED 1). Involved in the priming of salicylic acid induction and systemic immunity triggered by pathogen or azelaic acid. azelaic acid induced 1 (AZI1); FUNCTIONS IN: lipid binding; INVOLVED IN: systemic acquired resistance, defense response to fungus, lipid transport; LOCATED IN: endomembrane system; EXPRESSED IN: 12 plant structures; EXPRESSE…	.					5.32774	4.64823							2.59071			7.24639	3.37017					1.33258		1.77697
	AT4G12480		Bifunctional inhibitor/lipid-transfer protein/seed storage 2S albumin superfamily protein a putative lipid transfer protein, vernalization-responsive and cold-induced pEARLI 1; FUNCTIONS IN: lipid binding; INVOLVED IN: defense response to fungus, lipid transport; LOCATED IN: endomembrane system; EXPRESSED IN: 6 plant structures; EXPRESSED DURING: LP.06 six leaves visible, LP.04 four leaves visibl…	.					5.09383	4.55082							4.34849			8.16251	4.11293
	AT4G13395		ROTUNDIFOLIA like 12 ROTUNDIFOLIA like 12 (RTFL12); CONTAINS InterPro DOMAIN/s: DVL (InterPro:IPR012552); BEST Arabidopsis thaliana protein match is: ROTUNDIFOLIA like 10 (TAIR:AT3G14362.1); Has 139 Blast hits to 139 proteins in 12 species: Archae - 0; Bacteria - 0; Metazoa - 0; Fungi - 0; Plants - 139; Viruses - 0; Other Eukaryotes - 0 (source: NCBI BLink). |	.				-1.51176	2.50899	-1.28588	-1.35492	-3.51082			2.50851		-2.21581			1.81444			-2.14344	-1.60521	-3.59408			2.4298
	AT4G14390		Ankyrin repeat family protein Ankyrin repeat family protein; FUNCTIONS IN: molecular_function unknown; INVOLVED IN: biological_process unknown; LOCATED IN: cellular_component unknown; EXPRESSED IN: 19 plant structures; EXPRESSED DURING: 8 growth stages; CONTAINS InterPro DOMAIN/s: Ankyrin repeat-containing domain (InterPro:IPR020683), Ankyrin repeat (InterPro:IPR002110); BEST Arabidopsis thaliana…	.									1.53773		2.91443											1.67344		1.87079
	AT4G14400		ankyrin repeat family protein encodes a novel protein with putative ankyrin and transmembrane regions. It is a member of one of the largest uncharacterized gene families in higher plants. The gene is involved in resistance to Pseudomonas syringae. ACCELERATED CELL DEATH 6 (ACD6); CONTAINS InterPro DOMAIN/s: Ankyrin repeat-containing domain (InterPro:IPR020683), Ankyrin repeat (InterPro:IPR002110)…	.								-1.07317	1.03216		2.43429										-1.37447	1.917		2.13973
	AT4G15100	SPCL30	serine carboxypeptidase-like 30 serine carboxypeptidase-like 30 (scpl30); FUNCTIONS IN: serine-type carboxypeptidase activity; INVOLVED IN: proteolysis; LOCATED IN: endomembrane system; EXPRESSED IN: root, flower; EXPRESSED DURING: petal differentiation and expansion stage; CONTAINS InterPro DOMAIN/s: Peptidase S10, serine carboxypeptidase (InterPro:IPR001563), Peptidase S10, serine carboxypeptid…	.				3.96544		3.19311										-3.57982		-4.5613
	AT4G18190	PUP6	purine permease 6 Member of a family of proteins related to PUP1, a purine transporter. May be involved in the transport of purine and purine derivatives such as cytokinins, across the plasma membrane. purine permease 6 (PUP6); CONTAINS InterPro DOMAIN/s: Protein of unknown function DUF250 (InterPro:IPR004853); BEST Arabidopsis thaliana protein match is: Drug/metabolite transporter superfamily pr…	.									1.32075		2.0311										-2.34995	1.17179
	AT4G19760		Glycosyl hydrolase family protein with chitinase insertion domain Glycosyl hydrolase family protein with chitinase insertion domain; FUNCTIONS IN: cation binding, chitinase activity, hydrolase activity, hydrolyzing O-glycosyl compounds, catalytic activity; INVOLVED IN: carbohydrate metabolic process; LOCATED IN: cellular_component unknown; CONTAINS InterPro DOMAIN/s: Glycoside hydrolase, family 1…	.				1.05389		2.18319	1.35278								-1.18351	-1.35572	1.24383
	AT4G21680	NRT1.8	NITRATE TRANSPORTER 1.8 Encodes a nitrate transporter (NRT1.8). Functions in nitrate removal from the xylem sap. Mediates cadmium tolerance. NITRATE TRANSPORTER 1.8 (NRT1.8); FUNCTIONS IN: transporter activity, nitrate transmembrane transporter activity; INVOLVED IN: response to cadmium ion, oligopeptide transport, response to nitrate; LOCATED IN: plasma membrane, membrane; EXPRESSED IN: 9 plant …	.				1.54218		3.63969							3.2752		-1.62265		1.29902	-2.62005
	AT4G23496	SPIL5	SPIRAL1-like5 Belongs to a six-member gene family in Arabidopsis; all members share high sequence similarity in amino- and carboxy-terminal regions. Regulates cortical microtubule organization. Mutant plants exhibit altered patterns of root, leaf and petal growth as a result of defective anisotropic cell expansion. SPIRAL1-like5 (SP1L5); BEST Arabidopsis thaliana protein match is: SPIRAL1-like2 (…	.									1.9905		1.5202										-1.68414	1.5257	-1.59661
	AT4G27280		Calcium-binding EF-hand family protein Calcium-binding EF-hand family protein; FUNCTIONS IN: calcium ion binding; INVOLVED IN: response to karrikin; EXPRESSED IN: 23 plant structures; EXPRESSED DURING: 13 growth stages; CONTAINS InterPro DOMAIN/s: EF-Hand 1, calcium-binding site (InterPro:IPR018247), EF-HAND 2 (InterPro:IPR018249), EF-hand-like domain (InterPro:IPR011992); BEST Arabidopsis thalia…	.				-1.03005	1.20661	-1.24643		-2.38845		-1.26329			-1.70334						-1.81996	-1.2353	-2.50584	1.09045
	AT4G27450		Aluminium induced protein with YGL and LRDR motifs Aluminium induced protein with YGL and LRDR motifs; FUNCTIONS IN: molecular_function unknown; INVOLVED IN: biological_process unknown; LOCATED IN: cytosol, nucleus, plasma membrane; EXPRESSED IN: 25 plant structures; EXPRESSED DURING: 14 growth stages; BEST Arabidopsis thaliana protein match is: Aluminium induced protein with YGL and LRDR motifs …	.					2.05501	1.03297	-1.75012								1.34968	2.46745	1.37357
	AT4G27652		unknown protein; BEST Arabidopsis thaliana protein match is: unknown protein (TAIR:AT4G27657.1); Has 30201 Blast hits to 17322 proteins in 780 species: Archae - 12; Bacteria - 1396; Metazoa - 17338; Fungi - 3422; Plants - 5037; Viruses - 0; Other Eukaryotes - 2996 (source: NCBI BLink). |	.					1.58783	-1.39758	-1.91144	-1.8974			1.39735		-1.08873						-1.89791	-1.50158	-2.23946			1.0612
	AT4G28811		basic helix-loop-helix (bHLH) DNA-binding superfamily protein basic helix-loop-helix (bHLH) DNA-binding superfamily protein; FUNCTIONS IN: transcription regulator activity; INVOLVED IN: regulation of transcription; LOCATED IN: nucleus; CONTAINS InterPro DOMAIN/s: Helix-loop-helix DNA-binding domain (InterPro:IPR001092), Helix-loop-helix DNA-binding (InterPro:IPR011598); BEST Arabidopsis thaliana …	.					5.00295	4.83825										8.07097	6.86309
	AT4G31940	CYP82C4	cytochrome P450, family 82, subfamily C, polypeptide 4 member of CYP82C "cytochrome P450, family 82, subfamily C, polypeptide 4" (CYP82C4); FUNCTIONS IN: electron carrier activity, monooxygenase activity, iron ion binding, oxygen binding, heme binding; INVOLVED IN: oxidation reduction; LOCATED IN: endomembrane system; EXPRESSED IN: root; CONTAINS InterPro DOMAIN/s: Cytochrome P450 (InterPro:IPR00…	.				-1.85624	-2.09293	5.42282	5.40293						1.38488	-6.65624	-3.0577	1.14625		4.21148
	AT4G33070		Thiamine pyrophosphate dependent pyruvate decarboxylase family protein Thiamine pyrophosphate dependent pyruvate decarboxylase family protein; FUNCTIONS IN: in 6 functions; LOCATED IN: membrane; EXPRESSED IN: 11 plant structures; EXPRESSED DURING: 4 anthesis, C globular stage, F mature embryo stage, petal differentiation and expansion stage, E expanded cotyledon stage; CONTAINS InterPro DOMAIN/s:…	.					4.10335	2.16333	-3.20704		1.11925						3.21504	4.693	2.51542					1.83998
	AT4G33560		Wound-responsive family protein Wound-responsive family protein; CONTAINS InterPro DOMAIN/s: Protein of unknown function wound-induced (InterPro:IPR022251); BEST Arabidopsis thaliana protein match is: wound-responsive protein-related (TAIR:AT2G14070.1); Has 146 Blast hits to 145 proteins in 15 species: Archae - 0; Bacteria - 0; Metazoa - 0; Fungi - 0; Plants - 146; Viruses - 0; Other Eukaryotes -…	.					5.15583	1.93373	-4.03463						1.82693		4.67116	6.42064	2.50197
	AT4G33970		Leucine-rich repeat (LRR) family protein Leucine-rich repeat (LRR) family protein; FUNCTIONS IN: structural constituent of cell wall; LOCATED IN: endomembrane system; EXPRESSED IN: 6 plant structures; EXPRESSED DURING: L mature pollen stage, M germinated pollen stage, 4 anthesis; BEST Arabidopsis thaliana protein match is: Leucine-rich repeat (LRR) family protein (TAIR:AT2G15880.1); Has 345457 Bl…	.									1.68699		2.66917		-1.36767								-3.02029
	AT5G03350		Legume lectin family protein Legume lectin family protein; FUNCTIONS IN: carbohydrate binding, binding; INVOLVED IN: biological_process unknown; LOCATED IN: apoplast, cell wall, chloroplast; EXPRESSED IN: 19 plant structures; EXPRESSED DURING: 12 growth stages; CONTAINS InterPro DOMAIN/s: Legume lectin, beta chain (InterPro:IPR001220), Concanavalin A-like lectin/glucanase, subgroup (InterPro:IPR0…	.								-1.13775	1.43068		2.97709										-1.68069	2.0453		2.43628
	AT5G05250		unknown protein; BEST Arabidopsis thaliana protein match is: unknown protein (TAIR:AT3G56360.1); Has 30201 Blast hits to 17322 proteins in 780 species: Archae - 12; Bacteria - 1396; Metazoa - 17338; Fungi - 3422; Plants - 5037; Viruses - 0; Other Eukaryotes - 2996 (source: NCBI BLink). |	.					1.24056		1.27069	-3.43539	1.94751	1.51033	2.03296			-1.56617		2.85657		1.29178	1.29132	-1.84838		6.65216	3.12853	5.02487
	AT5G06870	PGIP2	polygalacturonase inhibiting protein 2 Encodes a polygalacturonase inhibiting protein involved in plant defense response. PGIPs inhibit the activity of pectin degrading enzymes such as those produced by fungal pathogens. PGIP2 is induced by fungal infection and methyl jasmonate. polygalacturonase inhibiting protein 2 (PGIP2); FUNCTIONS IN: polygalacturonase inhibitor activity; INVOLVED IN: respon…	.				2.07221		2.49337										-3.27605		-2.56397
	AT5G06900	CYP93D1	cytochrome P450, family 93, subfamily D, polypeptide 1 member of CYP93D "cytochrome P450, family 93, subfamily D, polypeptide 1" (CYP93D1); FUNCTIONS IN: electron carrier activity, monooxygenase activity, iron ion binding, oxygen binding, heme binding; INVOLVED IN: oxidation reduction; LOCATED IN: endomembrane system; EXPRESSED IN: root; CONTAINS InterPro DOMAIN/s: Cytochrome P450 (InterPro:IPR00…	.				-2.69199		-3.16682	-1.29175						-1.54611		1.52005			2.91711
	AT5G06905	CYP712A2	cytochrome P450, family 712, subfamily A, polypeptide 2 member of CYP712A "cytochrome P450, family 712, subfamily A, polypeptide 2" (CYP712A2); FUNCTIONS IN: electron carrier activity, monooxygenase activity, iron ion binding, oxygen binding, heme binding; INVOLVED IN: oxidation reduction; CONTAINS InterPro DOMAIN/s: Cytochrome P450 (InterPro:IPR001128), Cytochrome P450, conserved site (InterPro:…	.				-3.38114		-3.94108	-1.75371						-2.50351		1.69066			3.31371
	AT5G08250		Cytochrome P450 superfamily protein Cytochrome P450 superfamily protein; FUNCTIONS IN: electron carrier activity, monooxygenase activity, iron ion binding, oxygen binding, heme binding; INVOLVED IN: oxidation reduction; LOCATED IN: cellular_component unknown; EXPRESSED IN: male gametophyte, flower; EXPRESSED DURING: 4 anthesis, petal differentiation and expansion stage; CONTAINS InterPro DOMAIN/s…	.				-2.11234		-2.72395							-2.10195		-1.38405
	AT5G09570		Cox19-like CHCH family protein Cox19-like CHCH family protein; FUNCTIONS IN: molecular_function unknown; INVOLVED IN: biological_process unknown; LOCATED IN: chloroplast; EXPRESSED IN: 23 plant structures; EXPRESSED DURING: 14 growth stages; CONTAINS InterPro DOMAIN/s: CHCH (InterPro:IPR010625); BEST Arabidopsis thaliana protein match is: unknown protein (TAIR:AT5G64400.1); Has 185 Blast hits to …	.					5.86225	5.29043			1.89335							3.71242	1.85693					2.18938
	AT5G10040		unknown protein; BEST Arabidopsis thaliana protein match is: unknown protein (TAIR:AT5G65207.1); Has 1807 Blast hits to 1807 proteins in 277 species: Archae - 0; Bacteria - 0; Metazoa - 736; Fungi - 347; Plants - 385; Viruses - 0; Other Eukaryotes - 339 (source: NCBI BLink). |	.					7.69784	9.5868	-5.01976								3.76941	8.72368	7.12169
	AT5G13170	SAG29	senescence-associated gene 29 senescence-associated gene 29 (SAG29); LOCATED IN: endomembrane system, integral to membrane, membrane; EXPRESSED IN: 13 plant structures; EXPRESSED DURING: LP.04 four leaves visible, 4 anthesis, C globular stage, petal differentiation and expansion stage; CONTAINS InterPro DOMAIN/s: MtN3/saliva-related transmembrane protein, conserved region (InterPro:IPR018169), RA…	.								2.19623	2.53176														-2.43197	-2.40544
	AT5G17170	ENH1	rubredoxin family protein enhancer of sos3-1 (ENH1); FUNCTIONS IN: metal ion binding; LOCATED IN: chloroplast thylakoid membrane, chloroplast; EXPRESSED IN: 22 plant structures; EXPRESSED DURING: 14 growth stages; CONTAINS InterPro DOMAIN/s: PDZ/DHR/GLGF (InterPro:IPR001478); BEST Arabidopsis thaliana protein match is: protein containing PDZ domain, a K-box domain, and a TPR region (TAIR:AT1G5548…	.									-2.65577		-1.33129											-4.05369		-1.4295
	AT5G19110		Eukaryotic aspartyl protease family protein Eukaryotic aspartyl protease family protein; FUNCTIONS IN: aspartic-type endopeptidase activity; INVOLVED IN: proteolysis, N-terminal protein myristoylation; LOCATED IN: endomembrane system; EXPRESSED IN: shoot apex, leaf apex, hypocotyl, root, leaf; CONTAINS InterPro DOMAIN/s: Peptidase aspartic (InterPro:IPR021109), Peptidase aspartic, catalytic (Inte…	.				2.10245		1.08876			-2.40928				1.06714			-1.38173		-1.65701
	AT5G20820		SAUR-like auxin-responsive protein family SAUR-like auxin-responsive protein family ; CONTAINS InterPro DOMAIN/s: Auxin responsive SAUR protein (InterPro:IPR003676); BEST Arabidopsis thaliana protein match is: SAUR-like auxin-responsive protein family (TAIR:AT1G72430.1); Has 120 Blast hits to 120 proteins in 13 species: Archae - 0; Bacteria - 0; Metazoa - 0; Fungi - 0; Plants - 120; Viruses - 0; …	.					1.36934	2.07404											1.22653	-1.88562
	AT5G24640		unknown protein; BEST Arabidopsis thaliana protein match is: unknown protein (TAIR:AT2G41730.1); Has 1807 Blast hits to 1807 proteins in 277 species: Archae - 0; Bacteria - 0; Metazoa - 736; Fungi - 347; Plants - 385; Viruses - 0; Other Eukaryotes - 339 (source: NCBI BLink). |	.					2.90337	6.29561										5.52752	4.60014
	AT5G28510	BGLU24	beta glucosidase 24 beta glucosidase 24 (BGLU24); FUNCTIONS IN: cation binding, hydrolase activity, hydrolyzing O-glycosyl compounds, catalytic activity; INVOLVED IN: carbohydrate metabolic process; LOCATED IN: endomembrane system; CONTAINS InterPro DOMAIN/s: Glycoside hydrolase, family 1 (InterPro:IPR001360), Glycoside hydrolase, family 1, active site (InterPro:IPR018120), Glycoside hydrolase, c…	.				1.3554	1.72888	2.16306							1.34842			1.73176	1.30555	-1.87201
	AT5G42180		Peroxidase superfamily protein Peroxidase superfamily protein; FUNCTIONS IN: peroxidase activity, heme binding; INVOLVED IN: oxidation reduction, response to oxidative stress; LOCATED IN: plant-type cell wall; EXPRESSED IN: 10 plant structures; EXPRESSED DURING: 4 anthesis, C globular stage, petal differentiation and expansion stage; CONTAINS InterPro DOMAIN/s: Haem peroxidase (InterPro:IPR010255…	.									3.53167	-2.02553	7.48883								-1.46554	-2.02759	-7.83413	1.96759	-4.09696
	AT5G45340	CYP707A3	cytochrome P450, family 707, subfamily A, polypeptide 3 Encodes a protein with ABA 8'-hydroxylase activity; involved in ABA catabolism. Mutant analyses show that disruption in the gene results in more drought tolerance whereas overexpression results in increased transpiration rate and reduced drought tolerance. Gene involved in postgermination growth. Plant P450 CYP707A3, ABA 8'-hydroxylase, bind…	.								-3.20209	2.04827	-1.85631									-2.72315	-1.61138	-3.3364	2.51611
	AT5G48140		Pectin lyase-like superfamily protein Pectin lyase-like superfamily protein; FUNCTIONS IN: polygalacturonase activity; INVOLVED IN: carbohydrate metabolic process; LOCATED IN: endomembrane system; EXPRESSED IN: 12 plant structures; EXPRESSED DURING: 6 growth stages; CONTAINS InterPro DOMAIN/s: Pectin lyase fold/virulence factor (InterPro:IPR011050), Pectin lyase fold (InterPro:IPR012334), Glycosi…	.										2.24161	6.13077									-1.52336	-6.21934
	AT5G48560		basic helix-loop-helix (bHLH) DNA-binding superfamily protein basic helix-loop-helix (bHLH) DNA-binding superfamily protein; FUNCTIONS IN: DNA binding, sequence-specific DNA binding transcription factor activity; INVOLVED IN: regulation of transcription; LOCATED IN: nucleus; EXPRESSED IN: 14 plant structures; EXPRESSED DURING: LP.06 six leaves visible, LP.04 four leaves visible, 4 anthesis, petal…	.									1.52289	-1.33627	2.22411										-2.00888	1.20794	-1.99332
	AT5G51190		Integrase-type DNA-binding superfamily protein encodes a member of the ERF (ethylene response factor) subfamily B-3 of ERF/AP2 transcription factor family. The protein contains one AP2 domain. There are 18 members in this subfamily including ATERF-1, ATERF-2, AND ATERF-5. Integrase-type DNA-binding superfamily protein; CONTAINS InterPro DOMAIN/s: DNA-binding, integrase-type (InterPro:IPR016177), …	.				-1.43284	1.21227	-1.5854	-1.56701	-2.34334		-1.3992			-2.34584						-2.18058	-1.22204	-3.41842
	AT5G51720		2 iron, 2 sulfur cluster binding 2 iron, 2 sulfur cluster binding; FUNCTIONS IN: 2 iron, 2 sulfur cluster binding; INVOLVED IN: biological_process unknown; LOCATED IN: chloroplast stroma, chloroplast; EXPRESSED IN: 20 plant structures; EXPRESSED DURING: 13 growth stages; CONTAINS InterPro DOMAIN/s: Iron sulphur-containing domain, CDGSH-type (InterPro:IPR018967); Has 30201 Blast hits to 17322 prot…	.									-3.72737		-1.68453								-1.74896			-5.92667		-1.59405
	AT5G51780		basic helix-loop-helix (bHLH) DNA-binding superfamily protein basic helix-loop-helix (bHLH) DNA-binding superfamily protein; FUNCTIONS IN: DNA binding, sequence-specific DNA binding transcription factor activity; INVOLVED IN: regulation of transcription; LOCATED IN: nucleus; CONTAINS InterPro DOMAIN/s: Helix-loop-helix DNA-binding domain (InterPro:IPR001092), Helix-loop-helix DNA-binding (InterPr…	.									1.33382		2.78378										-2.27548		-2.63108
	AT5G53450	ORG1	OBP3-responsive gene 1 OBP3-responsive gene 1 (ORG1); FUNCTIONS IN: structural molecule activity, protein kinase activity, kinase activity, ATP binding; INVOLVED IN: protein amino acid phosphorylation; LOCATED IN: chloroplast; EXPRESSED IN: 23 plant structures; EXPRESSED DURING: 13 growth stages; CONTAINS InterPro DOMAIN/s: Protein kinase, catalytic domain (InterPro:IPR000719), Serine/threonine-p…	.									2.38458	1.16847	1.90628					1.79675						3.83208	1.00809	2.1751
	AT5G54610		ankyrin Induced in response to Salicylic acid. Belongs to the ankyrin repeat protein family. ankyrin (ANK); CONTAINS InterPro DOMAIN/s: Ankyrin repeat-containing domain (InterPro:IPR020683), Ankyrin repeat (InterPro:IPR002110); BEST Arabidopsis thaliana protein match is: Ankyrin repeat family protein (TAIR:AT5G54620.1); Has 16763 Blast hits to 8871 proteins in 442 species: Archae - 14; Bacteria -…	.									1.16499		1.85597											1.8568		1.80082
	AT5G60490	FLA12	FASCICLIN-like arabinogalactan-protein 12 FASCICLIN-like arabinogalactan-protein 12 (FLA12); LOCATED IN: plasma membrane, anchored to membrane; EXPRESSED IN: 22 plant structures; EXPRESSED DURING: 13 growth stages; CONTAINS InterPro DOMAIN/s: FAS1 domain (InterPro:IPR000782); BEST Arabidopsis thaliana protein match is: FASCICLIN-like arabinogalactan-protein 11 (TAIR:AT5G03170.1); Has 1807 Blast h…	.									2.16726	-1.01428	1.82977										-1.68289	1.60723	-1.79555
	AT5G62040		PEBP (phosphatidylethanolamine-binding protein) family protein PEBP (phosphatidylethanolamine-binding protein) family protein; CONTAINS InterPro DOMAIN/s: Phosphatidylethanolamine-binding, conserved site (InterPro:IPR001858), Phosphatidylethanolamine-binding protein PEBP (InterPro:IPR008914); BEST Arabidopsis thaliana protein match is: PEBP (phosphatidylethanolamine-binding protein) family protei…	.								1.19893	-2.17688	1.13417												-3.21924		-1.6602
	AT5G65080	MAF5	K-box region and MADS-box transcription factor family protein Is upregulated during vernalization and regulates flowering time. Encodes MADS-domain protein. Two variants encoding proteins of 198 and 184 amino acids have been reported. MADS AFFECTING FLOWERING 5 (MAF5); FUNCTIONS IN: sequence-specific DNA binding transcription factor activity; INVOLVED IN: negative regulation of flower development…	.				-1.83849		-1.91266	-2.3393	-3.31994	-2.71975	-2.3752	-2.4573										-1.05691
	AT5G65140		Haloacid dehalogenase-like hydrolase (HAD) superfamily protein Haloacid dehalogenase-like hydrolase (HAD) superfamily protein; FUNCTIONS IN: catalytic activity, trehalose-phosphatase activity; INVOLVED IN: response to cadmium ion, trehalose biosynthetic process; EXPRESSED IN: 21 plant structures; EXPRESSED DURING: 14 growth stages; CONTAINS InterPro DOMAIN/s: HAD-superfamily hydrolase, subfamily …	.					2.17871	1.23308							1.55914		1.3013	2.97508

## Sheet: Table S2
								Roots	Roots	Roots	Roots	Roots	Roots	Shoots	Shoots	Shoots	Shoots	Shoots	Shoots
Table S2. Probable Fe-Cu crosstalk-related genes from central Venn diagram in Fig. 4.
Names	total	elements	Gene name	Description		SPL7 regulated	Fit regulated	WT-Fe	WT-Cu	WT-Fe-Cu	spl7-Fe	spl7-Cu	spl7-Fe-Cu	WT-Fe	WT-Cu	WT-Fe-Cu	spl7-Fe	spl7-Cu	spl7-Fe-Cu
Roots Shoots	34	AT4G19690	IRT1	IRT1; iron-regulated transporter 1 Fe(II) transport protein (IRT1) iron-regulated transporter 1 (IRT1); FUNCTIONS IN: manganese ion transmembrane transporter activity, zinc ion transmembrane transporter activity, cadmium ion transmembrane transporter activity, copper uptake transmembrane transporter activity, iron ion transmembrane transporter activity; INVOLVED IN: in 11 processes; LOCATED IN: e…	.	Yes	Yes	1.97089	-3.56977	-2.79385	2.0486		2.28914	1.39846			2.72217
		AT4G34410	RRTF1	redox responsive transcription factor 1 encodes a member of the ERF (ethylene response factor) subfamily B-3 of ERF/AP2 transcription factor family. The protein contains one AP2 domain. There are 18 members in this subfamily including ATERF-1, ATERF-2, AND ATERF-5. redox responsive transcription factor 1 (RRTF1); CONTAINS InterPro DOMAIN/s: DNA-binding, integrase-type (InterPro:IPR016177), Pathog…	.	Yes	Yes	-3.30031		-3.08091	3.42944			-3.86625	-2.73545	-8.33506			5.91549
		AT4G27654		unknown protein; FUNCTIONS IN: molecular_function unknown; INVOLVED IN: biological_process unknown; LOCATED IN: endomembrane system; EXPRESSED IN: 17 plant structures; EXPRESSED DURING: 9 growth stages; Has 30201 Blast hits to 17322 proteins in 780 species: Archae - 12; Bacteria - 1396; Metazoa - 17338; Fungi - 3422; Plants - 5037; Viruses - 0; Other Eukaryotes - 2996 (source: NCBI BLink). |	.	Yes	Yes	-3.26295			2.05515			-4.04975	-2.28971	-5.81493			4.47393
		AT3G56970	bHLH38	BHLH038; basic helix-loop-helix (bHLH) DNA-binding superfamily protein Encodes a member of the basic helix-loop-helix transcription factor family protein. FUNCTIONS IN: DNA binding, sequence-specific DNA binding transcription factor activity; INVOLVED IN: regulation of transcription; LOCATED IN: nucleus; CONTAINS InterPro DOMAIN/s: Achaete-scute transcription factor related (InterPro:IPR015660), …	.	Yes		2.1211	-3.37707	-2.37578	3.81725		1.89596	6.63825			12.9958		5.571
		AT3G56980	bHLH39	BHLH039; basic helix-loop-helix (bHLH) DNA-binding superfamily protein Encodes a member of the basic helix-loop-helix transcription factor protein. FUNCTIONS IN: DNA binding, sequence-specific DNA binding transcription factor activity; INVOLVED IN: regulation of transcription; LOCATED IN: nucleus; EXPRESSED IN: 7 plant structures; EXPRESSED DURING: LP.06 six leaves visible, LP.04 four leaves visi…	.	Yes		1.56431	-1.49677	-1.63879	3.14651		1.94811	6.49415			11.6504		4.73372
		AT2G41240	bHLH100	BHLH100; basic helix-loop-helix protein 100 Encodes a member of the basic helix-loop-helix transcription factor family protein. basic helix-loop-helix protein 100. FUNCTIONS IN: DNA binding, sequence-specific DNA binding transcription factor activity; INVOLVED IN: response to water deprivation, regulation of transcription; LOCATED IN: nucleus; CONTAINS InterPro DOMAIN/s: Achaete-scute transcripti…	.	Yes		2.72403	-3.98806	-3.22523	5.06255		2.43212	4.06271			14.5128	6.45386	9.13895
		AT5G04150	bHLH101	BHLH101; basic helix-loop-helix (bHLH) DNA-binding superfamily protein. FUNCTIONS IN: DNA binding, sequence-specific DNA binding transcription factor activity; INVOLVED IN: regulation of transcription; LOCATED IN: nucleus; EXPRESSED IN: root, leaf; EXPRESSED DURING: LP.04 four leaves visible; CONTAINS InterPro DOMAIN/s: Helix-loop-helix DNA-binding domain (InterPro:IPR001092), Helix-loop-helix DN…	.	Yes		1.34422	-2.49665	-2.06747	2.37801		1.591	1.47465			7.35464		4.52214
		AT1G76650	CML38	calmodulin-like 38 calmodulin-like 38 (CML38); CONTAINS InterPro DOMAIN/s: EF-Hand 1, calcium-binding site (InterPro:IPR018247), EF-HAND 2 (InterPro:IPR018249), EF-hand-like domain (InterPro:IPR011992), Calcium-binding EF-hand (InterPro:IPR002048); BEST Arabidopsis thaliana protein match is: Calcium-binding EF-hand family protein (TAIR:AT1G76640.1). |	.	Yes		-1.58649			1.78296	1.15761		-2.84115	-2.1782	-3.70899	-1.27793		1.4838
		AT1G13609		Defensin-like (DEFL) family protein Encodes a defensin-like (DEFL) family protein. Defensin-like (DEFL) family protein; LOCATED IN: endomembrane system. |	.	Yes		3.78294			8.73959			4.69696	-4.31331		15.1307	7.52557	9.74594
		AT2G14247		Expressed protein Expressed protein; FUNCTIONS IN: molecular_function unknown; INVOLVED IN: biological_process unknown; LOCATED IN: chloroplast; Has 35333 Blast hits to 34131 proteins in 2444 species: Archae - 798; Bacteria - 22429; Metazoa - 974; Fungi - 991; Plants - 531; Viruses - 0; Other Eukaryotes - 9610 (source: NCBI BLink). |	.	Yes		2.4931		1.60413	6.56019			2.69552	-2.45255	-2.50659	11.2186	5.08946	7.40584
		AT5G01600	FER1	ferretin 1 Encodes a ferretin protein that is targeted to the chloroplast. Member of a Ferritin gene family. Gene expression is induced in response to iron overload and by nitric oxide. Expression of the gene is downregulated in the presence of paraquat, an inducer of photoxidative stress. ferretin 1 (FER1); FUNCTIONS IN: ferric iron binding, iron ion binding; INVOLVED IN: in 12 processes; LOCATE…	.	Yes			1.22036		-2.46011		-1.30062	-3.31478		-1.69996	-6.53841		-4.88375
		AT3G22235		FUNCTIONS IN: molecular_function unknown; INVOLVED IN: biological_process unknown; BEST Arabidopsis thaliana protein match is: pathogen and circadian controlled 1 (TAIR:AT3G22231.1); Has 122 Blast hits to 122 proteins in 11 species: Archae - 0; Bacteria - 0; Metazoa - 0; Fungi - 0; Plants - 122; Viruses - 0; Other Eukaryotes - 0 (source: NCBI BLink). |	.	Yes		-3.80182		-2.4386			-2.86639			-1.99615	3.41436	1.5833	3.53039
		AT1G47400	IMA1/FEP3	IMA1/FEP3; unknown protein; BEST Arabidopsis thaliana protein match is: unknown protein (TAIR:AT1G47395.1); Has 11 Blast hits to 11 proteins in 2 species: Archae - 0; Bacteria - 0; Metazoa - 0; Fungi - 0; Plants - 11; Viruses - 0; Other Eukaryotes - 0 (source: NCBI BLink). |	.	Yes			-4.06804	-1.99587	3.86507		1.88308	2.95627	-2.48482		10.8945	4.39315	7.0067
		AT1G47395	IMA2/FEP2	IMA2/FEP2; unknown protein; FUNCTIONS IN: molecular_function unknown; INVOLVED IN: biological_process unknown; LOCATED IN: endomembrane system; BEST Arabidopsis thaliana protein match is: unknown protein (TAIR:AT1G47400.1); Has 9 Blast hits to 9 proteins in 2 species: Archae - 0; Bacteria - 0; Metazoa - 0; Fungi - 0; Plants - 9; Viruses - 0; Other Eukaryotes - 0 (source: NCBI BLink). |	.	Yes			-4.09676	-2.24049	4.70972		2.18233	3.11048	-3.97409		12.0474	5.0789	7.40071
		AT2G30766	IMA3/FEP1	IMA3/FEP1; unknown protein; FUNCTIONS IN: molecular_function unknown; INVOLVED IN: biological_process unknown; LOCATED IN: cellular_component unknown. |	.	Yes		4.50809			5.42354			2.79825	-2.91675		9.53936	5.1246	7.01066
		AT1G12610	DDF1	Integrase-type DNA-binding superfamily protein Encodes a member of the DREB subfamily A-1 of ERF/AP2 transcription factor family (DDF1). The protein contains one AP2 domain. There are six members in this subfamily, including CBF1, CBF2, and CBF3. Overexpression of this gene results in delayed flowering and dwarfism, reduction of gibberellic acid biosynthesis, and increased tolerance to high level…	.	Yes		-3.0661		-6.15096	5.21891			-2.1118	-2.96716	-7.42628			5.19086
		AT2G14560	DUF567	Protein of unknown function (DUF567) Encodes LURP1, a member of the LURP cluster (late upregulated in response to Hyaloperonospora parasitica) which exhibits a pronounced upregulation after recognition of the pathogenic oomycte H. parasitica. LURP1 is required for full basal defense to H. parasitica and resistance to this pathogen mediated by the R-proteins RPP4 and RPP5. LATE UPREGULATED IN RESP…	.	Yes		-3.20606		-2.40091	-2.35728		-1.48614			-2.15341	3.68789	1.48799	2.82526
		AT4G13395		ROTUNDIFOLIA like 12 ROTUNDIFOLIA like 12 (RTFL12); CONTAINS InterPro DOMAIN/s: DVL (InterPro:IPR012552); BEST Arabidopsis thaliana protein match is: ROTUNDIFOLIA like 10 (TAIR:AT3G14362.1); Has 139 Blast hits to 139 proteins in 12 species: Archae - 0; Bacteria - 0; Metazoa - 0; Fungi - 0; Plants - 139; Viruses - 0; Other Eukaryotes - 0 (source: NCBI BLink). |	.	Yes		-2.21581			1.81444			-2.14344	-1.60521	-3.59408			2.4298
		AT1G15010		unknown protein; BEST Arabidopsis thaliana protein match is: unknown protein (TAIR:AT2G01300.1); Has 71 Blast hits to 71 proteins in 13 species: Archae - 0; Bacteria - 2; Metazoa - 0; Fungi - 0; Plants - 69; Viruses - 0; Other Eukaryotes - 0 (source: NCBI BLink). |	.	Yes		-1.81149		-1.82033	1.95064				-2.35913	-2.578			2.0966
		AT5G05250		unknown protein; BEST Arabidopsis thaliana protein match is: unknown protein (TAIR:AT3G56360.1); Has 30201 Blast hits to 17322 proteins in 780 species: Archae - 12; Bacteria - 1396; Metazoa - 17338; Fungi - 3422; Plants - 5037; Viruses - 0; Other Eukaryotes - 2996 (source: NCBI BLink). |	.	Yes			-1.56617		2.85657		1.29178	1.29132	-1.84838		6.65216	3.12853	5.02487
		AT1G21140		Vacuolar iron transporter (VIT) family protein Vacuolar iron transporter (VIT) family protein; CONTAINS InterPro DOMAIN/s: Protein of unknown function DUF125, transmembrane (InterPro:IPR008217); BEST Arabidopsis thaliana protein match is: Vacuolar iron transporter (VIT) family protein (TAIR:AT3G43660.1); Has 1867 Blast hits to 1856 proteins in 645 species: Archae - 60; Bacteria - 1279; Metazoa - …	.	Yes				-1.06138	-2.25062	1.00119		-1.2906			-3.3517		-2.01372
		AT1G80840	WRKY40	WRKY DNA-binding protein 40 Pathogen-induced transcription factor. Binds W-box sequences in vitro. Forms protein complexes with itself and with WRKY40 and WRKY60. Coexpression with WRKY18 or WRKY60 made plants more susceptible to both P. syringae and B. cinerea. WRKY18, WRKY40, and WRKY60 have partially redundant roles in response to the hemibiotrophic bacterial pathogen Pseudomonas syringae and …	.	Yes		-1.4389		-1.38572		1.07652		-3.1289	-2.09047	-4.52781			1.42808
		AT1G74770	BTSL1	BTSL1; zinc ion binding zinc ion binding; FUNCTIONS IN: zinc ion binding; INVOLVED IN: biological_process unknown; LOCATED IN: cellular_component unknown; EXPRESSED IN: hypocotyl, root; CONTAINS InterPro DOMAIN/s: Zinc finger, CTCHY-type (InterPro:IPR017921), Zinc finger, CHY-type (InterPro:IPR008913), Zinc finger, RING-type (InterPro:IPR001841), Haemerythrin/HHE cation-binding motif (InterPro:IP…	.			1.49596	-1.01199		1.69943		1.05877	3.85944			4.58222
		AT1G73805		Calmodulin binding protein-like Calmodulin binding protein-like; CONTAINS InterPro DOMAIN/s: Calmodulin binding protein-like (InterPro:IPR012416); BEST Arabidopsis thaliana protein match is: Calmodulin-binding protein (TAIR:AT5G57580.1); Has 30201 Blast hits to 17322 proteins in 780 species: Archae - 12; Bacteria - 1396; Metazoa - 17338; Fungi - 3422; Plants - 5037; Viruses - 0; Other Eukaryotes …	.			-1.22947		-1.10841	1.07451					-1.67938	1.55118
		AT3G51860	CAX3	cation exchanger 3 cation exchanger 3 (CAX3); CONTAINS InterPro DOMAIN/s: Sodium/calcium exchanger membrane region (InterPro:IPR004837), Calcium/proton exchanger superfamily (InterPro:IPR004798), Calcium/proton exchanger (InterPro:IPR004713); BEST Arabidopsis thaliana protein match is: cation exchanger 1 (TAIR:AT2G38170.1); Has 3567 Blast hits to 3405 proteins in 1022 species: Archae - 24; Bacter…	.			1.49228			1.89679					1.40732	-1.44379
		AT5G23660		homolog of Medicago truncatula MTN3 homolog of the Medicago nodulin MTN3 homolog of Medicago truncatula MTN3 (MTN3); INVOLVED IN: biological_process unknown; LOCATED IN: endomembrane system, integral to membrane, membrane; EXPRESSED IN: 19 plant structures; EXPRESSED DURING: 12 growth stages; CONTAINS InterPro DOMAIN/s: MtN3/saliva-related transmembrane protein, conserved region (InterPro:IPR0181…	.			-1.82986			-1.24084					-1.02364	1.386
		AT2G38340		Integrase-type DNA-binding superfamily protein encodes a member of the DREB subfamily A-2 of ERF/AP2 transcription factor family. The protein contains one AP2 domain. There are eight members in this subfamily including DREB2A AND DREB2B that are involved in response to drought. Integrase-type DNA-binding superfamily protein; FUNCTIONS IN: DNA binding, sequence-specific DNA binding transcription f…	.			1.61583			2.28754			2.49304			2.68629
		AT5G59310		lipid transfer protein 4 Encodes a member of the lipid transfer protein family. Proteins of this family are generally small (~9 kD), basic, expressed abundantly and contain eight Cys residues. The proteins can bind fatty acids and acylCoA esters and can transfer several different phospholipids. They are localized to the cell wall. The mRNA is present in flowers and siliques, and is strongly up-re…	.			-2.92735		-2.60019	4.35578		4.40566			-1.20708		-1.32205	-1.33037
		AT1G52890	NAC19	NAC domain containing protein 19 encodes a NAC transcription factor whose expression is induced by drought, high salt, and abscisic acid. This gene binds to ERD1 promoter in vitro. NAC domain containing protein 19 (NAC019); CONTAINS InterPro DOMAIN/s: No apical meristem (NAM) protein (InterPro:IPR003441); BEST Arabidopsis thaliana protein match is: NAC domain containing protein 3 (TAIR:AT3G15500.…	.			3.84149			3.99771					-1.34507	-1.10269		-1.42397
		AT1G73220	OCT1	organic cation/carnitine transporter1 organic cation/carnitine transporter1 (OCT1); FUNCTIONS IN: carnitine transporter activity, carbohydrate transmembrane transporter activity, transporter activity; INVOLVED IN: transport, transmembrane transport; LOCATED IN: plasma membrane, membrane; EXPRESSED IN: 20 plant structures; EXPRESSED DURING: 4 anthesis, C globular stage, petal differentiation and e…	.			-1.85229	-3.60444	-1.64146	1.92688					-1.2118	1.04286
		AT1G67810	SUFE2	sulfur E2 Encodes a protein capable of stimulating the cysteine desulfurase activity of CpNifS (AT1G08490) in vitro. SufE2:GFP localizes to the chloroplasts where it is likely to play a role in iron-sulfur cluster assembly. Transcript levels for this gene are high in the pollen relative to other organs based on RT-PCR analysis. sulfur E2 (SUFE2); CONTAINS InterPro DOMAIN/s: Fe-S metabolism associ…	.					-1.25806		1.04269				-1.76816	1.21415
		AT1G66960		Terpenoid cyclases family protein Terpenoid cyclases family protein; CONTAINS InterPro DOMAIN/s: Terpene synthase, conserved site (InterPro:IPR002365), Terpenoid cylases/protein prenyltransferase alpha-alpha toroid (InterPro:IPR008930), Squalene cyclase (InterPro:IPR018333), Prenyltransferase/squalene oxidase (InterPro:IPR001330); BEST Arabidopsis thaliana protein match is: lupeol synthase 2 (TAI…	.			2.13916			2.94292					-1.15029		-1.10131
		AT1G25400		unknown protein; FUNCTIONS IN: molecular_function unknown; INVOLVED IN: biological_process unknown; LOCATED IN: cellular_component unknown; EXPRESSED IN: 20 plant structures; EXPRESSED DURING: 10 growth stages; BEST Arabidopsis thaliana protein match is: unknown protein (TAIR:AT1G68440.1). |	.					-1.10648	1.25146			-1.34138	-1.41304	-2.36784	1.35185
		AT5G17350		unknown protein; FUNCTIONS IN: molecular_function unknown; INVOLVED IN: N-terminal protein myristoylation; LOCATED IN: cellular_component unknown; EXPRESSED IN: 15 plant structures; EXPRESSED DURING: 8 growth stages; BEST Arabidopsis thaliana protein match is: unknown protein (TAIR:AT3G03280.1); Has 1807 Blast hits to 1807 proteins in 277 species: Archae - 0; Bacteria - 0; Metazoa - 736; Fungi - …	.			-1.58002			1.5734			-3.38762	-2.66354	-3.29574			2.51728
Roots	349	AT3G12900	F6'H1	2-oxoglutarate (2OG) and Fe(II)-dependent oxygenase superfamily protein 2-oxoglutarate (2OG) and Fe(II)-dependent oxygenase superfamily protein; FUNCTIONS IN: oxidoreductase activity, acting on paired donors, with incorporation or reduction of molecular oxygen, 2-oxoglutarate as one donor, and incorporation of one atom each of oxygen into both donors, oxidoreductase activity; INVOLVED IN: biologi…	.	Yes	Yes	2.334	-6.96042	-2.38002			4.16221
		AT3G46900	COPT2	copper transporter 2 encodes a member of copper transporter family and functionally complements a high affinity copper transporter mutant in yeast copper transporter 2 (COPT2); FUNCTIONS IN: copper ion transmembrane transporter activity, high affinity copper ion transmembrane transporter activity; INVOLVED IN: copper ion transport, high-affinity copper ion transport; LOCATED IN: anchored to plasm…	.	Yes	Yes		2.0469		2.55946		2.39481
		AT1G01580	FRO2	FRO2; ferric reduction oxidase 2 Encodes the low-iron-inducible ferric chelate reductase responsible for reduction of iron at the root surface. It is likely to be the major Fe(III) chelate reductase in Arabidopsis iron metabolism. Coordinately regulated with IRT1, the major transporter responsible for high-affinity iron uptake from the soil, at both transcriptional and posttranscriptional levels.…	.	Yes	Yes	2.0427	-3.88848	-2.02069	1.56734		2.3928				1.415
		AT4G13420	HAK5	high affinity K+ transporter 5 Encodes a protein of the KUP/HAK/KT potassium channel class that is upregulated in the roots by K levels. high affinity K+ transporter 5 (HAK5); FUNCTIONS IN: potassium ion transmembrane transporter activity, potassium:sodium symporter activity; INVOLVED IN: potassium ion transport; LOCATED IN: membrane; EXPRESSED IN: 15 plant structures; EXPRESSED DURING: 8 growth …	.	Yes	Yes	1.60503		1.01211	5.12261	1.42817
		AT4G17680		SBP (S-ribonuclease binding protein) family protein SBP (S-ribonuclease binding protein) family protein; FUNCTIONS IN: zinc ion binding; INVOLVED IN: biological_process unknown; LOCATED IN: cellular_component unknown; CONTAINS InterPro DOMAIN/s: Zinc finger, RING-type (InterPro:IPR001841), S-ribonuclease binding protein, SBP1, pollen (InterPro:IPR017066); BEST Arabidopsis thaliana protein match i…	.	Yes	Yes	2.5739	-4.10408	-2.45583			3.11962
		AT5G48010	THAS1	thalianol synthase 1 Encodes an oxidosqualene cyclase involved in the biosynthesis of thalianol, a tricyclic triterpenoid of unknown function. Overexpression of THAS leads to dwarfing in the aerial tissues of Arabidopsis plants, but increases their root length. THAS is part of a small operon-like cluster of genes (with At5g48000 (THAH) and At5g47990 (THAD)) involved in thalianol metabolism. thali…	.	Yes	Yes	2.80104	2.34321				-1.48714
		AT5G38820		Transmembrane amino acid transporter family protein Encodes a putative amino acid transporter. Transmembrane amino acid transporter family protein; CONTAINS InterPro DOMAIN/s: Amino acid transporter, transmembrane (InterPro:IPR013057); BEST Arabidopsis thaliana protein match is: Transmembrane amino acid transporter family protein (TAIR:AT3G30390.2); Has 4324 Blast hits to 4257 proteins in 375 spe…	.	Yes	Yes	2.12936	-4.36447	-2.26688	1.57267		2.94734
		AT4G31940	CYP82C4	cytochrome P450, family 82, subfamily C, polypeptide 4 member of CYP82C "cytochrome P450, family 82, subfamily C, polypeptide 4" (CYP82C4); FUNCTIONS IN: electron carrier activity, monooxygenase activity, iron ion binding, oxygen binding, heme binding; INVOLVED IN: oxidation reduction; LOCATED IN: endomembrane system; EXPRESSED IN: root; CONTAINS InterPro DOMAIN/s: Cytochrome P450 (InterPro:IPR00…	.	Yes	Yes	1.38488	-6.65624	-3.0577	1.14625		4.21148
		AT4G21680	NRT1.8	NITRATE TRANSPORTER 1.8 Encodes a nitrate transporter (NRT1.8). Functions in nitrate removal from the xylem sap. Mediates cadmium tolerance. NITRATE TRANSPORTER 1.8 (NRT1.8); FUNCTIONS IN: transporter activity, nitrate transmembrane transporter activity; INVOLVED IN: response to cadmium ion, oligopeptide transport, response to nitrate; LOCATED IN: plasma membrane, membrane; EXPRESSED IN: 9 plant …	.	Yes	Yes	3.2752		-1.62265		1.29902	-2.62005
		AT1G73120		unknown protein; FUNCTIONS IN: molecular_function unknown; INVOLVED IN: response to oxidative stress; EXPRESSED IN: root, cultured cell; Has 36 Blast hits to 36 proteins in 8 species: Archae - 0; Bacteria - 0; Metazoa - 0; Fungi - 0; Plants - 36; Viruses - 0; Other Eukaryotes - 0 (source: NCBI BLink). |	.	Yes	Yes	1.89792	-1.11057	-3.39925	-1.55887	1.71682	1.56845
		AT1G52820		2-oxoglutarate (2OG) and Fe(II)-dependent oxygenase superfamily protein 2-oxoglutarate (2OG) and Fe(II)-dependent oxygenase superfamily protein; FUNCTIONS IN: oxidoreductase activity; EXPRESSED IN: root; CONTAINS InterPro DOMAIN/s: Oxoglutarate/iron-dependent oxygenase (InterPro:IPR005123); BEST Arabidopsis thaliana protein match is: 2-oxoglutarate (2OG) and Fe(II)-dependent oxygenase superfamily…	.	Yes		-1.41657					1.47343
		AT3G49620		2-oxoglutarate (2OG) and Fe(II)-dependent oxygenase superfamily protein encodes a protein similar to 2-oxoacid-dependent dioxygenase. Expression is induced after 24 hours of dark treatment, in senescing leaves and treatment with exogenous photosynthesis inhibitor. Induction of gene expression was suppressed in excised leaves supplied with sugar. The authors suggest that the gene's expression patt…	.	Yes		1.22392		-1.70267	-2.52234	1.20289	-4.29798
		AT1G77120	ADH1	alcohol dehydrogenase 1 Catalyzes the reduction of acetaldehyde using NADH as reductant. Requires zinc for activity. Dimer. Anaerobic response polypeptide (ANP). Fermentation. The protein undergoes thiolation following treatment with the oxidant tert-butylhydroperoxide. alcohol dehydrogenase 1 (ADH1); FUNCTIONS IN: alcohol dehydrogenase (NAD) activity; INVOLVED IN: response to cadmium ion, cellul…	.	Yes		1.12573		3.51496	6.06452	4.29418
		AT4G27450		Aluminium induced protein with YGL and LRDR motifs Aluminium induced protein with YGL and LRDR motifs; FUNCTIONS IN: molecular_function unknown; INVOLVED IN: biological_process unknown; LOCATED IN: cytosol, nucleus, plasma membrane; EXPRESSED IN: 25 plant structures; EXPRESSED DURING: 14 growth stages; BEST Arabidopsis thaliana protein match is: Aluminium induced protein with YGL and LRDR motifs …	.	Yes				1.34968	2.46745	1.37357
		AT1G55525		AT1G55525.1 other_rna other RNA Unknown gene |	.	Yes		2.272					-3.02718
		AT4G12470	AZI1	azelaic acid induced 1 Encodes AZI1 (AZELAIC ACID INDUCED 1). Involved in the priming of salicylic acid induction and systemic immunity triggered by pathogen or azelaic acid. azelaic acid induced 1 (AZI1); FUNCTIONS IN: lipid binding; INVOLVED IN: systemic acquired resistance, defense response to fungus, lipid transport; LOCATED IN: endomembrane system; EXPRESSED IN: 12 plant structures; EXPRESSE…	.	Yes		2.59071			7.24639	3.37017					1.33258		1.77697
		AT5G28510	BGLU24	beta glucosidase 24 beta glucosidase 24 (BGLU24); FUNCTIONS IN: cation binding, hydrolase activity, hydrolyzing O-glycosyl compounds, catalytic activity; INVOLVED IN: carbohydrate metabolic process; LOCATED IN: endomembrane system; CONTAINS InterPro DOMAIN/s: Glycoside hydrolase, family 1 (InterPro:IPR001360), Glycoside hydrolase, family 1, active site (InterPro:IPR018120), Glycoside hydrolase, c…	.	Yes		1.34842			1.73176	1.30555	-1.87201
		AT4G12480		Bifunctional inhibitor/lipid-transfer protein/seed storage 2S albumin superfamily protein a putative lipid transfer protein, vernalization-responsive and cold-induced pEARLI 1; FUNCTIONS IN: lipid binding; INVOLVED IN: defense response to fungus, lipid transport; LOCATED IN: endomembrane system; EXPRESSED IN: 6 plant structures; EXPRESSED DURING: LP.06 six leaves visible, LP.04 four leaves visibl…	.	Yes		4.34849			8.16251	4.11293
		AT2G42250	CYP712A1	cytochrome P450, family 712, subfamily A, polypeptide 1 member of CYP712A "cytochrome P450, family 712, subfamily A, polypeptide 1" (CYP712A1); FUNCTIONS IN: electron carrier activity, monooxygenase activity, iron ion binding, oxygen binding, heme binding; INVOLVED IN: oxidation reduction; LOCATED IN: endomembrane system; EXPRESSED IN: root; CONTAINS InterPro DOMAIN/s: Cytochrome P450 (InterPro:I…	.	Yes		-1.33796		1.05986			2.02731
		AT5G06905	CYP712A2	cytochrome P450, family 712, subfamily A, polypeptide 2 member of CYP712A "cytochrome P450, family 712, subfamily A, polypeptide 2" (CYP712A2); FUNCTIONS IN: electron carrier activity, monooxygenase activity, iron ion binding, oxygen binding, heme binding; INVOLVED IN: oxidation reduction; CONTAINS InterPro DOMAIN/s: Cytochrome P450 (InterPro:IPR001128), Cytochrome P450, conserved site (InterPro:…	.	Yes		-2.50351		1.69066			3.31371
		AT3G52970	CYP76G	cytochrome P450, family 76, subfamily G, polypeptide 1 member of CYP76G "cytochrome P450, family 76, subfamily G, polypeptide 1" (CYP76G1); FUNCTIONS IN: electron carrier activity, monooxygenase activity, iron ion binding, oxygen binding, heme binding; INVOLVED IN: oxidation reduction; LOCATED IN: endomembrane system; EXPRESSED IN: stem, root; CONTAINS InterPro DOMAIN/s: Cytochrome P450 (InterPro…	.	Yes		-4.69799		1.71266			4.06433
		AT5G06900	CYP93D1	cytochrome P450, family 93, subfamily D, polypeptide 1 member of CYP93D "cytochrome P450, family 93, subfamily D, polypeptide 1" (CYP93D1); FUNCTIONS IN: electron carrier activity, monooxygenase activity, iron ion binding, oxygen binding, heme binding; INVOLVED IN: oxidation reduction; LOCATED IN: endomembrane system; EXPRESSED IN: root; CONTAINS InterPro DOMAIN/s: Cytochrome P450 (InterPro:IPR00…	.	Yes		-1.54611		1.52005			2.91711
		AT1G28370	ERF11	ERF domain protein 11 encodes a member of the ERF (ethylene response factor) subfamily B-1 of ERF/AP2 transcription factor family. The protein contains one AP2 domain. There are 15 members in this subfamily including ATERF-3, ATERF-4, ATERF-7, and leafy petiole. ERF domain protein 11 (ERF11); CONTAINS InterPro DOMAIN/s: DNA-binding, integrase-type (InterPro:IPR016177), Pathogenesis-related transc…	.	Yes		-1.11168			1.4629		-1.44021	-3.27493	-1.88071	-4.47767
		AT5G19110		Eukaryotic aspartyl protease family protein Eukaryotic aspartyl protease family protein; FUNCTIONS IN: aspartic-type endopeptidase activity; INVOLVED IN: proteolysis, N-terminal protein myristoylation; LOCATED IN: endomembrane system; EXPRESSED IN: shoot apex, leaf apex, hypocotyl, root, leaf; CONTAINS InterPro DOMAIN/s: Peptidase aspartic (InterPro:IPR021109), Peptidase aspartic, catalytic (Inte…	.	Yes		1.06714			-1.38173		-1.65701
		AT5G23980	FRO4	FRO4; ferric reduction oxidase 4 Encodes a ferric chelate reductase that is expressed at low levels in roots,shoots and cotyledons, but not flowers. Its transcription is regulated by FIT1. ferric reduction oxidase 4 (FRO4); FUNCTIONS IN: ferric-chelate reductase activity; INVOLVED IN: oxidation reduction, N-terminal protein myristoylation; LOCATED IN: endomembrane system, integral to membrane, me…	.	Yes		-1.25065	3.6844		3.55065		2.64571				-1.01066
		AT2G29460	GSTU4	glutathione S-transferase tau 4 Encodes glutathione transferase belonging to the tau class of GSTs. Naming convention according to Wagner et al. (2002). glutathione S-transferase tau 4 (GSTU4); CONTAINS InterPro DOMAIN/s: Thioredoxin fold (InterPro:IPR012335), Glutathione S-transferase, C-terminal (InterPro:IPR004046), Glutathione S-transferase, C-terminal-like (InterPro:IPR010987), Glutathione S…	.	Yes				-1.67175	1.33452	1.17184	-2.8818
		AT4G19760		Glycosyl hydrolase family protein with chitinase insertion domain Glycosyl hydrolase family protein with chitinase insertion domain; FUNCTIONS IN: cation binding, chitinase activity, hydrolase activity, hydrolyzing O-glycosyl compounds, catalytic activity; INVOLVED IN: carbohydrate metabolic process; LOCATED IN: cellular_component unknown; CONTAINS InterPro DOMAIN/s: Glycoside hydrolase, family 1…	.	Yes				-1.18351	-1.35572	1.24383
		AT5G65140		Haloacid dehalogenase-like hydrolase (HAD) superfamily protein Haloacid dehalogenase-like hydrolase (HAD) superfamily protein; FUNCTIONS IN: catalytic activity, trehalose-phosphatase activity; INVOLVED IN: response to cadmium ion, trehalose biosynthetic process; EXPRESSED IN: 21 plant structures; EXPRESSED DURING: 14 growth stages; CONTAINS InterPro DOMAIN/s: HAD-superfamily hydrolase, subfamily …	.	Yes		1.55914		1.3013	2.97508
		AT2G16060	HB1	hemoglobin 1 Encodes a class 1 nonsymbiotic hemoglobin induced by low oxygen levels with very high oxygen affinity. It is not likely to be a hemoglobin transporter because of its extremely high affinity for oxygen. hemoglobin 1 (HB1); FUNCTIONS IN: oxygen binding; INVOLVED IN: response to hypoxia; LOCATED IN: cell wall, plasma membrane; EXPRESSED IN: 22 plant structures; EXPRESSED DURING: 14 grow…	.	Yes				1.84709	3.8289	1.95863					1.32705
		AT2G39980		HXXXD-type acyl-transferase family protein HXXXD-type acyl-transferase family protein; FUNCTIONS IN: transferase activity, transferring acyl groups other than amino-acyl groups, transferase activity; INVOLVED IN: response to karrikin; LOCATED IN: cellular_component unknown; EXPRESSED IN: 17 plant structures; EXPRESSED DURING: 10 growth stages; CONTAINS InterPro DOMAIN/s: Transferase (InterPro:IPR…	.	Yes		1.54353			3.92138	2.3338
		AT2G47520	HRE2	Integrase-type DNA-binding superfamily protein encodes a member of the ERF (ethylene response factor) subfamily B-2 of ERF/AP2 transcription factor family. The protein contains one AP2 domain. There are 5 members in this subfamily including RAP2.2 AND RAP2.12. HYPOXIA RESPONSIVE ERF (ETHYLENE RESPONSE FACTOR) 2 (HRE2); CONTAINS InterPro DOMAIN/s: DNA-binding, integrase-type (InterPro:IPR016177), …	.	Yes				3.40236	7.14986	4.83343					5.0005
		AT1G52690		Late embryogenesis abundant protein (LEA) family protein Late embryogenesis abundant protein (LEA) family protein; BEST Arabidopsis thaliana protein match is: Late embryogenesis abundant protein (LEA) family protein (TAIR:AT3G15670.1); Has 35333 Blast hits to 34131 proteins in 2444 species: Archae - 798; Bacteria - 22429; Metazoa - 974; Fungi - 991; Plants - 531; Viruses - 0; Other Eukaryotes - 9…	.	Yes		2.28075			2.70329						-6.92005	-3.68456	-7.42265
		AT3G16530		Legume lectin family protein Lectin like protein whose expression is induced upon treatment with chitin oligomers. Legume lectin family protein; FUNCTIONS IN: carbohydrate binding, binding; INVOLVED IN: response to chitin; LOCATED IN: apoplast, cell wall, nucleus, plant-type cell wall; EXPRESSED IN: 16 plant structures; EXPRESSED DURING: 9 growth stages; CONTAINS InterPro DOMAIN/s: Legume lectin,…	.	Yes				-1.56924		1.16738	-2.05946
		AT2G16005		MD-2-related lipid recognition domain-containing protein MD-2-related lipid recognition domain-containing protein; FUNCTIONS IN: molecular_function unknown; INVOLVED IN: biological_process unknown; LOCATED IN: endomembrane system; EXPRESSED IN: root; CONTAINS InterPro DOMAIN/s: MD-2-related lipid-recognition (InterPro:IPR003172); BEST Arabidopsis thaliana protein match is: MD-2-related lipid reco…	.	Yes		1.06573	1.32223		-1.58213	-1.73534
		AT2G34390	NIP2;1	NOD26-like intrinsic protein 2;1 aquaporin NIP2.1 NOD26-like intrinsic protein 2;1 (NIP2;1); CONTAINS InterPro DOMAIN/s: Major intrinsic protein, conserved site (InterPro:IPR022357), Aquaporin (InterPro:IPR012269), Major intrinsic protein (InterPro:IPR000425); BEST Arabidopsis thaliana protein match is: NOD26-like intrinsic protein 1;2 (TAIR:AT4G18910.1); Has 10129 Blast hits to 10099 proteins in…	.	Yes				2.58616	2.53737	2.45105
		AT2G39510		nodulin MtN21 /EamA-like transporter family protein nodulin MtN21 /EamA-like transporter family protein; FUNCTIONS IN: molecular_function unknown; INVOLVED IN: biological_process unknown; LOCATED IN: endomembrane system, membrane; EXPRESSED IN: 15 plant structures; EXPRESSED DURING: 6 growth stages; CONTAINS InterPro DOMAIN/s: Protein of unknown function DUF6, transmembrane (InterPro:IPR000620); …	.	Yes				2.14384	8.40121	5.2421					1.25399
		AT1G12805		nucleotide binding nucleotide binding; Has 35333 Blast hits to 34131 proteins in 2444 species: Archae - 798; Bacteria - 22429; Metazoa - 974; Fungi - 991; Plants - 531; Viruses - 0; Other Eukaryotes - 9610 (source: NCBI BLink). |	.	Yes		2.40411		3.47757	6.09373	2.74461
		AT1G18100		PEBP (phosphatidylethanolamine-binding protein) family protein Encodes a member of the FT and TFL1 family of phosphatidylethanolamine-binding proteins. It is expressed in seeds and up-regulated in response to ABA. Loss of function mutants show decreased rate of germination in the presence of ABA. ABA dependent regulation is mediated by both ABI3 and ABI5. ABI5 promotes MFT expression, primarily i…	.	Yes		1.56538			2.85401
		AT1G43800		Plant stearoyl-acyl-carrier-protein desaturase family protein Plant stearoyl-acyl-carrier-protein desaturase family protein; FUNCTIONS IN: acyl-[acyl-carrier-protein] desaturase activity, oxidoreductase activity, transition metal ion binding; INVOLVED IN: oxidation reduction, fatty acid metabolic process, fatty acid biosynthetic process; LOCATED IN: membrane; EXPRESSED IN: 9 plant structures; EXP…	.	Yes		1.59873		3.63653	6.17869	2.66175							1.25252
		AT2G17850		Rhodanese/Cell cycle control phosphatase superfamily protein Rhodanese/Cell cycle control phosphatase superfamily protein; FUNCTIONS IN: molecular_function unknown; INVOLVED IN: aging; LOCATED IN: endomembrane system; EXPRESSED IN: 9 plant structures; EXPRESSED DURING: 9 growth stages; CONTAINS InterPro DOMAIN/s: Rhodanese-like (InterPro:IPR001763); BEST Arabidopsis thaliana protein match is: sul…	.	Yes				5.4809	9.40243	6.35385
		AT3G43190	SUS4	sucrose synthase 4 Encodes a protein with sucrose synthase activity (SUS4). sucrose synthase 4 (SUS4); FUNCTIONS IN: UDP-glycosyltransferase activity, sucrose synthase activity, transferase activity, transferring glycosyl groups; INVOLVED IN: sucrose biosynthetic process, response to hypoxia; LOCATED IN: plasma membrane, vacuole, membrane; EXPRESSED IN: 15 plant structures; EXPRESSED DURING: 6 gr…	.	Yes				2.2427	4.24915	2.13087
		AT4G33070		Thiamine pyrophosphate dependent pyruvate decarboxylase family protein Thiamine pyrophosphate dependent pyruvate decarboxylase family protein; FUNCTIONS IN: in 6 functions; LOCATED IN: membrane; EXPRESSED IN: 11 plant structures; EXPRESSED DURING: 4 anthesis, C globular stage, F mature embryo stage, petal differentiation and expansion stage, E expanded cotyledon stage; CONTAINS InterPro DOMAIN/s:…	.	Yes				3.21504	4.693	2.51542					1.83998
		AT1G69880	TH8	thioredoxin H-type 8 thioredoxin H-type 8 (TH8); INVOLVED IN: N-terminal protein myristoylation, cell redox homeostasis; LOCATED IN: cellular_component unknown; EXPRESSED IN: 15 plant structures; EXPRESSED DURING: 6 growth stages; CONTAINS InterPro DOMAIN/s: Thioredoxin fold (InterPro:IPR012335), Thioredoxin, core (InterPro:IPR015467), Thioredoxin-like (InterPro:IPR017936), Thioredoxin domain (In…	.	Yes		2.3627			7.14801	2.38332
		AT3G02100		UDP-Glycosyltransferase superfamily protein UDP-Glycosyltransferase superfamily protein; FUNCTIONS IN: UDP-glycosyltransferase activity, transferase activity, transferring glycosyl groups; INVOLVED IN: metabolic process; LOCATED IN: cellular_component unknown; EXPRESSED IN: root; CONTAINS InterPro DOMAIN/s: UDP-glucuronosyl/UDP-glucosyltransferase (InterPro:IPR002213); BEST Arabidopsis thaliana p…	.	Yes		-3.07175		2.30716			3.03112
		AT1G63055		unknown protein; BEST Arabidopsis thaliana protein match is: unknown protein (TAIR:AT1G63057.2); Has 35333 Blast hits to 34131 proteins in 2444 species: Archae - 798; Bacteria - 22429; Metazoa - 974; Fungi - 991; Plants - 531; Viruses - 0; Other Eukaryotes - 9610 (source: NCBI BLink). |	.	Yes		2.9793					-2.97628
		AT5G10040		unknown protein; BEST Arabidopsis thaliana protein match is: unknown protein (TAIR:AT5G65207.1); Has 1807 Blast hits to 1807 proteins in 277 species: Archae - 0; Bacteria - 0; Metazoa - 736; Fungi - 347; Plants - 385; Viruses - 0; Other Eukaryotes - 339 (source: NCBI BLink). |	.	Yes				3.76941	8.72368	7.12169
		AT4G10270		Wound-responsive family protein Wound-responsive family protein; CONTAINS InterPro DOMAIN/s: Protein of unknown function wound-induced (InterPro:IPR022251); BEST Arabidopsis thaliana protein match is: Wound-responsive family protein (TAIR:AT4G10265.1); Has 183 Blast hits to 182 proteins in 16 species: Archae - 0; Bacteria - 0; Metazoa - 0; Fungi - 0; Plants - 183; Viruses - 0; Other Eukaryotes - …	.	Yes		1.88623		3.77404	4.84713	1.73239					1.14269
		AT4G33560		Wound-responsive family protein Wound-responsive family protein; CONTAINS InterPro DOMAIN/s: Protein of unknown function wound-induced (InterPro:IPR022251); BEST Arabidopsis thaliana protein match is: wound-responsive protein-related (TAIR:AT2G14070.1); Has 146 Blast hits to 145 proteins in 15 species: Archae - 0; Bacteria - 0; Metazoa - 0; Fungi - 0; Plants - 146; Viruses - 0; Other Eukaryotes -…	.	Yes		1.82693		4.67116	6.42064	2.50197
		AT3G03660	WOX11	WUSCHEL related homeobox 11 Encodes a WUSCHEL-related homeobox gene family member with 65 amino acids in its homeodomain. Proteins in this family contain a sequence of eight residues (TLPLFPMH) downstream of the homeodomain called the WUS box. WUSCHEL related homeobox 11 (WOX11); FUNCTIONS IN: DNA binding, sequence-specific DNA binding transcription factor activity; INVOLVED IN: regulation of tra…	.	Yes		1.42255			2.45688	1.7001					5.31316
		AT5G51860		K-box region and MADS-box transcription factor family protein K-box region and MADS-box transcription factor family protein ; FUNCTIONS IN: sequence-specific DNA binding transcription factor activity; INVOLVED IN: regulation of transcription, DNA-dependent; LOCATED IN: nucleus; EXPRESSED IN: embryo; EXPRESSED DURING: E expanded cotyledon stage, D bilateral stage; CONTAINS InterPro DOMAIN/s: Trans…	.	Yes		-1.72849					1.19528
		AT2G02850	ARPN	plantacyanin Encodes plantacyanin one of blue copper proteins. Involved in anther development and pollination. Expressed in the transmitting tract of the pistil. plantacyanin (ARPN); FUNCTIONS IN: electron carrier activity, copper ion binding; INVOLVED IN: pollination, anther development; LOCATED IN: middle lamella-containing extracellular matrix, apoplast; EXPRESSED IN: 21 plant structures; EXPR…	.	Yes		1.00714			2.02791
		AT2G44220	DUF239	Protein of Unknown Function (DUF239) Protein of Unknown Function (DUF239); INVOLVED IN: biological_process unknown; LOCATED IN: endomembrane system; CONTAINS InterPro DOMAIN/s: Protein of unknown function DUF239, plant (InterPro:IPR004314); BEST Arabidopsis thaliana protein match is: Protein of Unknown Function (DUF239) (TAIR:AT2G44240.1); Has 30201 Blast hits to 17322 proteins in 780 species: Ar…	.	Yes			-1.15661				1.32825
		AT4G28460		unknown protein; FUNCTIONS IN: molecular_function unknown; INVOLVED IN: biological_process unknown; LOCATED IN: endomembrane system; EXPRESSED IN: 10 plant structures; EXPRESSED DURING: LP.04 four leaves visible, 4 anthesis, petal differentiation and expansion stage; Has 8 Blast hits to 8 proteins in 3 species: Archae - 0; Bacteria - 0; Metazoa - 0; Fungi - 0; Plants - 8; Viruses - 0; Other Eukar…	.	Yes				-1.2531	2.08152
		AT4G21840	MSRB8	methionine sulfoxide reductase B8 methionine sulfoxide reductase B8 (MSRB8); FUNCTIONS IN: peptide-methionine-(S)-S-oxide reductase activity; INVOLVED IN: oxidation reduction; LOCATED IN: cytosol; EXPRESSED IN: root; CONTAINS InterPro DOMAIN/s: Methionine sulphoxide reductase B (InterPro:IPR002579), Mss4-like (InterPro:IPR011057); BEST Arabidopsis thaliana protein match is: methionine sulfoxide r…	.	Yes			1.04906		1.33579	1.00445
		AT5G36890	BGLU42	beta glucosidase 42 beta glucosidase 42 (BGLU42); FUNCTIONS IN: cation binding, beta-glucosidase activity, hydrolase activity, hydrolyzing O-glycosyl compounds, catalytic activity; INVOLVED IN: cellulose catabolic process, carbohydrate metabolic process; EXPRESSED IN: 23 plant structures; EXPRESSED DURING: 13 growth stages; CONTAINS InterPro DOMAIN/s: Glycoside hydrolase, family 1, beta-glucosida…	.	6	Yes	1.3938					1.55042
		AT4G12360		Bifunctional inhibitor/lipid-transfer protein/seed storage 2S albumin superfamily protein Bifunctional inhibitor/lipid-transfer protein/seed storage 2S albumin superfamily protein; CONTAINS InterPro DOMAIN/s: Bifunctional inhibitor/plant lipid transfer protein/seed storage (InterPro:IPR016140), Plant lipid transfer protein/seed storage/trypsin-alpha amylase inhibitor (InterPro:IPR003612); BEST Ar…	.		Yes	1.92588					-1.18861
		AT3G58060		Cation efflux family protein Cation efflux family protein; FUNCTIONS IN: cation transmembrane transporter activity, efflux transmembrane transporter activity; INVOLVED IN: cation transport, transmembrane transport; LOCATED IN: membrane; EXPRESSED IN: 6 plant structures; EXPRESSED DURING: 4 anthesis, petal differentiation and expansion stage; CONTAINS InterPro DOMAIN/s: Cation efflux protein (Inte…	.		Yes	3.05081			2.95147		2.55099
		AT3G53280	CYP71B5	cytochrome p450 71b5 cytochrome P450 monooxygenase cytochrome p450 71b5 (CYP71B5); FUNCTIONS IN: electron carrier activity, monooxygenase activity, iron ion binding, oxygen binding, heme binding; INVOLVED IN: oxidation reduction; EXPRESSED IN: 13 plant structures; EXPRESSED DURING: 8 growth stages; CONTAINS InterPro DOMAIN/s: Cytochrome P450 (InterPro:IPR001128), Cytochrome P450, E-class, group I…	.		Yes	3.81609					3.60943
		AT2G20520	FLA6	FASCICLIN-like arabinogalactan 6 fasciclin-like arabinogalactan-protein 6 (Fla6) FASCICLIN-like arabinogalactan 6 (FLA6); CONTAINS InterPro DOMAIN/s: FAS1 domain (InterPro:IPR000782); BEST Arabidopsis thaliana protein match is: FASCICLIN-like arabinoogalactan 9 (TAIR:AT1G03870.1); Has 1085 Blast hits to 1063 proteins in 208 species: Archae - 14; Bacteria - 391; Metazoa - 4; Fungi - 7; Plants - 61…	.		Yes	1.59457				1.77463
		AT3G07720		Galactose oxidase/kelch repeat superfamily protein Galactose oxidase/kelch repeat superfamily protein; CONTAINS InterPro DOMAIN/s: Galactose oxidase/kelch, beta-propeller (InterPro:IPR011043), Kelch repeat type 1 (InterPro:IPR006652), Kelch-type beta propeller (InterPro:IPR015915); BEST Arabidopsis thaliana protein match is: nitrile specifier protein 5 (TAIR:AT5G48180.1); Has 10920 Blast hits to …	.		Yes	2.05995	-1.25611	-1.48432			2.06951
		AT1G09560	GLP5	germin-like protein 5 germin-like protein (GLP5) germin-like protein 5 (GLP5); FUNCTIONS IN: manganese ion binding, nutrient reservoir activity; INVOLVED IN: response to cold; LOCATED IN: cell wall, nucleus; EXPRESSED IN: 22 plant structures; EXPRESSED DURING: 14 growth stages; CONTAINS InterPro DOMAIN/s: Cupin, RmlC-type (InterPro:IPR011051), Cupin 1 (InterPro:IPR006045), Germin (InterPro:IPR001…	.		Yes	1.52332		-1.03787			1.09367
		AT1G14185		Glucose-methanol-choline (GMC) oxidoreductase family protein Glucose-methanol-choline (GMC) oxidoreductase family protein; FUNCTIONS IN: aldehyde-lyase activity, oxidoreductase activity, acting on CH-OH group of donors, FAD binding; INVOLVED IN: alcohol metabolic process; LOCATED IN: endomembrane system; CONTAINS InterPro DOMAIN/s: Glucose-methanol-choline oxidoreductase, N-terminal (InterPro:IPR…	.		Yes		-1.00993				1.41016
		AT4G19680	URT2	iron regulated transporter 2 encodes an iron transporter whose expression is induced by iron and zinc deficiency. Gene is specifically expressed in the external cell layers of the root subapical zone. iron regulated transporter 2 (IRT2); FUNCTIONS IN: zinc ion transmembrane transporter activity, iron ion transmembrane transporter activity; INVOLVED IN: zinc ion transport, cellular response to iro…	.	8	Yes	4.15331			3.23746		1.8641
		AT4G34950		Major facilitator superfamily protein Major facilitator superfamily protein; CONTAINS InterPro DOMAIN/s: Nodulin-like (InterPro:IPR010658), Major facilitator superfamily, general substrate transporter (InterPro:IPR016196); BEST Arabidopsis thaliana protein match is: Major facilitator superfamily protein (TAIR:AT2G16660.1); Has 3379 Blast hits to 3250 proteins in 882 species: Archae - 26; Bacteria…	.		Yes	1.40545			2.25927
		AT1G52120		Mannose-binding lectin superfamily protein Mannose-binding lectin superfamily protein; CONTAINS InterPro DOMAIN/s: Mannose-binding lectin (InterPro:IPR001229); BEST Arabidopsis thaliana protein match is: Mannose-binding lectin superfamily protein (TAIR:AT1G52130.1); Has 1455 Blast hits to 704 proteins in 37 species: Archae - 0; Bacteria - 4; Metazoa - 0; Fungi - 0; Plants - 1447; Viruses - 0; Oth…	.		Yes	4.75063	1.58046		3.01472	1.74358
		AT3G58810	MTPA2	metal tolerance protein A2 Member of Zinc transporter (ZAT) family. Contributes to basic cellular Zn tolerance and controls Zn partitioning, particularly under conditions of high rates of Zn influx into the root symplasm. Localizes to the vacuolar membrane. metal tolerance protein A2 (MTPA2); CONTAINS InterPro DOMAIN/s: Cation efflux protein (InterPro:IPR002524); BEST Arabidopsis thaliana protein…	.		Yes	1.71222	-1.46113	-1.60279	1.29459		1.58251
		AT5G62420		NAD(P)-linked oxidoreductase superfamily protein NAD(P)-linked oxidoreductase superfamily protein; FUNCTIONS IN: oxidoreductase activity; INVOLVED IN: oxidation reduction; EXPRESSED IN: root; CONTAINS InterPro DOMAIN/s: Aldo/keto reductase (InterPro:IPR001395), Aldo/keto reductase subgroup (InterPro:IPR020471), Aldo/keto reductase, conserved site (InterPro:IPR018170); BEST Arabidopsis thaliana pr…	.		Yes	2.90104			1.90525
		AT1G34510		Peroxidase superfamily protein Peroxidase superfamily protein; FUNCTIONS IN: peroxidase activity, heme binding; INVOLVED IN: oxidation reduction, response to oxidative stress; LOCATED IN: endomembrane system; EXPRESSED IN: root; CONTAINS InterPro DOMAIN/s: Haem peroxidase (InterPro:IPR010255), Plant peroxidase (InterPro:IPR000823), Peroxidase, active site (InterPro:IPR019794), Haem peroxidase, pl…	.		Yes	2.14161		1.10823		1.19396
		AT1G54970	PRP1	proline-rich protein 1 encodes a proline-rich protein that is specifically expressed in the root. proline-rich protein 1 (PRP1); CONTAINS InterPro DOMAIN/s: Pollen Ole e 1 allergen/extensin (InterPro:IPR006041); BEST Arabidopsis thaliana protein match is: proline-rich protein 3 (TAIR:AT3G62680.1); Has 45300 Blast hits to 21383 proteins in 1373 species: Archae - 227; Bacteria - 7064; Metazoa - 171…	.		Yes	3.20188			2.05177	3.22548
		AT1G05530	UGT75B2	UDP-glucosyl transferase 75B2 Encodes a protein with glucosyltransferase activity with high sequence homology to UGT1 (AT1G05560). It belongs to an UGT subfamily that binds UDP-glucose but not UDP-glucuronate, UDP-galactose, or UDP-rhamnose as the glycosyl donor. UGT2 was shown to be able to use abscisic acid as glycosylation substrate in the presence of UDP-glucose. UDP-glucosyl transferase 75B2…	.		Yes	1.20948					1.09936
		AT5G55620		unknown protein; BEST Arabidopsis thaliana protein match is: unknown protein (TAIR:AT3G09950.1); Has 30201 Blast hits to 17322 proteins in 780 species: Archae - 12; Bacteria - 1396; Metazoa - 17338; Fungi - 3422; Plants - 5037; Viruses - 0; Other Eukaryotes - 2996 (source: NCBI BLink). |	.		Yes	2.31708					2.63328
		AT1G65484		unknown protein; FUNCTIONS IN: molecular_function unknown; INVOLVED IN: biological_process unknown; LOCATED IN: endomembrane system. |	.		Yes	-1.67489					1.1064
		AT3G61930		unknown protein; FUNCTIONS IN: molecular_function unknown; INVOLVED IN: N-terminal protein myristoylation; EXPRESSED IN: 11 plant structures; EXPRESSED DURING: 4 anthesis, C globular stage, petal differentiation and expansion stage; Has 11 Blast hits to 11 proteins in 5 species: Archae - 0; Bacteria - 0; Metazoa - 0; Fungi - 0; Plants - 11; Viruses - 0; Other Eukaryotes - 0 (source: NCBI BLink). |	.		Yes	1.99963	-1.78101	-1.04302			2.09326
		AT3G25190		Vacuolar iron transporter (VIT) family protein Vacuolar iron transporter (VIT) family protein; CONTAINS InterPro DOMAIN/s: Protein of unknown function DUF125, transmembrane (InterPro:IPR008217); BEST Arabidopsis thaliana protein match is: Vacuolar iron transporter (VIT) family protein (TAIR:AT3G43660.1); Has 1809 Blast hits to 1804 proteins in 621 species: Archae - 86; Bacteria - 1207; Metazoa - …	.		Yes			-1.20709	-2.16292
		AT5G57530	XTH12	xyloglucan endotransglucosylase/hydrolase 12 xyloglucan endotransglucosylase/hydrolase 12 (XTH12); CONTAINS InterPro DOMAIN/s: Xyloglucan endotransglucosylase/hydrolase (InterPro:IPR016455), Xyloglucan endo-transglycosylase, C-terminal (InterPro:IPR010713), Concanavalin A-like lectin/glucanase, subgroup (InterPro:IPR013320), Concanavalin A-like lectin/glucanase (InterPro:IPR008985), Glycoside hyd…	.		Yes	1.2905				1.0088
		AT5G57540	XTH13	xyloglucan endotransglucosylase/hydrolase 13 Encodes a xyloglucan endotransglucosylase/hydrolase with only only the endotransglucosylase (XET; EC 2.4.1.207) activity towards xyloglucan and non-detectable endohydrolytic (XEH; EC 3.2.1.151) activity. xyloglucan endotransglucosylase/hydrolase 13 (XTH13); FUNCTIONS IN: hydrolase activity, acting on glycosyl bonds, xyloglucan endotransglucosylase acti…	.		Yes	3.54585			2.09412	2.58379
		AT2G32270	ZIP3	zinc transporter 3 precursor A member of Zrt- and Irt-related protein (ZIP) family. transcript is induced in response to zinc deficiency in the root. also response to iron deficiency. zinc transporter 3 precursor (ZIP3); FUNCTIONS IN: zinc ion transmembrane transporter activity; INVOLVED IN: zinc ion transport; LOCATED IN: endomembrane system, integral to membrane, membrane; EXPRESSED IN: root; C…	.	9	Yes	-1.2061			-1.08713
		AT5G45105	ZIP8	zinc transporter 8 precursor zinc transporter 8 precursor (ZIP8); FUNCTIONS IN: cation transmembrane transporter activity; INVOLVED IN: cation transport; LOCATED IN: endomembrane system, integral to membrane, membrane; CONTAINS InterPro DOMAIN/s: Zinc/iron permease, fungal/plant (InterPro:IPR004698), Zinc/iron permease (InterPro:IPR003689); BEST Arabidopsis thaliana protein match is: iron-regulat…	.	4	Yes	2.71546	-3.69378	-3.97247		1.39805	2.99426
		AT5G02780	GSTL1	glutathione transferase lambda 1 Encodes a member of the lambda family of glutathione transferases. It has thiol transferase activity and self S-glutathionylation activity in vitro. glutathione transferase lambda 1 (GSTL1); FUNCTIONS IN: molecular_function unknown; INVOLVED IN: protein amino acid glutathionylation; LOCATED IN: cellular_component unknown; EXPRESSED IN: stem, male gametophyte, root…	.	5	Yes	2.30001	-1.43307	-1.54709	1.44532		2.73671
		AT3G60330	AHA7	H(+)-ATPase 7 H(+)-ATPase 7 (HA7); FUNCTIONS IN: hydrogen-exporting ATPase activity, phosphorylative mechanism; INVOLVED IN: cation transport, metabolic process, ATP biosynthetic process; EXPRESSED IN: 7 plant structures; EXPRESSED DURING: L mature pollen stage, M germinated pollen stage, 4 anthesis, petal differentiation and expansion stage; CONTAINS InterPro DOMAIN/s: ATPase, P-type, ATPase-ass…	.	7	Yes	1.30344			1.30656
		AT3G12820	MYB10	myb domain protein 10 Member of the R2R3 factor gene family. myb domain protein 10 (MYB10); FUNCTIONS IN: DNA binding, sequence-specific DNA binding transcription factor activity; INVOLVED IN: N-terminal protein myristoylation, regulation of transcription, DNA-dependent; EXPRESSED IN: shoot apex, hypocotyl, sepal, root, flower; EXPRESSED DURING: petal differentiation and expansion stage; CONTAINS…	.	7	Yes	2.0626	-1.33252		1.4802		1.82361
		AT1G56160	MYB72	myb domain protein 72 Encodes a member of the R2R3 transcription factor gene family that is involved in mediating induced systemic resistance. Genetic analysis of loss of function mutants and overexpressor lines indicates MYB72 is necessary but not sufficient for ISR.Interacts in vivo with EIL3. myb domain protein 72 (MYB72); CONTAINS InterPro DOMAIN/s: SANT, DNA-binding (InterPro:IPR001005), Hom…	.	10	Yes	3.07315			3.35386		3.53977
		AT2G30670		NAD(P)-binding Rossmann-fold superfamily protein NAD(P)-binding Rossmann-fold superfamily protein; FUNCTIONS IN: oxidoreductase activity, binding, catalytic activity; INVOLVED IN: oxidation reduction, metabolic process; LOCATED IN: cellular_component unknown; EXPRESSED IN: 18 plant structures; EXPRESSED DURING: 12 growth stages; CONTAINS InterPro DOMAIN/s: NAD(P)-binding domain (InterPro:IPR01604…	.		Yes			-2.407	3.14264	1.25434	-1.56107
		AT1G01480	ACS2	1-amino-cyclopropane-1-carboxylate synthase 2 a member of the 1-aminocyclopropane-1-carboxylate (ACC) synthase (S-adenosyl-L-methionine methylthioadenosine-lyase, EC 4.4.1.14) gene family, isolated from a flower-specific cDNA library. 1-amino-cyclopropane-1-carboxylate synthase 2 (ACS2); CONTAINS InterPro DOMAIN/s: 1-aminocyclopropane-1-carboxylate synthase (InterPro:IPR001176), Pyridoxal phospha…	.			1.38115			1.42337
		AT5G59540		2-oxoglutarate (2OG) and Fe(II)-dependent oxygenase superfamily protein 2-oxoglutarate (2OG) and Fe(II)-dependent oxygenase superfamily protein; FUNCTIONS IN: oxidoreductase activity; INVOLVED IN: biological_process unknown; LOCATED IN: cellular_component unknown; EXPRESSED IN: 17 plant structures; EXPRESSED DURING: 9 growth stages; CONTAINS InterPro DOMAIN/s: Oxoglutarate/iron-dependent oxygenas…	.					-1.42227		1.28047	-1.43126
		AT1G15540		2-oxoglutarate (2OG) and Fe(II)-dependent oxygenase superfamily protein 2-oxoglutarate (2OG) and Fe(II)-dependent oxygenase superfamily protein; FUNCTIONS IN: oxidoreductase activity; INVOLVED IN: N-terminal protein myristoylation; CONTAINS InterPro DOMAIN/s: Oxoglutarate/iron-dependent oxygenase (InterPro:IPR005123); BEST Arabidopsis thaliana protein match is: 2-oxoglutarate (2OG) and Fe(II)-dep…	.			-2.1746		1.27829			1.80811
		AT1G52790		2-oxoglutarate (2OG) and Fe(II)-dependent oxygenase superfamily protein encodes a putative oxidoreductase, 2OG-Fe(II) oxygenase family protein, similar to GS-AOP loci (GI:16118889, GI:16118887, GI:16118891, GI:16118893); contains PF03171 2OG-Fe(II) oxygenase superfamily domain 2-oxoglutarate (2OG) and Fe(II)-dependent oxygenase superfamily protein; FUNCTIONS IN: oxidoreductase activity; LOCATED I…	.			-1.31256		1.17817			1.57084
		AT4G34250	KCS16	3-ketoacyl-CoA synthase 16 Encodes KCS16, a member of the 3-ketoacyl-CoA synthase family involved in the biosynthesis of VLCFA (very long chain fatty acids). 3-ketoacyl-CoA synthase 16 (KCS16); FUNCTIONS IN: transferase activity, transferring acyl groups other than amino-acyl groups, catalytic activity, acyltransferase activity; INVOLVED IN: fatty acid elongation, response to light stimulus, very…	.			1.7415			1.57818
		AT5G52860		ABC-2 type transporter family protein ABC-2 type transporter family protein; FUNCTIONS IN: ATPase activity, coupled to transmembrane movement of substances; LOCATED IN: membrane; EXPRESSED IN: 9 plant structures; EXPRESSED DURING: 6 growth stages; CONTAINS InterPro DOMAIN/s: ATPase, AAA+ type, core (InterPro:IPR003593), ABC transporter-like (InterPro:IPR003439), ABC-2 type transporter (InterPro:I…	.					1.59603	3.80761
		AT2G19590	ACO1	ACC oxidase 1 encodes a protein whose sequence is similar to 1-aminocyclopropane-1-carboxylate oxidase ACC oxidase 1 (ACO1); CONTAINS InterPro DOMAIN/s: Oxoglutarate/iron-dependent oxygenase (InterPro:IPR005123); BEST Arabidopsis thaliana protein match is: 2-oxoglutarate (2OG) and Fe(II)-dependent oxygenase superfamily protein (TAIR:AT1G12010.1); Has 7815 Blast hits to 7777 proteins in 927 specie…	.					1.73141	2.89904
		AT2G26400	ARD3	acireductone dioxygenase 3 Encodes a protein predicted to belong to the acireductone dioxygenase (ARD/ARD)family. acireductone dioxygenase 3 (ARD3); FUNCTIONS IN: heteroglycan binding, acireductone dioxygenase [iron(II)-requiring] activity, metal ion binding; INVOLVED IN: oxidation reduction, L-methionine salvage from methylthioadenosine; LOCATED IN: cellular_component unknown; EXPRESSED IN: 22 p…	.			-2.11177	1.08632	-2.22934	2.00001	1.16368	-2.83254				2.89474
		AT3G01990	ACR6	ACT domain repeat 6 Member of a small family of ACT domain containing proteins in Arabidopsis. ACT domains are involved in amino acid binding. ACT domain repeat 6 (ACR6); FUNCTIONS IN: amino acid binding; INVOLVED IN: metabolic process; LOCATED IN: cellular_component unknown; EXPRESSED IN: stem, carpel, stamen; EXPRESSED DURING: 4 anthesis, petal differentiation and expansion stage; CONTAINS Inte…	.			1.46476			1.53849						-1.46655
		AT3G03270		Adenine nucleotide alpha hydrolases-like superfamily protein Adenine nucleotide alpha hydrolases-like superfamily protein; INVOLVED IN: response to stress; LOCATED IN: plasma membrane, membrane; EXPRESSED IN: 23 plant structures; EXPRESSED DURING: 13 growth stages; CONTAINS InterPro DOMAIN/s: UspA (InterPro:IPR006016), Rossmann-like alpha/beta/alpha sandwich fold (InterPro:IPR014729), Universal s…	.					1.39731	2.91031	1.33822
		AT2G14210	AGL44	AGAMOUS-like 44 MADS box gene, transcription factor AGAMOUS-like 44 (AGL44); FUNCTIONS IN: DNA binding, sequence-specific DNA binding transcription factor activity; INVOLVED IN: response to nutrient, lateral root development; LOCATED IN: nucleus; EXPRESSED IN: 7 plant structures; EXPRESSED DURING: F mature embryo stage, petal differentiation and expansion stage, E expanded cotyledon stage, D bila…	.					1.18279	2.05524
		AT4G36250	ALDH3F1	aldehyde dehydrogenase 3F1 Encodes a putative aldehyde dehydrogenase. The gene is not responsive to osmotic stress and is expressed constitutively at a low level in plantlets and root cultures. aldehyde dehydrogenase 3F1 (ALDH3F1); FUNCTIONS IN: 3-chloroallyl aldehyde dehydrogenase activity, aldehyde dehydrogenase (NAD) activity; INVOLVED IN: cellular aldehyde metabolic process, oxidation reducti…	.			1.19348			1.34304
		AT5G16970		alkenal reductase encodes a 2-alkenal reductase (EC 1.3.1.74), plays a key role in the detoxification of reactive carbonyls alkenal reductase (AER); FUNCTIONS IN: 2-alkenal reductase activity; INVOLVED IN: response to oxidative stress, response to cadmium ion, response to cyclopentenone; LOCATED IN: cytosol, nucleus; EXPRESSED IN: 17 plant structures; EXPRESSED DURING: 11 growth stages; CONTAINS …	.			3.53134			4.28088
		AT1G08080	ACA7	alpha carbonic anhydrase 7 alpha carbonic anhydrase 7 (ACA7); FUNCTIONS IN: carbonate dehydratase activity, zinc ion binding; INVOLVED IN: one-carbon metabolic process; LOCATED IN: endomembrane system; CONTAINS InterPro DOMAIN/s: Carbonic anhydrase, alpha-class, catalytic domain (InterPro:IPR001148), Carbonic anhydrase, CAH1-like (InterPro:IPR018340), Carbonic anhydrase, alpha-class, conserved si…	.				-2.2504		3.21439
		AT1G64670	BDG1	alpha/beta-Hydrolases superfamily protein Encodes a epidermally expressed extracellular protein that likely functions as an alpha-beta hydrolase and is required for normal cuticle formation. Homozygous mutant plants are dwarfed and have abnormal leaves, collapsed cells, reduced numbers of trichomes. The specific role of BDG is unclear: it may function in cutin biosynthesis or as a cross-linking e…	.			1.59182			2.52457
		AT1G77380	AAP3	amino acid permease 3 Amino acid permease which transports basic amino acids. amino acid permease 3 (AAP3); CONTAINS InterPro DOMAIN/s: Amino acid transporter, transmembrane (InterPro:IPR013057); BEST Arabidopsis thaliana protein match is: amino acid permease 2 (TAIR:AT5G09220.1); Has 2346 Blast hits to 2332 proteins in 227 species: Archae - 0; Bacteria - 15; Metazoa - 394; Fungi - 322; Plants - …	.			1.03254			1.21447
		AT2G33790	AGP30	arabinogalactan protein 30 pollen Ole e 1 allergen protein containing 14.6% proline residues, similar to arabinogalactan protein (Daucus carota) GI:11322245, SP:Q03211 Pistil-specific extensin-like protein precursor (PELP) {Nicotiana tabacum}; contains Pfam profile PF01190: Pollen proteins Ole e I family arabinogalactan protein 30 (AGP30); FUNCTIONS IN: molecular_function unknown; INVOLVED IN: bi…	.			1.08979			-1.2431
		AT1G33813.1		AT1G33813.1 transposable_element_gene transposable element gene copia-like retrotransposon family, has a 5.8e-39 P-value blast match to gb|AAO73529.1| gag-pol polyprotein (Glycine max) (SIRE1) (Ty1_Copia-family) |	.			-1.84871	-1.21545	-1.01216	-1.38283
		AT1G33817.1		AT1G33817.1 transposable_element_gene transposable element gene copia-like retrotransposon family, has a 8.1e-100 P-value blast match to gb|AAO73521.1| gag-pol polyprotein (Glycine max) (SIRE1) (Ty1_Copia-family) |	.			-1.7367			-1.43402
		AT2G15840		AT2G15840.1 pseudogene pseudogene, hypothetical protein |	.			1.99242					2.37134
		AT3G14185		AT3G14185.1 other_rna other RNA Unknown gene |	.			-1.61129		-1.39308	-1.40629
		AT3G17050.1		AT3G17050.1 transposable_element_gene transposable element gene pseudogene, glycine-rich protein, similar to glycine-rich protein TIGR:At1g53620.1 (Arabidopsis thaliana) |	.			1.24992			2.41707
		AT3G57157		AT3G57157.1 other_rna other RNA |	.			1.94466			2.13255
		AT5G07215.1		AT5G07215.1 transposable_element_gene transposable element gene non-LTR retrotransposon family (LINE), has a 6.9e-34 P-value blast match to GB:NP_038605 L1 repeat, Tf subfamily, member 30 (LINE-element) (Mus musculus) |	.			-1.33722					-1.0439
		AT5G28145.1		AT5G28145.1 transposable_element_gene transposable element gene copia-like retrotransposon family, has a 4.1e-195 P-value blast match to GB:AAA57005 Hopscotch polyprotein (Ty1_Copia-element) (Zea mays) |	.			-1.26026			-1.27007
		AT3G22910		ATPase E1-E2 type family protein / haloacid dehalogenase-like hydrolase family protein ATPase E1-E2 type family protein / haloacid dehalogenase-like hydrolase family protein; FUNCTIONS IN: calcium-transporting ATPase activity, calmodulin binding; INVOLVED IN: cation transport, calcium ion transport, metabolic process, ATP biosynthetic process; LOCATED IN: membrane; EXPRESSED IN: 12 plant structur…	.					-1.77661	1.5699					-1.16169
		AT2G30660		ATP-dependent caseinolytic (Clp) protease/crotonase family protein ATP-dependent caseinolytic (Clp) protease/crotonase family protein; FUNCTIONS IN: catalytic activity; INVOLVED IN: metabolic process; EXPRESSED IN: 7 plant structures; EXPRESSED DURING: F mature embryo stage, petal differentiation and expansion stage, LP.12 twelve leaves visible; CONTAINS InterPro DOMAIN/s: Crotonase, core (InterP…	.			1.34963	1.49219	-1.84664	3.32681	1.66979	-1.43908
		AT2G34315		Avirulence induced gene (AIG1) family protein Avirulence induced gene (AIG1) family protein; FUNCTIONS IN: GTP binding; INVOLVED IN: biological_process unknown; LOCATED IN: cellular_component unknown; EXPRESSED IN: embryo, root, stamen; EXPRESSED DURING: 4 anthesis, D bilateral stage; CONTAINS InterPro DOMAIN/s: AIG1 (InterPro:IPR006703); BEST Arabidopsis thaliana protein match is: Avirulence ind…	.			-1.52287		-2.30045	-1.57616
		AT1G19960		BEST Arabidopsis thaliana protein match is: transmembrane receptors (TAIR:AT2G32140.1); Has 41 Blast hits to 41 proteins in 17 species: Archae - 0; Bacteria - 2; Metazoa - 23; Fungi - 0; Plants - 11; Viruses - 0; Other Eukaryotes - 5 (source: NCBI BLink). |	.			-2.07068		-1.73485			-1.05873				1.89149		1.87697
		AT1G23730	BCA3	beta carbonic anhydrase 3 beta carbonic anhydrase 3 (BCA3); FUNCTIONS IN: carbonate dehydratase activity, zinc ion binding; INVOLVED IN: carbon utilization; LOCATED IN: cytosol, plasma membrane, membrane; EXPRESSED IN: 14 plant structures; EXPRESSED DURING: 6 growth stages; CONTAINS InterPro DOMAIN/s: Carbonic anhydrase, prokaryotic-like, conserved site (InterPro:IPR015892), Carbonic anhydrase (I…	.			1.96592			3.52668
		AT3G43720		Bifunctional inhibitor/lipid-transfer protein/seed storage 2S albumin superfamily protein Bifunctional inhibitor/lipid-transfer protein/seed storage 2S albumin superfamily protein; CONTAINS InterPro DOMAIN/s: Bifunctional inhibitor/plant lipid transfer protein/seed storage (InterPro:IPR016140), Plant lipid transfer protein/seed storage/trypsin-alpha amylase inhibitor (InterPro:IPR003612); BEST Ar…	.			1.61018			2.05159
		AT5G13900		Bifunctional inhibitor/lipid-transfer protein/seed storage 2S albumin superfamily protein Bifunctional inhibitor/lipid-transfer protein/seed storage 2S albumin superfamily protein; CONTAINS InterPro DOMAIN/s: Bifunctional inhibitor/plant lipid transfer protein/seed storage (InterPro:IPR016140), Plant lipid transfer protein/seed storage/trypsin-alpha amylase inhibitor (InterPro:IPR003612); BEST Ar…	.					-1.25248	1.40783		1.17721
		AT1G55260		Bifunctional inhibitor/lipid-transfer protein/seed storage 2S albumin superfamily protein Bifunctional inhibitor/lipid-transfer protein/seed storage 2S albumin superfamily protein; FUNCTIONS IN: lipid binding; INVOLVED IN: lipid transport; LOCATED IN: anchored to membrane; EXPRESSED IN: 22 plant structures; EXPRESSED DURING: 13 growth stages; CONTAINS InterPro DOMAIN/s: Bifunctional inhibitor/pla…	.			1.22264			2.24696
		AT5G01870		Bifunctional inhibitor/lipid-transfer protein/seed storage 2S albumin superfamily protein Predicted to encode a PR (pathogenesis-related) protein. Belongs to the lipid transfer protein (PR-14) family with the following members: At2g38540/LTP1, At2g38530/LTP2, At5g59320/LTP3, At5g59310/LTP4, At3g51600/LTP5, At3g08770/LTP6, At2g15050/LTP7, At2g18370/LTP8, At2g15325/LTP9, At5g01870/LTP10, At4g33355/…	.			1.43681			2.24383
		AT1G11190	BFN1	bifunctional nuclease i Encodes a bifunctional nuclease that acts on both RNA and DNA involved in nucleic acid degradation to facilitate nucleotide and phosphate recovery during senescence. It has mismatch-specific endonuclease activity with wide recognition of single base mismatches as well as the ability to cleave indel types of mismatches (heteroduplexes with loops). bifunctional nuclease i (B…	.			1.07361			1.2634
		AT5G20230	BCB	blue-copper-binding protein Al-stress-induced gene blue-copper-binding protein (BCB); FUNCTIONS IN: electron carrier activity, copper ion binding; INVOLVED IN: response to oxidative stress, response to salt stress, aluminum ion transport, response to wounding, response to absence of light; LOCATED IN: anchored to plasma membrane, plasma membrane, vacuole, anchored to membrane; EXPRESSED IN: 24 pl…	.			2.10749			1.30459		-1.12053		-1.73097
		AT2G45760	BAP2	BON association protein 2 encodes a protein that is similar to BONZAI1-binding protein BAP1. BON association protein 2 (BAP2); CONTAINS InterPro DOMAIN/s: C2 calcium/lipid-binding domain, CaLB (InterPro:IPR008973), C2 calcium-dependent membrane targeting (InterPro:IPR000008); BEST Arabidopsis thaliana protein match is: BON association protein 1 (TAIR:AT3G61190.2); Has 35333 Blast hits to 34131 pr…	.					-1.52419	1.94305
		AT3G01830		Calcium-binding EF-hand family protein Calcium-binding EF-hand family protein; FUNCTIONS IN: calcium ion binding; INVOLVED IN: biological_process unknown; LOCATED IN: cellular_component unknown; EXPRESSED IN: 18 plant structures; EXPRESSED DURING: 9 growth stages; CONTAINS InterPro DOMAIN/s: EF-hand-like domain (InterPro:IPR011992); BEST Arabidopsis thaliana protein match is: calmodulin like 37 (…	.					-2.02848	2.13418			-1.25061	-1.57563	-3.98626
		AT3G47480		Calcium-binding EF-hand family protein Calcium-binding EF-hand family protein; FUNCTIONS IN: calcium ion binding; INVOLVED IN: biological_process unknown; LOCATED IN: endomembrane system; EXPRESSED IN: 10 plant structures; EXPRESSED DURING: 9 growth stages; CONTAINS InterPro DOMAIN/s: EF-Hand 1, calcium-binding site (InterPro:IPR018247), EF-HAND 2 (InterPro:IPR018249), EF-hand-like domain (InterP…	.					-1.35038	2.45469
		AT5G42380	CML37	calmodulin like 37 calmodulin like 37 (CML37); FUNCTIONS IN: calcium ion binding; INVOLVED IN: response to ozone; LOCATED IN: chloroplast; EXPRESSED IN: 12 plant structures; EXPRESSED DURING: 8 growth stages; CONTAINS InterPro DOMAIN/s: EF-Hand 1, calcium-binding site (InterPro:IPR018247), EF-HAND 2 (InterPro:IPR018249), EF-hand-like domain (InterPro:IPR011992), Calcium-binding EF-hand (InterPro:…	.			-1.8425		-1.42578	1.99498			-1.47993	-2.0683	-3.02773
		AT5G26920		Cam-binding protein 60-like G Encodes a calmodulin-binding protein CBP60g (calmodulin binding protein 60-like.g). The calmodulin-binding domain is located near the N-terminus; calmodulin binding is dependent on Ca(2+). Inducible by both bacterial pathogen and MAMP (microbe-associated molecular pattern) treatments. Bacterial growth is enhanced in cbp60g mutants. cbp60g mutants also show defects in…	.			-1.00193		-1.36856	1.34514
		AT5G26130		CAP (Cysteine-rich secretory proteins, Antigen 5, and Pathogenesis-related 1 protein) superfamily protein CAP (Cysteine-rich secretory proteins, Antigen 5, and Pathogenesis-related 1 protein) superfamily protein; FUNCTIONS IN: molecular_function unknown; INVOLVED IN: biological_process unknown; LOCATED IN: endomembrane system, extracellular region; EXPRESSED IN: root, leaf; EXPRESSED DURING: LP.0…	.					-1.31884	-1.46637		-1.07639
		AT4G33720		CAP (Cysteine-rich secretory proteins, Antigen 5, and Pathogenesis-related 1 protein) superfamily protein CAP (Cysteine-rich secretory proteins, Antigen 5, and Pathogenesis-related 1 protein) superfamily protein; FUNCTIONS IN: molecular_function unknown; INVOLVED IN: biological_process unknown; LOCATED IN: endomembrane system, extracellular region; EXPRESSED IN: root; CONTAINS InterPro DOMAIN/s: …	.			2.3561			1.75071
		AT4G33710		CAP (Cysteine-rich secretory proteins, Antigen 5, and Pathogenesis-related 1 protein) superfamily protein CAP (Cysteine-rich secretory proteins, Antigen 5, and Pathogenesis-related 1 protein) superfamily protein; FUNCTIONS IN: molecular_function unknown; INVOLVED IN: biological_process unknown; LOCATED IN: endomembrane system, extracellular region; CONTAINS InterPro DOMAIN/s: Allergen V5/Tpx-1 re…	.			1.94679			3.90193
		AT4G32810	CCD8	carotenoid cleavage dioxygenase 8 Encodes a protein with similarity to carotenoid cleaving deoxygenases, the enzymes that cleave beta-carotene. Involved in the production of a graft transmissable signal to suppress axillary branching. Protein is localized to chloroplast stroma and expressed primarily in root tip. Mutants in the gene exhibit increased shoot branching, and light-dependent defects i…	.			1.48262			2.10415						1.89876
		AT4G23700	CHX17	cation/H+ exchanger 17 member of Putative Na+/H+ antiporter family cation/H+ exchanger 17 (CHX17); FUNCTIONS IN: monovalent cation:hydrogen antiporter activity, sodium:hydrogen antiporter activity; INVOLVED IN: N-terminal protein myristoylation, cation transport; LOCATED IN: integral to membrane; EXPRESSED IN: stem, sepal, root, leaf, stamen; EXPRESSED DURING: 4 anthesis; CONTAINS InterPro DOMAIN…	.					-1.94627		1.01959
		AT1G48260	CIPK17	CBL-interacting protein kinase 17 Encodes a member of the SNF1-related kinase (SnRK) gene family (SnRK3.21), which has also been reported as a member of the CBL-interacting protein kinases (CIPK17). CBL-interacting protein kinase 17 (CIPK17); FUNCTIONS IN: protein serine/threonine kinase activity, protein kinase activity, kinase activity, ATP binding; INVOLVED IN: signal transduction, protein ami…	.			1.52783			2.34619
		AT2G38490	CIPK22	CBL-interacting protein kinase 22 member of AtCIPKs CBL-interacting protein kinase 22 (CIPK22); FUNCTIONS IN: protein serine/threonine kinase activity, protein kinase activity, kinase activity, ATP binding; INVOLVED IN: signal transduction, protein amino acid phosphorylation; LOCATED IN: endomembrane system; EXPRESSED IN: sperm cell, stamen; EXPRESSED DURING: 4 anthesis; CONTAINS InterPro DOMAIN/…	.			1.36117			1.46231
		AT4G07960	CSLC12	Cellulose-synthase-like C12 encodes a gene similar to cellulose synthase Cellulose-synthase-like C12 (CSLC12); FUNCTIONS IN: cellulose synthase activity, transferase activity, transferring glycosyl groups; INVOLVED IN: biological_process unknown; LOCATED IN: cellular_component unknown; EXPRESSED IN: 24 plant structures; EXPRESSED DURING: 15 growth stages; CONTAINS InterPro DOMAIN/s: Glycosyl tran…	.			1.58294					-1.05578
		AT1G29930	CAB1	chlorophyll A/B binding protein 1 Subunit of light-harvesting complex II (LHCII),which absorbs light and transfers energy to the photosynthetic reaction center. chlorophyll A/B binding protein 1 (CAB1); FUNCTIONS IN: chlorophyll binding; INVOLVED IN: photosynthesis; LOCATED IN: light-harvesting complex, thylakoid, chloroplast thylakoid membrane, chloroplast; EXPRESSED IN: guard cell, juvenile lea…	.			-1.12708			1.58943
		AT4G17090		chloroplast beta-amylase Encodes a beta-amylase targeted to the chloroplast. Transgenic BMY8 RNAi lines fail to accumulate maltose during cold shock suggesting that maltose accumulation coincides with BMY8 expression. Apart from maltose, the sugar content of the RNAi lines were similar to wildtype (glucose and sucrose unaffected). chloroplast beta-amylase (CT-BMY); CONTAINS InterPro DOMAIN/s: Gly…	.					-2.06699		1.62786
		AT1G15040		Class I glutamine amidotransferase-like superfamily protein Class I glutamine amidotransferase-like superfamily protein; FUNCTIONS IN: hydrolase activity; INVOLVED IN: glutamine metabolic process; LOCATED IN: cellular_component unknown; EXPRESSED IN: hypocotyl, root; CONTAINS InterPro DOMAIN/s: Peptidase C26 (InterPro:IPR011697), Glutamine amidotransferase type 1 (InterPro:IPR017926); BEST Arabid…	.					-1.17341		1.12482
		AT4G37220		Cold acclimation protein WCOR413 family Cold acclimation protein WCOR413 family; CONTAINS InterPro DOMAIN/s: Cold acclimation WCOR413 (InterPro:IPR008892); BEST Arabidopsis thaliana protein match is: cold-regulated 413-plasma membrane 2 (TAIR:AT3G50830.1); Has 160 Blast hits to 157 proteins in 29 species: Archae - 0; Bacteria - 0; Metazoa - 0; Fungi - 0; Plants - 160; Viruses - 0; Other Eukaryote…	.				-3.87342		-1.55057						-1.54457
		AT4G12290		Copper amine oxidase family protein Copper amine oxidase family protein; FUNCTIONS IN: quinone binding, primary amine oxidase activity, copper ion binding; INVOLVED IN: oxidation reduction, amine metabolic process; LOCATED IN: vacuole; CONTAINS InterPro DOMAIN/s: Copper amine oxidase, N-terminal (InterPro:IPR016182), Copper amine oxidase, N2-terminal (InterPro:IPR015800), Copper amine oxidase, N2…	.			1.64881	-2.38288		2.09582
		AT5G52700		Copper transport protein family Copper transport protein family; BEST Arabidopsis thaliana protein match is: Copper transport protein family (TAIR:AT5G52680.1); Has 1807 Blast hits to 1807 proteins in 277 species: Archae - 0; Bacteria - 0; Metazoa - 736; Fungi - 347; Plants - 385; Viruses - 0; Other Eukaryotes - 339 (source: NCBI BLink). |	.				1.12835				-1.26228
		AT5G52680		Copper transport protein family Copper transport protein family; BEST Arabidopsis thaliana protein match is: Copper transport protein family (TAIR:AT5G52690.1); Has 1807 Blast hits to 1807 proteins in 277 species: Archae - 0; Bacteria - 0; Metazoa - 736; Fungi - 347; Plants - 385; Viruses - 0; Other Eukaryotes - 339 (source: NCBI BLink). |	.					-2.11163			-2.32646
		AT5G52690		Copper transport protein family Copper transport protein family; FUNCTIONS IN: metal ion binding; INVOLVED IN: metal ion transport; LOCATED IN: cellular_component unknown; CONTAINS InterPro DOMAIN/s: Heavy metal transport/detoxification protein (InterPro:IPR006121); BEST Arabidopsis thaliana protein match is: Copper transport protein family (TAIR:AT5G52680.1); Has 1807 Blast hits to 1807 proteins…	.					-1.87965			-1.49719
		AT2G15780		Cupredoxin superfamily protein Cupredoxin superfamily protein; FUNCTIONS IN: electron carrier activity, copper ion binding; LOCATED IN: endomembrane system; CONTAINS InterPro DOMAIN/s: Plastocyanin-like (InterPro:IPR003245), Cupredoxin (InterPro:IPR008972); BEST Arabidopsis thaliana protein match is: Cupredoxin superfamily protein (TAIR:AT2G15770.1); Has 41667 Blast hits to 12483 proteins in 1023…	.				-1.43492				-1.19142
		AT5G50260		Cysteine proteinases superfamily protein Cysteine proteinases superfamily protein; FUNCTIONS IN: cysteine-type endopeptidase activity, cysteine-type peptidase activity; INVOLVED IN: proteolysis; LOCATED IN: endomembrane system; EXPRESSED IN: 8 plant structures; EXPRESSED DURING: 4 anthesis, C globular stage, petal differentiation and expansion stage; CONTAINS InterPro DOMAIN/s: Peptidase C1A, pap…	.			1.08692		-1.03344	2.47959
		AT4G14980		Cysteine/Histidine-rich C1 domain family protein Cysteine/Histidine-rich C1 domain family protein; INVOLVED IN: intracellular signaling pathway; EXPRESSED IN: shoot apex, root, seed; EXPRESSED DURING: E expanded cotyledon stage; CONTAINS InterPro DOMAIN/s: Protein kinase C-like, phorbol ester/diacylglycerol binding (InterPro:IPR002219), DC1 (InterPro:IPR004146), C1-like (InterPro:IPR011424); BEST…	.			1.34014		1.72202	1.41437
		AT4G23260	CRK18	cysteine-rich RLK (RECEPTOR-like protein kinase) 18 Encodes a cysteine-rich receptor-like protein kinase. cysteine-rich RLK (RECEPTOR-like protein kinase) 18 (CRK18); FUNCTIONS IN: protein serine/threonine kinase activity, protein kinase activity, ATP binding; INVOLVED IN: response to abscisic acid stimulus; LOCATED IN: endomembrane system; EXPRESSED IN: 14 plant structures; EXPRESSED DURING: 9 g…	.			2.76919			3.9342
		AT3G26830	PAD3	Cytochrome P450 superfamily protein Mutations in pad3 are defective in biosynthesis of the indole derived phytoalexin camalexin. Encodes a cytochrome P450 enzyme that catalyzes the conversion of dihydrocamalexic acid to camalexin. PHYTOALEXIN DEFICIENT 3 (PAD3); FUNCTIONS IN: dihydrocamalexic acid decarboxylase activity, monooxygenase activity, oxygen binding; INVOLVED IN: in 6 processes; LOCATED…	.			1.04021			2.01016					-1.5196
		AT4G19230	CYP707A1	cytochrome P450, family 707, subfamily A, polypeptide 1 Encodes a protein with ABA 8'-hydroxylase activity, involved in ABA catabolism. Member of the CYP707A gene family. CYP707A1 appears to play an important role in determining the ABA levels in dry seeds. Gene involved in postgermination growth. Overexpression of CYP707A1 leads to a decrease in ABA levels and a reduction in after-ripening perio…	.			1.1755			1.72025
		AT2G30750	CYP71A12	cytochrome P450, family 71, subfamily A, polypeptide 12 putative cytochrome P450 cytochrome P450, family 71, subfamily A, polypeptide 12 (CYP71A12); FUNCTIONS IN: electron carrier activity, monooxygenase activity, iron ion binding, oxygen binding, heme binding; INVOLVED IN: response to bacterium; LOCATED IN: endomembrane system; EXPRESSED IN: stem, stamen; EXPRESSED DURING: 4 anthesis; CONTAINS I…	.			1.64428		-1.48779	2.83718	1.57039
		AT3G26200	CYP71B22	cytochrome P450, family 71, subfamily B, polypeptide 22 putative cytochrome P450 "cytochrome P450, family 71, subfamily B, polypeptide 22" (CYP71B22); FUNCTIONS IN: electron carrier activity, monooxygenase activity, iron ion binding, oxygen binding, heme binding; INVOLVED IN: oxidation reduction; EXPRESSED IN: 15 plant structures; EXPRESSED DURING: 13 growth stages; CONTAINS InterPro DOMAIN/s: Cy…	.			2.60342			2.11444
		AT5G57220	CYP81F2	cytochrome P450, family 81, subfamily F, polypeptide 2 member of CYP81F, involved in glucosinolate metabolism. Mutants had impaired resistance to fungi. "cytochrome P450, family 81, subfamily F, polypeptide 2" (CYP81F2); FUNCTIONS IN: electron carrier activity, monooxygenase activity, iron ion binding, oxygen binding, heme binding; INVOLVED IN: in 7 processes; LOCATED IN: endomembrane system; EXP…	.					-1.03965		1.28705
		AT4G31970	CYP82C2	cytochrome P450, family 82, subfamily C, polypeptide 2 member of CYP82C "cytochrome P450, family 82, subfamily C, polypeptide 2" (CYP82C2); FUNCTIONS IN: electron carrier activity, monooxygenase activity, iron ion binding, oxygen binding, heme binding; INVOLVED IN: oxidation reduction; LOCATED IN: endomembrane system; CONTAINS InterPro DOMAIN/s: Cytochrome P450 (InterPro:IPR001128), Cytochrome P4…	.			2.18608		-2.98369	2.57579	1.09772	-2.9099
		AT2G19500	CKX2	cytokinin oxidase 2 It encodes a protein whose sequence is similar to cytokinin oxidase/dehydrogenase, which catalyzes the degradation of cytokinins. cytokinin oxidase 2 (CKX2); CONTAINS InterPro DOMAIN/s: Cytokinin dehydrogenase 1, FAD/cytokinin binding domain (InterPro:IPR015345), FAD-binding, type 2 (InterPro:IPR016166), Oxygen oxidoreductase covalent FAD-binding site (InterPro:IPR006093), FAD…	.			3.24861			4.67662
		AT2G46750		D-arabinono-1,4-lactone oxidase family protein D-arabinono-1,4-lactone oxidase family protein; FUNCTIONS IN: oxidoreductase activity, D-arabinono-1,4-lactone oxidase activity, FAD binding, catalytic activity; INVOLVED IN: oxidation reduction; LOCATED IN: membrane; EXPRESSED IN: hypocotyl, root; CONTAINS InterPro DOMAIN/s: D-arabinono-1,4-lactone oxidase (InterPro:IPR007173), FAD-binding, type 2 (…	.			2.01875			1.65576
		AT4G38410		Dehydrin family protein Dehydrin family protein; FUNCTIONS IN: molecular_function unknown; INVOLVED IN: response to water, response to stress; LOCATED IN: cellular_component unknown; EXPRESSED IN: stem, hypocotyl, root; CONTAINS InterPro DOMAIN/s: Dehydrin (InterPro:IPR000167); Has 3050 Blast hits to 2020 proteins in 252 species: Archae - 4; Bacteria - 32; Metazoa - 564; Fungi - 141; Plants - 134…	.			1.22315			1.73443
		AT1G66090		Disease resistance protein (TIR-NBS class) Disease resistance protein (TIR-NBS class); FUNCTIONS IN: transmembrane receptor activity, nucleoside-triphosphatase activity, nucleotide binding, ATP binding; INVOLVED IN: signal transduction, defense response, apoptosis, innate immune response; LOCATED IN: intrinsic to membrane, chloroplast; EXPRESSED IN: 22 plant structures; EXPRESSED DURING: 10 growt…	.					-1.34001	2.23333			-1.22496	-1.66362	-2.58549
		AT5G41750		Disease resistance protein (TIR-NBS-LRR class) family Disease resistance protein (TIR-NBS-LRR class) family; FUNCTIONS IN: transmembrane receptor activity, nucleoside-triphosphatase activity, nucleotide binding, ATP binding; INVOLVED IN: signal transduction, apoptosis, defense response, innate immune response; LOCATED IN: intrinsic to membrane; CONTAINS InterPro DOMAIN/s: ATPase, AAA+ type, core …	.					-1.14762	1.60644				-1.26613	-2.27833
		AT1G64160		Disease resistance-responsive (dirigent-like protein) family protein Disease resistance-responsive (dirigent-like protein) family protein; FUNCTIONS IN: molecular_function unknown; INVOLVED IN: lignan biosynthetic process, defense response; LOCATED IN: endomembrane system; EXPRESSED IN: petal, hypocotyl, root; EXPRESSED DURING: petal differentiation and expansion stage; CONTAINS InterPro DOMAIN/s…	.					-1.87786		1.21454
		AT1G55790	DUF2431	Domain of unknown function (DUF2431) FUNCTIONS IN: metal ion binding; INVOLVED IN: metal ion transport; CONTAINS InterPro DOMAIN/s: Heavy metal transport/detoxification protein (InterPro:IPR006121); BEST Arabidopsis thaliana protein match is: Copper transport protein family (TAIR:AT3G20180.1). |	.			-1.06451			1.41049		1.46612
		AT3G21520	DMP1	DUF679 domain membrane protein 1 DUF679 domain membrane protein 1 (DMP1); CONTAINS InterPro DOMAIN/s: Protein of unknown function DUF679 (InterPro:IPR007770); BEST Arabidopsis thaliana protein match is: DUF679 domain membrane protein 2 (TAIR:AT3G21550.1); Has 263 Blast hits to 255 proteins in 17 species: Archae - 0; Bacteria - 0; Metazoa - 0; Fungi - 0; Plants - 263; Viruses - 0; Other Eukaryotes…	.			2.18075			2.69016
		AT3G26820		Esterase/lipase/thioesterase family protein Esterase/lipase/thioesterase family protein; FUNCTIONS IN: transferase activity, transferring acyl groups other than amino-acyl groups, catalytic activity; INVOLVED IN: biological_process unknown; CONTAINS InterPro DOMAIN/s: Diacylglycerol acyltransferase (InterPro:IPR007130); BEST Arabidopsis thaliana protein match is: Esterase/lipase/thioesterase fami…	.			3.5209			3.94197
		AT5G47220	ERF2	ethylene responsive element binding factor 2 Encodes a member of the ERF (ethylene response factor) subfamily B-3 of ERF/AP2 transcription factor family (ATERF-2). The protein contains one AP2 domain. Functions as activator of GCC boxdependent transcription. Positive regulator of JA-responsive defense genes and resistance to F. oxysporum and enhances JA inhibition of root elongation. ethylene res…	.			-1.0371			1.39411
		AT2G44840	ERF13	ethylene-responsive element binding factor 13 encodes a member of the ERF (ethylene response factor) subfamily B-3 of ERF/AP2 transcription factor family. The protein contains one AP2 domain. There are 18 members in this subfamily including ATERF-1, ATERF-2, AND ATERF-5. ethylene-responsive element binding factor 13 (ERF13); CONTAINS InterPro DOMAIN/s: DNA-binding, integrase-type (InterPro:IPR016…	.			-1.83673		-1.69371	1.67638		-1.27707	-2.14937	-1.32411	-3.25497
		AT3G06435		Expressed protein Expressed protein; Has 35333 Blast hits to 34131 proteins in 2444 species: Archae - 798; Bacteria - 22429; Metazoa - 974; Fungi - 991; Plants - 531; Viruses - 0; Other Eukaryotes - 9610 (source: NCBI BLink). |	.					1.92022	2.14541
		AT1G69480		EXS (ERD1/XPR1/SYG1) family protein EXS (ERD1/XPR1/SYG1) family protein; FUNCTIONS IN: molecular_function unknown; INVOLVED IN: biological_process unknown; LOCATED IN: integral to membrane, plasma membrane; EXPRESSED IN: stem, sepal, stamen, seed; EXPRESSED DURING: 4 anthesis, petal differentiation and expansion stage, E expanded cotyledon stage; CONTAINS InterPro DOMAIN/s: EXS, C-terminal (Inter…	.			1.08803			1.99007						-1.41548		-1.86379
		AT1G26390		FAD-binding Berberine family protein FAD-binding Berberine family protein; FUNCTIONS IN: electron carrier activity, oxidoreductase activity, FAD binding, catalytic activity; LOCATED IN: endomembrane system; EXPRESSED IN: 10 plant structures; EXPRESSED DURING: LP.06 six leaves visible, LP.04 four leaves visible, 4 anthesis, LP.02 two leaves visible, petal differentiation and expansion stage; CONTA…	.			3.60009			3.80521
		AT3G23880		F-box and associated interaction domains-containing protein F-box and associated interaction domains-containing protein; FUNCTIONS IN: molecular_function unknown; INVOLVED IN: biological_process unknown; LOCATED IN: nucleus; EXPRESSED IN: 16 plant structures; EXPRESSED DURING: 10 growth stages; CONTAINS InterPro DOMAIN/s: F-box domain, cyclin-like (InterPro:IPR001810), F-box domain, Skp2-like (In…	.			-1.69802			-1.6428
		AT3G27220		Galactose oxidase/kelch repeat superfamily protein Galactose oxidase/kelch repeat superfamily protein; CONTAINS InterPro DOMAIN/s: Galactose oxidase/kelch, beta-propeller (InterPro:IPR011043), Kelch related (InterPro:IPR013089), Kelch-type beta propeller (InterPro:IPR015915); BEST Arabidopsis thaliana protein match is: Galactose oxidase/kelch repeat superfamily protein (TAIR:AT1G51540.1); Has 150…	.					1.82192	2.56725
		AT3G48460		GDSL-like Lipase/Acylhydrolase superfamily protein GDSL-like Lipase/Acylhydrolase superfamily protein; FUNCTIONS IN: hydrolase activity, acting on ester bonds, carboxylesterase activity; INVOLVED IN: glycerol biosynthetic process, lipid metabolic process; LOCATED IN: endomembrane system; EXPRESSED IN: 22 plant structures; EXPRESSED DURING: 14 growth stages; CONTAINS InterPro DOMAIN/s: Lipase, GDS…	.			1.45736			1.99748
		AT3G16370		GDSL-like Lipase/Acylhydrolase superfamily protein GDSL-like Lipase/Acylhydrolase superfamily protein; FUNCTIONS IN: hydrolase activity, acting on ester bonds, carboxylesterase activity; INVOLVED IN: lipid metabolic process; LOCATED IN: apoplast; EXPRESSED IN: 22 plant structures; EXPRESSED DURING: 14 growth stages; CONTAINS InterPro DOMAIN/s: Lipase, GDSL (InterPro:IPR001087); BEST Arabidopsis t…	.			1.29782			2.28933
		AT4G16230		GDSL-like Lipase/Acylhydrolase superfamily protein GDSL-like Lipase/Acylhydrolase superfamily protein; FUNCTIONS IN: hydrolase activity, acting on ester bonds, carboxylesterase activity; INVOLVED IN: lipid metabolic process; LOCATED IN: endomembrane system; EXPRESSED IN: 16 plant structures; EXPRESSED DURING: 6 growth stages; CONTAINS InterPro DOMAIN/s: Lipase, GDSL (InterPro:IPR001087); BEST Ara…	.			2.00629			1.51249
		AT4G16220		GDSL-like Lipase/Acylhydrolase superfamily protein GDSL-like Lipase/Acylhydrolase superfamily protein; FUNCTIONS IN: hydrolase activity, acting on ester bonds; INVOLVED IN: lipid metabolic process; LOCATED IN: endomembrane system; CONTAINS InterPro DOMAIN/s: Lipase, GDSL (InterPro:IPR001087); BEST Arabidopsis thaliana protein match is: GDSL-like Lipase/Acylhydrolase superfamily protein (TAIR:AT4G…	.			1.56179			1.47433
		AT5G39190		germin-like protein 2 germin-like protein (GLP2a) germin-like protein 2 (GER2); CONTAINS InterPro DOMAIN/s: Cupin, RmlC-type (InterPro:IPR011051), Cupin 1 (InterPro:IPR006045), RmlC-like jelly roll fold (InterPro:IPR014710), Germin (InterPro:IPR001929), Germin, manganese binding site (InterPro:IPR019780); BEST Arabidopsis thaliana protein match is: RmlC-like cupins superfamily protein (TAIR:AT5G3…	.			1.46284			2.10047
		AT1G72970		Glucose-methanol-choline (GMC) oxidoreductase family protein Originally identified as a mutation that causes floral organs to fuse together. About 10-20% of mutants also have defects in ovules. Mutants have reduced fertility most likely as because of fusions that pistil emergence. The protein has similarity to the mandelonitrile lyase family of FAD containing oxidoreductases and is predicted to b…	.			1.17454			1.39254
		AT5G11210	GLR2.5	glutamate receptor 2.5 member of Putative ligand-gated ion channel subunit family glutamate receptor 2.5 (GLR2.5); FUNCTIONS IN: intracellular ligand-gated ion channel activity; INVOLVED IN: cellular calcium ion homeostasis, response to light stimulus; LOCATED IN: integral to membrane, membrane; EXPRESSED IN: stem, stamen; EXPRESSED DURING: 4 anthesis; CONTAINS InterPro DOMAIN/s: Extracellular so…	.			2.21365			2.0582
		AT5G44990		Glutathione S-transferase family protein Glutathione S-transferase family protein; FUNCTIONS IN: molecular_function unknown; INVOLVED IN: biological_process unknown; LOCATED IN: cellular_component unknown; EXPRESSED IN: stem; CONTAINS InterPro DOMAIN/s: Glutathione S-transferase, predicted (InterPro:IPR016639), Glutathione S-transferase, C-terminal-like (InterPro:IPR010987), Glutathione S-transfe…	.			1.62421			3.15831
		AT1G17170	GSTU24	glutathione S-transferase TAU 24 Encodes glutathione transferase belonging to the tau class of GSTs. Naming convention according to Wagner et al. (2002). glutathione S-transferase TAU 24 (GSTU24); FUNCTIONS IN: glutathione transferase activity, glutathione binding; INVOLVED IN: response to cyclopentenone, toxin catabolic process; LOCATED IN: cytoplasm; EXPRESSED IN: 15 plant structures; EXPRESSED…	.					-1.18663	2.04621	1.34788
		AT1G02390	GPAT2	glycerol-3-phosphate acyltransferase 2 Encodes a member of a family of proteins with glycerol-3-phosphate acyltransferase activity. glycerol-3-phosphate acyltransferase 2 (GPAT2); FUNCTIONS IN: acyltransferase activity; INVOLVED IN: metabolic process; EXPRESSED IN: 13 plant structures; EXPRESSED DURING: 8 growth stages; CONTAINS InterPro DOMAIN/s: Phospholipid/glycerol acyltransferase (InterPro:I…	.			1.17111			1.73027
		AT5G07570		glycine/proline-rich protein glycine/proline-rich protein; LOCATED IN: endomembrane system; EXPRESSED IN: synergid; Has 1807 Blast hits to 1807 proteins in 277 species: Archae - 0; Bacteria - 0; Metazoa - 736; Fungi - 347; Plants - 385; Viruses - 0; Other Eukaryotes - 339 (source: NCBI BLink). |	.			1.62124		1.94541			1.72726
		AT5G56100		glycine-rich protein / oleosin glycine-rich protein / oleosin; FUNCTIONS IN: molecular_function unknown; INVOLVED IN: lipid storage; LOCATED IN: monolayer-surrounded lipid storage body, integral to membrane, membrane; EXPRESSED IN: 21 plant structures; EXPRESSED DURING: 12 growth stages; CONTAINS InterPro DOMAIN/s: Oleosin (InterPro:IPR000136); Has 1807 Blast hits to 1807 proteins in 277 species:…	.			-1.2568			-1.34007						-1.13713
		AT3G20470		glycine-rich protein 5 encodes a glycine-rich protein that is expressed more abundantly in immature seed pods than in stems and leaves. Expression is not detected in roots or flowers. glycine-rich protein 5 (GRP5); Has 299218 Blast hits to 51775 proteins in 2622 species: Archae - 740; Bacteria - 86710; Metazoa - 106696; Fungi - 19777; Plants - 26257; Viruses - 3929; Other Eukaryotes - 55109 (sour…	.			1.37544			2.40622
		AT2G05510		Glycine-rich protein family Glycine-rich protein family; FUNCTIONS IN: molecular_function unknown; INVOLVED IN: biological_process unknown; LOCATED IN: endomembrane system; CONTAINS InterPro DOMAIN/s: Glycine rich protein (InterPro:IPR010800); BEST Arabidopsis thaliana protein match is: GLYCINE RICH PROTEIN 9 (TAIR:AT2G05440.6); Has 30201 Blast hits to 17322 proteins in 780 species: Archae - 12; …	.			2.38326			3.2146	1.03403
		AT2G05530		Glycine-rich protein family Glycine-rich protein family; FUNCTIONS IN: molecular_function unknown; INVOLVED IN: biological_process unknown; LOCATED IN: endomembrane system; EXPRESSED IN: leaf whorl, root, leaf; EXPRESSED DURING: LP.04 four leaves visible; CONTAINS InterPro DOMAIN/s: Glycine rich protein (InterPro:IPR010800); BEST Arabidopsis thaliana protein match is: glycine-rich protein 3 (TAIR…	.			1.33154			1.56224	1.5773
		AT4G33610		glycine-rich protein glycine-rich protein; BEST Arabidopsis thaliana protein match is: glycine-rich protein (TAIR:AT1G55990.1); Has 1241 Blast hits to 739 proteins in 74 species: Archae - 0; Bacteria - 1083; Metazoa - 49; Fungi - 4; Plants - 54; Viruses - 14; Other Eukaryotes - 37 (source: NCBI BLink). |	.			-1.33869		-1.08504			1.48069
		AT1G55990		glycine-rich protein glycine-rich protein; BEST Arabidopsis thaliana protein match is: glycine-rich protein (TAIR:AT4G33610.1); Has 244 Blast hits to 187 proteins in 50 species: Archae - 0; Bacteria - 206; Metazoa - 7; Fungi - 0; Plants - 14; Viruses - 0; Other Eukaryotes - 17 (source: NCBI BLink). |	.			-1.41608		-1.23939			1.29492
		AT4G29020		glycine-rich protein glycine-rich protein; FUNCTIONS IN: molecular_function unknown; INVOLVED IN: biological_process unknown; LOCATED IN: endomembrane system; EXPRESSED IN: 22 plant structures; EXPRESSED DURING: 13 growth stages; Has 598 Blast hits to 551 proteins in 129 species: Archae - 0; Bacteria - 185; Metazoa - 152; Fungi - 22; Plants - 163; Viruses - 2; Other Eukaryotes - 74 (source: NCBI …	.			1.46921	1.16271		2.01468
		AT4G19750		Glycosyl hydrolase family protein with chitinase insertion domain Glycosyl hydrolase family protein with chitinase insertion domain; FUNCTIONS IN: cation binding, hydrolase activity, hydrolyzing O-glycosyl compounds, chitinase activity, catalytic activity; INVOLVED IN: carbohydrate metabolic process; LOCATED IN: cellular_component unknown; CONTAINS InterPro DOMAIN/s: Glycoside hydrolase, family 1…	.					-2.85757	-2.23485	1.35965	-1.52368
		AT4G19800		Glycosyl hydrolase family protein with chitinase insertion domain Glycosyl hydrolase family protein with chitinase insertion domain; FUNCTIONS IN: cation binding, hydrolase activity, hydrolyzing O-glycosyl compounds, chitinase activity, catalytic activity; INVOLVED IN: carbohydrate metabolic process; LOCATED IN: cellular_component unknown; CONTAINS InterPro DOMAIN/s: Glycoside hydrolase, family 1…	.			1.1703			-1.91795		-1.62341
		AT3G60140		Glycosyl hydrolase superfamily protein Encodes a protein similar to beta-glucosidase and is a member of glycoside hydrolase family 1. Expression is induced after 24 hours of dark treatment, in senescing leaves and treatment with exogenous photosynthesis inhibitor. Induction of gene expression was suppressed in excised leaves supplied with sugar. The authors suggest that the gene's expression patt…	.			2.09919	-4.56894		2.20322
		AT1G27950	LTPG1	glycosylphosphatidylinositol-anchored lipid protein transfer 1 Encodes LTPG1, a lipid transfer protein with a predicted GPI (glycosylphosphatidylinositol)-anchor domain. Localized in the plasma membrane. Disruption of the LTPG1 gene causes alterations of cuticular lipid composition, but no significant changes on total wax and cutin monomer loads are seen. glycosylphosphatidylinositol-anchored lip…	.			1.31081			1.90189
		AT3G13840		GRAS family transcription factor GRAS family transcription factor; CONTAINS InterPro DOMAIN/s: Transcription factor GRAS (InterPro:IPR005202); BEST Arabidopsis thaliana protein match is: GRAS family transcription factor (TAIR:AT3G49950.1); Has 2103 Blast hits to 2091 proteins in 270 species: Archae - 0; Bacteria - 2; Metazoa - 0; Fungi - 0; Plants - 2101; Viruses - 0; Other Eukaryotes - 0 (source…	.			-1.89202			-1.18622
		AT2G22190		Haloacid dehalogenase-like hydrolase (HAD) superfamily protein Haloacid dehalogenase-like hydrolase (HAD) superfamily protein; FUNCTIONS IN: catalytic activity, trehalose-phosphatase activity; INVOLVED IN: trehalose biosynthetic process, metabolic process; LOCATED IN: cellular_component unknown; EXPRESSED IN: 23 plant structures; EXPRESSED DURING: 12 growth stages; CONTAINS InterPro DOMAIN/s: HAD…	.			-1.2474					1.06411
		AT3G46230	HSP17.4	heat shock protein 17.4 member of the class I small heat-shock protein (sHSP) family, which accounts for the majority of sHSPs in maturing seeds heat shock protein 17.4 (HSP17.4); INVOLVED IN: response to heat; LOCATED IN: cellular_component unknown; EXPRESSED IN: 15 plant structures; EXPRESSED DURING: M germinated pollen stage, LP.04 four leaves visible, 4 anthesis, C globular stage, petal diffe…	.			-2.06831		-1.28722		2.22921
		AT5G12030	HSP17.6	heat shock protein 17.6A Encodes a cytosolic small heat shock protein with chaperone activity that is induced by heat and osmotic stress and is also expressed late in seed development. heat shock protein 17.6A (HSP17.6A); FUNCTIONS IN: unfolded protein binding; INVOLVED IN: protein folding, response to high light intensity, response to hydrogen peroxide, response to heat, hyperosmotic response; L…	.			-2.0605		-2.02188		2.74074
		AT4G10310	HKT1	high-affinity K+ transporter 1 encodes a sodium transporter (HKT1) expressed in xylem parenchyma cells. Mutants over-accumulate sodium in shoot tissue and have increased sodium in the xylem sap and reduced sodium in phloem sap and roots. high-affinity K+ transporter 1 (HKT1); CONTAINS InterPro DOMAIN/s: Potassium transport protein, high-affinity (InterPro:IPR004773), Cation transporter (InterPro:…	.			-1.25162			-1.21104
		AT5G39050		HXXXD-type acyl-transferase family protein HXXXD-type acyl-transferase family protein; FUNCTIONS IN: transferase activity, transferring acyl groups other than amino-acyl groups, transferase activity; INVOLVED IN: biological_process unknown; LOCATED IN: cellular_component unknown; EXPRESSED IN: 21 plant structures; EXPRESSED DURING: 13 growth stages; CONTAINS InterPro DOMAIN/s: Transferase (InterP…	.			2.23981			3.18802
		AT1G24420		HXXXD-type acyl-transferase family protein HXXXD-type acyl-transferase family protein; FUNCTIONS IN: transferase activity, transferring acyl groups other than amino-acyl groups, transferase activity; INVOLVED IN: biological_process unknown; LOCATED IN: cellular_component unknown; EXPRESSED IN: hypocotyl, root; CONTAINS InterPro DOMAIN/s: Transferase (InterPro:IPR003480); BEST Arabidopsis thaliana…	.			-1.54639		1.2777			1.39099
		AT5G09520		hydroxyproline-rich glycoprotein family protein hydroxyproline-rich glycoprotein family protein; FUNCTIONS IN: molecular_function unknown; INVOLVED IN: biological_process unknown; LOCATED IN: endomembrane system; EXPRESSED IN: 21 plant structures; EXPRESSED DURING: 12 growth stages; BEST Arabidopsis thaliana protein match is: hydroxyproline-rich glycoprotein family protein (TAIR:AT5G09530.1); Has…	.			-1.34357		-1.18741			1.43667
		AT2G22510		hydroxyproline-rich glycoprotein family protein hydroxyproline-rich glycoprotein family protein; FUNCTIONS IN: molecular_function unknown; INVOLVED IN: biological_process unknown; LOCATED IN: endomembrane system; EXPRESSED IN: shoot apex, hypocotyl, root, leaf; BEST Arabidopsis thaliana protein match is: hydroxyproline-rich glycoprotein family protein (TAIR:AT4G38080.1); Has 4670 Blast hits to 22…	.			-1.08592		-1.00494			1.13466
		AT1G47510	5PTASE11	inositol polyphosphate 5-phosphatase 11 Encodes a phosphatidylinositol polyphosphate 5-phosphatase. It can dephosphorylate PI(4,5)P2, PI(3,5)P2, and PI(3,4,5)P3, but, it is not active against PI(5)P or the water soluble inositol(1,4,5)P3 or inositol(1,3,4,5)P4. The transcript levels for this gene rise in response to auxin, ABA, and JA. inositol polyphosphate 5-phosphatase 11 (5PTASE11); CONTAINS …	.			4.09782			3.03517						-1.22824
		AT3G56350		Iron/manganese superoxide dismutase family protein Iron/manganese superoxide dismutase family protein; FUNCTIONS IN: superoxide dismutase activity, metal ion binding; INVOLVED IN: oxidation reduction, superoxide metabolic process, removal of superoxide radicals; LOCATED IN: mitochondrion, endomembrane system; EXPRESSED IN: male gametophyte, seed; EXPRESSED DURING: seedling growth; CONTAINS InterP…	.			1.37194		-2.80056	3.30852
		AT3G55970	JRG21	jasmonate-regulated gene 21 jasmonate-regulated gene 21 (JRG21); FUNCTIONS IN: oxidoreductase activity, iron ion binding; INVOLVED IN: oxidation reduction; LOCATED IN: cellular_component unknown; EXPRESSED IN: 10 plant structures; EXPRESSED DURING: LP.06 six leaves visible, LP.04 four leaves visible, 4 anthesis, C globular stage, petal differentiation and expansion stage; CONTAINS InterPro DOMAIN…	.			1.99841	-3.30408		2.02347
		AT1G80160		Lactoylglutathione lyase / glyoxalase I family protein Lactoylglutathione lyase / glyoxalase I family protein; FUNCTIONS IN: lactoylglutathione lyase activity; INVOLVED IN: carbohydrate metabolic process; LOCATED IN: endomembrane system; EXPRESSED IN: 10 plant structures; EXPRESSED DURING: L mature pollen stage, M germinated pollen stage, 4 anthesis, petal differentiation and expansion stage; BES…	.			1.05883	-2.29048		1.62711								-2.31515
		AT3G45130	LAS1	lanosterol synthase 1 lanosterol synthase 1 (LAS1); CONTAINS InterPro DOMAIN/s: Terpene synthase, conserved site (InterPro:IPR002365), Terpenoid cylases/protein prenyltransferase alpha-alpha toroid (InterPro:IPR008930), Squalene cyclase (InterPro:IPR018333), Prenyltransferase/squalene oxidase (InterPro:IPR001330); BEST Arabidopsis thaliana protein match is: cycloartenol synthase 1 (TAIR:AT2G07050…	.					1.06548	1.57086		1.47755
		AT5G54270	LHCB3	light-harvesting chlorophyll B-binding protein 3 Lhcb3 protein is a component of the main light harvesting chlorophyll a/b-protein complex of Photosystem II (LHC II). light-harvesting chlorophyll B-binding protein 3 (LHCB3); FUNCTIONS IN: structural molecule activity; INVOLVED IN: photosynthesis; LOCATED IN: light-harvesting complex, thylakoid, chloroplast thylakoid membrane, chloroplast; EXPRESS…	.			-1.03777			1.3922
		AT5G24180		Lipase class 3-related protein Lipase class 3-related protein; FUNCTIONS IN: triglyceride lipase activity; INVOLVED IN: lipid metabolic process; LOCATED IN: cellular_component unknown; CONTAINS InterPro DOMAIN/s: Lipase, class 3 (InterPro:IPR002921); BEST Arabidopsis thaliana protein match is: Lipase class 3-related protein (TAIR:AT5G24220.1); Has 1807 Blast hits to 1807 proteins in 277 species: …	.			-1.81533			-1.27702
		AT2G38540	LTP1	lipid transfer protein 1 Non-specific lipid transfer protein. Binds calmodulin in a Ca2+-independent manner. Localized to the cell wall. Specifically expressed in L1 epidermal layer. Predicted to be a member of PR-14 pathogenesis-related protein family with the following members: At2g38540/LTP1, At2g38530/LTP2, At5g59320/LTP3, At5g59310/LTP4, At3g51600/LTP5, At3g08770/LTP6, At2g15050/LTP7, At2g18…	.			-1.02099			1.76272
		AT3G51600	LTP5	lipid transfer protein 5 Predicted to encode a PR (pathogenesis-related) protein. Belongs to the lipid transfer protein (PR-14) family with the following members: At2g38540/LTP1, At2g38530/LTP2, At5g59320/LTP3, At5g59310/LTP4, At3g51600/LTP5, At3g08770/LTP6, At2g15050/LTP7, At2g18370/LTP8, At2g15325/LTP9, At5g01870/LTP10, At4g33355/LTP11, At3g51590/LTP12, At5g44265/LTP13, At5g62065/LTP14, At4g085…	.			1.75767	1.24222	1.11383	1.37946
		AT1G55020	LOX1	lipoxygenase 1 lipoxygenase, a defense gene conferring resistance Xanthomonas campestris lipoxygenase 1 (LOX1); CONTAINS InterPro DOMAIN/s: Lipoxygenase, iron binding site (InterPro:IPR020833), Lipoxygenase, C-terminal (InterPro:IPR013819), Lipoxygenase, LH2 (InterPro:IPR001024), Lipase/lipooxygenase, PLAT/LH2 (InterPro:IPR008976), Lipoxygenase, conserved site (InterPro:IPR020834), Lipoxygenase (…	.			1.30936			1.47397
		AT3G02550	LBD41	LOB domain-containing protein 41 LOB domain-containing protein 41 (LBD41); CONTAINS InterPro DOMAIN/s: Lateral organ boundaries, LOB (InterPro:IPR004883), Asymmetric leaves, AS2/LOB (InterPro:IPR017414); BEST Arabidopsis thaliana protein match is: LOB domain-containing protein 40 (TAIR:AT1G67100.1); Has 601 Blast hits to 600 proteins in 23 species: Archae - 0; Bacteria - 0; Metazoa - 0; Fungi - 0…	.					1.75894	1.97582
		AT4G35180	LHT7	LYS/HIS transporter 7 LYS/HIS transporter 7 (LHT7); CONTAINS InterPro DOMAIN/s: Amino acid transporter, transmembrane (InterPro:IPR013057); BEST Arabidopsis thaliana protein match is: Transmembrane amino acid transporter family protein (TAIR:AT1G47670.1); Has 1572 Blast hits to 1571 proteins in 189 species: Archae - 0; Bacteria - 36; Metazoa - 144; Fungi - 199; Plants - 1047; Viruses - 0; Other E…	.					-1.52245		1.37388
		AT5G26340	MSS1	Major facilitator superfamily protein Encodes a protein with high affinity, hexose-specific/H+ symporter activity. The activity of the transporter appears to be negatively regulated by phosphorylation. Importantly, microarray analysis, as well as the study of the expression of this gene in mutants involved in programmed cell death (PCD) demonstrated a tight correlation between this gene's express…	.			1.43269		-1.0519	1.36391
		AT3G45720		Major facilitator superfamily protein Major facilitator superfamily protein; FUNCTIONS IN: transporter activity; INVOLVED IN: oligopeptide transport; LOCATED IN: membrane; EXPRESSED IN: stem, root; CONTAINS InterPro DOMAIN/s: Oligopeptide transporter (InterPro:IPR000109), Major facilitator superfamily, general substrate transporter (InterPro:IPR016196); BEST Arabidopsis thaliana protein match is:…	.					-2.02363			-1.41745
		AT2G16660		Major facilitator superfamily protein Major facilitator superfamily protein; INVOLVED IN: response to karrikin; LOCATED IN: endomembrane system; EXPRESSED IN: 23 plant structures; EXPRESSED DURING: 13 growth stages; CONTAINS InterPro DOMAIN/s: Nodulin-like (InterPro:IPR010658), Major facilitator superfamily, general substrate transporter (InterPro:IPR016196); BEST Arabidopsis thaliana protein mat…	.			1.73526			2.3333						-1.02873
		AT1G52130		Mannose-binding lectin superfamily protein Mannose-binding lectin superfamily protein; CONTAINS InterPro DOMAIN/s: Mannose-binding lectin (InterPro:IPR001229); BEST Arabidopsis thaliana protein match is: Mannose-binding lectin superfamily protein (TAIR:AT1G52120.1); Has 1505 Blast hits to 643 proteins in 30 species: Archae - 0; Bacteria - 0; Metazoa - 0; Fungi - 0; Plants - 1504; Viruses - 0; Oth…	.			1.01929	1.10806	-1.42737			-1.46907
		AT5G49850		Mannose-binding lectin superfamily protein Mannose-binding lectin superfamily protein; CONTAINS InterPro DOMAIN/s: Mannose-binding lectin (InterPro:IPR001229); BEST Arabidopsis thaliana protein match is: Mannose-binding lectin superfamily protein (TAIR:AT5G49870.1); Has 1807 Blast hits to 1807 proteins in 277 species: Archae - 0; Bacteria - 0; Metazoa - 736; Fungi - 347; Plants - 385; Viruses - 0…	.			1.32824			1.23649
		AT2G04040	DTX1	MATE efflux family protein AtDTX1 (At2g04040) has been identified as a detoxifying efflux carrier for plant-derived antibiotics and other toxic compounds, including CD2+. TX1; CONTAINS InterPro DOMAIN/s: MATE family transporter related protein (InterPro:IPR015521), Multi antimicrobial extrusion protein MatE (InterPro:IPR002528); BEST Arabidopsis thaliana protein match is: MATE efflux family prote…	.			1.14958				1.72718
		AT1G71140		MATE efflux family protein MATE efflux family protein; FUNCTIONS IN: antiporter activity, drug transmembrane transporter activity, transporter activity; INVOLVED IN: drug transmembrane transport, transmembrane transport; LOCATED IN: plasma membrane, membrane; EXPRESSED IN: 13 plant structures; EXPRESSED DURING: 8 growth stages; CONTAINS InterPro DOMAIN/s: MATE family transporter related protein (…	.			3.17815			2.62336
		AT2G04070		MATE efflux family protein MATE efflux family protein; FUNCTIONS IN: antiporter activity, drug transmembrane transporter activity, transporter activity; INVOLVED IN: transport, drug transmembrane transport, transmembrane transport; LOCATED IN: membrane; EXPRESSED IN: 10 plant structures; EXPRESSED DURING: 7 growth stages; CONTAINS InterPro DOMAIN/s: MATE family transporter related protein (InterP…	.					-1.66192	1.69549
		AT1G24140		Matrixin family protein Matrixin family protein; FUNCTIONS IN: metallopeptidase activity, metalloendopeptidase activity, zinc ion binding; INVOLVED IN: proteolysis, metabolic process; LOCATED IN: anchored to membrane; EXPRESSED IN: 13 plant structures; EXPRESSED DURING: 7 growth stages; CONTAINS InterPro DOMAIN/s: Peptidase M10, metallopeptidase (InterPro:IPR001818), Peptidoglycan binding-like (I…	.					-1.04466	1.32501			-1.06833	-1.07893	-1.77211
		AT5G67080	MAPKKK19	mitogen-activated protein kinase kinase kinase 19 member of MEKK subfamily mitogen-activated protein kinase kinase kinase 19 (MAPKKK19); FUNCTIONS IN: protein serine/threonine kinase activity, protein kinase activity, kinase activity, ATP binding; INVOLVED IN: protein amino acid phosphorylation; LOCATED IN: cellular_component unknown; EXPRESSED IN: 10 plant structures; EXPRESSED DURING: L mature …	.					-1.20405		1.1115
		AT1G49920		MuDR family transposase MuDR family transposase; FUNCTIONS IN: zinc ion binding; INVOLVED IN: biological_process unknown; LOCATED IN: cellular_component unknown; EXPRESSED IN: flower; EXPRESSED DURING: petal differentiation and expansion stage; CONTAINS InterPro DOMAIN/s: MULE transposase, conserved domain (InterPro:IPR018289), Zinc finger, PMZ-type (InterPro:IPR006564), Zinc finger, SWIM-type (I…	.			2.69204			2.4157
		AT3G13090	MRP8	multidrug resistance-associated protein 8 member of MRP subfamily multidrug resistance-associated protein 8 (MRP8); FUNCTIONS IN: ATPase activity, coupled to transmembrane movement of substances; INVOLVED IN: transport, transmembrane transport; LOCATED IN: plasma membrane; EXPRESSED IN: 10 plant structures; EXPRESSED DURING: 6 growth stages; CONTAINS InterPro DOMAIN/s: ATPase, AAA+ type, core (In…	.					-1.35424			-1.20822
		AT1G71030	MYBL2	MYB-like 2 Encodes a putative myb family transcription factor. In contrast to most other myb-like proteins its myb domain consists of a single repeat. A proline-rich region potentially involved in transactivation is found in the C-terminal part of the protein. Its transcript accumulates mainly in leaves. MYB-like 2 (MYBL2); CONTAINS InterPro DOMAIN/s: SANT, DNA-binding (InterPro:IPR001005), Homeo…	.			-1.1206			-1.73214						-1.26494
		AT4G26260	MIOX4	myo-inositol oxygenase 4 Encodes a myo-inositol oxygenase. myo-inositol oxygenase 4 (MIOX4); FUNCTIONS IN: inositol oxygenase activity; INVOLVED IN: L-ascorbic acid biosynthetic process, syncytium formation; LOCATED IN: cytoplasm; EXPRESSED IN: 19 plant structures; EXPRESSED DURING: 8 growth stages; CONTAINS InterPro DOMAIN/s: Protein of unknown function DUF706 (InterPro:IPR007828); BEST Arabidop…	.					-1.71915	1.48992	1.09857				-2.2514
		AT3G04070	NAC047	NAC domain containing protein 47 NAC domain containing protein 47 (NAC047); FUNCTIONS IN: sequence-specific DNA binding transcription factor activity; INVOLVED IN: multicellular organismal development, regulation of transcription; LOCATED IN: cellular_component unknown; EXPRESSED IN: 16 plant structures; EXPRESSED DURING: 7 growth stages; CONTAINS InterPro DOMAIN/s: No apical meristem (NAM) prote…	.			1.89936			2.01016
		AT4G13250	NYC1	NAD(P)-binding Rossmann-fold superfamily protein Encodes a chlorophyll b reductase involved in the degradation of chlorophyll b and LHCII (light harvesting complex II). NON-YELLOW COLORING 1 (NYC1); CONTAINS InterPro DOMAIN/s: NAD(P)-binding domain (InterPro:IPR016040), Glucose/ribitol dehydrogenase (InterPro:IPR002347), Short-chain dehydrogenase/reductase SDR (InterPro:IPR002198); BEST Arabidops…	.			1.40177			1.18684						-3.0009		-1.07323
		AT2G29150		NAD(P)-binding Rossmann-fold superfamily protein NAD(P)-binding Rossmann-fold superfamily protein; FUNCTIONS IN: oxidoreductase activity, binding, catalytic activity; INVOLVED IN: oxidation reduction, metabolic process; CONTAINS InterPro DOMAIN/s: Short-chain dehydrogenase/reductase, conserved site (InterPro:IPR020904), NAD(P)-binding domain (InterPro:IPR016040), Glucose/ribitol dehydrogenase (In…	.			1.34596		-2.29355	2.5914	1.65935
		AT5G56080	NAS2	nicotianamine synthase 2 Encodes a protein with nicotianamine synthase activity. Its transcript levels rise in roots in response to zinc deficiency and rise in leaves in response to elevated levels of zinc. nicotianamine synthase 2 (NAS2); CONTAINS InterPro DOMAIN/s: Nicotianamine synthase (InterPro:IPR004298); BEST Arabidopsis thaliana protein match is: nicotianamine synthase 1 (TAIR:AT5G04950.1…	.					-4.71246		2.19993	-1.04836
		AT1G56430	NAS4	nicotianamine synthase 4 Encodes a protein with nicotianamine synthase activity. nicotianamine synthase 4 (NAS4); CONTAINS InterPro DOMAIN/s: Nicotianamine synthase (InterPro:IPR004298); BEST Arabidopsis thaliana protein match is: nicotianamine synthase 3 (TAIR:AT1G09240.1); Has 205 Blast hits to 202 proteins in 47 species: Archae - 24; Bacteria - 12; Metazoa - 0; Fungi - 20; Plants - 147; Viruse…	.			2.24423			5.13035						3.36699		1.62712
		AT1G08090	NRT2:1	nitrate transporter 2:1 High-affinity nitrate transporter. Up-regulated by nitrate. Functions as a repressor of lateral root initiation independently of nitrate uptake. nitrate transporter 2:1 (NRT2:1); CONTAINS InterPro DOMAIN/s: Major facilitator superfamily MFS-1 (InterPro:IPR011701), Major facilitator superfamily, general substrate transporter (InterPro:IPR016196); BEST Arabidopsis thaliana p…	.			1.25941			2.7737
		AT3G44300	NIT2	nitrilase 2 Encodes an enzyme that catalyzes the hydrolysis of indole-3-acetonitrile (IAN) to indole-3-acetic acid (IAA) (nitrile aminohydrolase, EC 3.5.5.1) and IAN to indole-3-acetamide (IAM) at lower levels. Mutants have reduced sensitivity to IAN and are sensitive to IAA. This enzyme likely participates in other non-auxin-related metabolic pathways. nitrilase 2 (NIT2); FUNCTIONS IN: indole-3-…	.				-1.53104	-1.22838	1.14873					1.40347
		AT5G22300	NIT4	nitrilase 4 encodes a nitrilase isomer. The purified enzyme shows a strong substrate specificity for beta-cyano-L-alanine, a intermediate product of the cyanide detoxification pathway. nitrilase 4 (NIT4); CONTAINS InterPro DOMAIN/s: Nitrilase/cyanide hydratase and apolipoprotein N-acyltransferase (InterPro:IPR003010), Nitrilase/cyanide hydratase, conserved site (InterPro:IPR000132); BEST Arabidop…	.			1.46754	-4.2358	-1.39601		1.50397
		AT1G70260		nodulin MtN21 /EamA-like transporter family protein nodulin MtN21 /EamA-like transporter family protein; FUNCTIONS IN: molecular_function unknown; LOCATED IN: endomembrane system, membrane; CONTAINS InterPro DOMAIN/s: Protein of unknown function DUF6, transmembrane (InterPro:IPR000620); BEST Arabidopsis thaliana protein match is: Nodulin MtN21 /EamA-like transporter family protein (TAIR:AT1G60050…	.			1.18004			4.28503		-1.12652				1.94522		1.5518
		AT4G28040		nodulin MtN21 /EamA-like transporter family protein nodulin MtN21 /EamA-like transporter family protein; LOCATED IN: endomembrane system, membrane; EXPRESSED IN: 6 plant structures; EXPRESSED DURING: 4 anthesis, petal differentiation and expansion stage; CONTAINS InterPro DOMAIN/s: Protein of unknown function DUF6, transmembrane (InterPro:IPR000620); BEST Arabidopsis thaliana protein match is: no…	.					-1.25907	-1.14284		-1.34783				1.4333
		AT1G33030		O-methyltransferase family protein O-methyltransferase family protein; CONTAINS InterPro DOMAIN/s: Winged helix-turn-helix transcription repressor DNA-binding (InterPro:IPR011991), Plant methyltransferase dimerisation (InterPro:IPR012967), O-methyltransferase, family 2 (InterPro:IPR001077), O-methyltransferase, COMT, eukaryota (InterPro:IPR016461); BEST Arabidopsis thaliana protein match is: O-me…	.			1.27769		-1.30219	1.77097
		AT4G25860		OSBP(oxysterol binding protein)-related protein 4A OSBP(oxysterol binding protein)-related protein 4A (ORP4A); FUNCTIONS IN: oxysterol binding; INVOLVED IN: steroid metabolic process; LOCATED IN: cellular_component unknown; CONTAINS InterPro DOMAIN/s: Oxysterol-binding protein (InterPro:IPR000648); BEST Arabidopsis thaliana protein match is: OSBP(oxysterol binding protein)-related protein 4B (TAI…	.			1.9965			2.48688
		AT4G11650	OSM34	osmotin 34 osmotin-like protein osmotin 34 (OSM34); INVOLVED IN: defense response to fungus, incompatible interaction, response to salt stress, defense response to bacterium, incompatible interaction, response to other organism; LOCATED IN: endomembrane system; EXPRESSED IN: 6 plant structures; EXPRESSED DURING: 4 anthesis; CONTAINS InterPro DOMAIN/s: Thaumatin, conserved site (InterPro:IPR017949…	.			1.58777			1.8205
		AT5G56550	OXS3	oxidative stress 3 Encodes OXIDATIVE STRESS 3 (OXS3)&#65292; involved in tolerance to heavy metals and oxidative stress. OXIDATIVE STRESS 3 (OXS3); BEST Arabidopsis thaliana protein match is: unknown protein (TAIR:AT4G26288.1); Has 1807 Blast hits to 1807 proteins in 277 species: Archae - 0; Bacteria - 0; Metazoa - 736; Fungi - 347; Plants - 385; Viruses - 0; Other Eukaryotes - 339 (source: NCBI …	.			-1.47698			-1.31011
		AT5G52390	PAR1	PAR1 protein PAR1 protein; FUNCTIONS IN: molecular_function unknown; INVOLVED IN: biological_process unknown; LOCATED IN: endomembrane system; EXPRESSED IN: 13 plant structures; EXPRESSED DURING: 8 growth stages; CONTAINS InterPro DOMAIN/s: PAR1 (InterPro:IPR009489); BEST Arabidopsis thaliana protein match is: PAR1 protein (TAIR:AT3G54040.1); Has 1807 Blast hits to 1807 proteins in 277 species: A…	.				-1.55562			-1.15757							-1.74347
		AT1G11920		Pectin lyase-like superfamily protein Pectin lyase-like superfamily protein; FUNCTIONS IN: lyase activity, pectate lyase activity; INVOLVED IN: biological_process unknown; LOCATED IN: endomembrane system; EXPRESSED IN: flower; EXPRESSED DURING: petal differentiation and expansion stage; CONTAINS InterPro DOMAIN/s: Pectin lyase fold/virulence factor (InterPro:IPR011050), AmbAllergen (InterPro:IPR0…	.			1.10129					-1.34981
		AT4G33220	PME44	pectin methylesterase 44 pectin methylesterase 44 (PME44); FUNCTIONS IN: enzyme inhibitor activity, pectinesterase activity; INVOLVED IN: cell wall modification; LOCATED IN: endomembrane system, cell wall, plant-type cell wall; EXPRESSED IN: 22 plant structures; EXPRESSED DURING: 13 growth stages; CONTAINS InterPro DOMAIN/s: Pectinesterase, active site (InterPro:IPR018040), Pectin lyase fold/viru…	.			1.40139			1.90259
		AT5G06720	PA2	peroxidase 2 peroxidase 2 (PA2); FUNCTIONS IN: peroxidase activity, heme binding; INVOLVED IN: oxidation reduction, response to oxidative stress; LOCATED IN: endomembrane system; EXPRESSED IN: 21 plant structures; EXPRESSED DURING: 11 growth stages; CONTAINS InterPro DOMAIN/s: Haem peroxidase (InterPro:IPR010255), Plant peroxidase (InterPro:IPR000823), Peroxidases heam-ligand binding site (InterP…	.			1.09517			1.98121						1.70966
		AT4G08780		Peroxidase superfamily protein Peroxidase superfamily protein; FUNCTIONS IN: peroxidase activity, heme binding; INVOLVED IN: oxidation reduction, response to oxidative stress; LOCATED IN: vacuole; EXPRESSED IN: embryo, hypocotyl, root, flower, seed; EXPRESSED DURING: F mature embryo stage, petal differentiation and expansion stage, E expanded cotyledon stage, D bilateral stage; CONTAINS InterPro …	.			1.09412			1.35551	1.11114
		AT5G64110		Peroxidase superfamily protein Peroxidase superfamily protein; FUNCTIONS IN: peroxidase activity, heme binding; INVOLVED IN: response to oxidative stress, oxidation reduction; LOCATED IN: membrane; EXPRESSED IN: shoot apex, shoot, stamen, leaf; EXPRESSED DURING: 4 anthesis; CONTAINS InterPro DOMAIN/s: Haem peroxidase (InterPro:IPR010255), Plant peroxidase (InterPro:IPR000823), Peroxidases heam-li…	.			1.22454			1.58591	1.03336					-1.43651	-1.47739
		AT5G06730		Peroxidase superfamily protein Peroxidase superfamily protein; FUNCTIONS IN: peroxidase activity, heme binding; INVOLVED IN: response to oxidative stress, oxidation reduction; LOCATED IN: plasma membrane; EXPRESSED IN: root, cultured cell; CONTAINS InterPro DOMAIN/s: Haem peroxidase (InterPro:IPR010255), Plant peroxidase (InterPro:IPR000823), Peroxidases heam-ligand binding site (InterPro:IPR0197…	.			1.32215			1.56156
		AT5G05340		Peroxidase superfamily protein Peroxidase superfamily protein; FUNCTIONS IN: protein binding, peroxidase activity; INVOLVED IN: response to oxidative stress, oxidation reduction; LOCATED IN: apoplast, cell wall; EXPRESSED IN: 9 plant structures; EXPRESSED DURING: LP.04 four leaves visible, 4 anthesis, C globular stage, petal differentiation and expansion stage; CONTAINS InterPro DOMAIN/s: Haem pe…	.				-1.37829		2.88708
		AT1G28010	PGP14	P-glycoprotein 14 P-glycoprotein 14 (PGP14); FUNCTIONS IN: ATPase activity, coupled to transmembrane movement of substances; INVOLVED IN: transport, transmembrane transport; LOCATED IN: integral to membrane; EXPRESSED IN: 9 plant structures; EXPRESSED DURING: LP.04 four leaves visible, LP.02 two leaves visible, LP.12 twelve leaves visible; CONTAINS InterPro DOMAIN/s: ATPase, AAA+ type, core (Inte…	.			1.92277		1.28115	1.70069						-1.13637
		AT1G56250	PP2-B14	phloem protein 2-B14 phloem protein 2-B14 (PP2-B14); FUNCTIONS IN: carbohydrate binding; LOCATED IN: endomembrane system; CONTAINS InterPro DOMAIN/s: F-box domain, cyclin-like (InterPro:IPR001810); BEST Arabidopsis thaliana protein match is: phloem protein 2-B13 (TAIR:AT1G56240.1); Has 533 Blast hits to 518 proteins in 36 species: Archae - 0; Bacteria - 0; Metazoa - 0; Fungi - 0; Plants - 533; Vi…	.			-1.1446		-1.5199		1.38837	-1.54829
		AT2G02250	PP2-B2	phloem protein 2-B2 phloem protein 2-B2 (PP2-B2); FUNCTIONS IN: carbohydrate binding; INVOLVED IN: N-terminal protein myristoylation; LOCATED IN: cellular_component unknown; EXPRESSED IN: stamen; EXPRESSED DURING: 4 anthesis; CONTAINS InterPro DOMAIN/s: F-box domain, cyclin-like (InterPro:IPR001810), F-box domain, Skp2-like (InterPro:IPR022364); BEST Arabidopsis thaliana protein match is: F-box f…	.					-1.26274			-1.1073
		AT3G14940	PPC3	phosphoenolpyruvate carboxylase 3 Encodes a cytosolic phosphoenolpyruvate carboxylase (PEPC) that has activity when expressed in E.coli. Its mRNA is most abundantly expressed in roots and siliques. PPC3 belongs to the plant-type PEPC family. It can form an enzymatically active complex with a castor bean ortholog of PPC4, which encodes a bacterial-type PEPC. phosphoenolpyruvate carboxylase 3 (PPC3…	.			1.37195			1.70253						1.20093
		AT3G60420		Phosphoglycerate mutase family protein Phosphoglycerate mutase family protein; LOCATED IN: cellular_component unknown; EXPRESSED IN: 17 plant structures; EXPRESSED DURING: 10 growth stages; CONTAINS InterPro DOMAIN/s: Histidine phosphatase superfamily, clade-1 (InterPro:IPR013078), PRIB5 (InterPro:IPR012398); BEST Arabidopsis thaliana protein match is: Phosphoglycerate mutase family protein (TAIR…	.					-2.57437	2.45346	1.76414
		AT2G26560	PLA2A	phospholipase A 2A Encodes a lipid acyl hydrolase with wide substrate specificity that accumulates upon infection by fungal and bacterial pathogens. Protein is localized in the cytoplasm in healthy leaves, and in membranes in infected cells. Plays a role in cell death and differentially affects the accumulation of oxylipins. Contributes to resistance to virus. phospholipase A 2A (PLA2A); FUNCTION…	.			1.1512		-1.15943	1.24324	1.15681					1.41553
		AT2G34420	LHB1B2	photosystem II light harvesting complex gene B1B2 Photosystem II type I chlorophyll a/b-binding protein photosystem II light harvesting complex gene B1B2 (LHB1B2); FUNCTIONS IN: chlorophyll binding; INVOLVED IN: photosynthesis, light harvesting in photosystem II, photosynthesis; LOCATED IN: in 7 components; EXPRESSED IN: cotyledon, guard cell, juvenile leaf, cultured cell, leaf; EXPRESSED DURING:…	.			-1.16754			1.10681
		AT3G47380		Plant invertase/pectin methylesterase inhibitor superfamily protein Plant invertase/pectin methylesterase inhibitor superfamily protein; FUNCTIONS IN: enzyme inhibitor activity, pectinesterase inhibitor activity, pectinesterase activity; INVOLVED IN: biological_process unknown; LOCATED IN: endomembrane system; EXPRESSED IN: 14 plant structures; EXPRESSED DURING: 9 growth stages; CONTAINS InterPro…	.					-2.06237		1.19691
		AT3G60470	DUF247	Plant protein of unknown function (DUF247) Plant protein of unknown function (DUF247); CONTAINS InterPro DOMAIN/s: Protein of unknown function DUF247, plant (InterPro:IPR004158); BEST Arabidopsis thaliana protein match is: Plant protein of unknown function (DUF247) (TAIR:AT2G28580.1); Has 1401 Blast hits to 907 proteins in 17 species: Archae - 0; Bacteria - 0; Metazoa - 0; Fungi - 0; Plants - 140…	.			-1.04972		-1.44166			-1.661				2.41894
		AT1G66950	PDR11	pleiotropic drug resistance 11 pleiotropic drug resistance 11 (PDR11); FUNCTIONS IN: ATPase activity, coupled to transmembrane movement of substances; INVOLVED IN: drug transmembrane transport; LOCATED IN: membrane; EXPRESSED IN: 9 plant structures; EXPRESSED DURING: 4 anthesis, C globular stage, petal differentiation and expansion stage; CONTAINS InterPro DOMAIN/s: ATPase, AAA+ type, core (Inter…	.			3.02076			2.54161
		AT3G26960		Pollen Ole e 1 allergen and extensin family protein Pollen Ole e 1 allergen and extensin family protein; FUNCTIONS IN: molecular_function unknown; INVOLVED IN: biological_process unknown; LOCATED IN: endomembrane system; EXPRESSED IN: 21 plant structures; EXPRESSED DURING: 13 growth stages; CONTAINS InterPro DOMAIN/s: Pollen Ole e 1 allergen/extensin (InterPro:IPR006041); BEST Arabidopsis thalian…	.			-2.3221				-1.19963
		AT2G16630		Pollen Ole e 1 allergen and extensin family protein Pollen Ole e 1 allergen and extensin family protein; LOCATED IN: endomembrane system; EXPRESSED IN: 21 plant structures; EXPRESSED DURING: 13 growth stages; CONTAINS InterPro DOMAIN/s: Pollen Ole e 1 allergen/extensin (InterPro:IPR006041); Has 30201 Blast hits to 17322 proteins in 780 species: Archae - 12; Bacteria - 1396; Metazoa - 17338; Fungi…	.			1.85011			3.15985
		AT1G70880		Polyketide cyclase/dehydrase and lipid transport superfamily protein Polyketide cyclase/dehydrase and lipid transport superfamily protein; FUNCTIONS IN: molecular_function unknown; INVOLVED IN: response to biotic stimulus, defense response; LOCATED IN: cellular_component unknown; EXPRESSED IN: root; CONTAINS InterPro DOMAIN/s: Bet v I allergen (InterPro:IPR000916); BEST Arabidopsis thaliana prote…	.			-1.38426		-1.26942	-1.35962
		AT4G13390		Proline-rich extensin-like family protein Proline-rich extensin-like family protein; FUNCTIONS IN: structural constituent of cell wall; INVOLVED IN: plant-type cell wall organization; LOCATED IN: endomembrane system; CONTAINS InterPro DOMAIN/s: Extensin-like repeat (InterPro:IPR006706); BEST Arabidopsis thaliana protein match is: Proline-rich extensin-like family protein (TAIR:AT5G06640.1); Has 1…	.			1.31433					-1.49473
		AT5G35190		proline-rich extensin-like family protein proline-rich extensin-like family protein; FUNCTIONS IN: structural constituent of cell wall; INVOLVED IN: plant-type cell wall organization; LOCATED IN: endomembrane system; EXPRESSED IN: root; CONTAINS InterPro DOMAIN/s: Extensin-like repeat (InterPro:IPR006706); BEST Arabidopsis thaliana protein match is: Proline-rich extensin-like family protein (TAIR…	.			1.56505				1.05159
		AT1G67000		Protein kinase superfamily protein Protein kinase superfamily protein; FUNCTIONS IN: protein serine/threonine kinase activity, protein kinase activity, kinase activity, ATP binding; INVOLVED IN: protein amino acid phosphorylation; LOCATED IN: endomembrane system; EXPRESSED IN: stem; CONTAINS InterPro DOMAIN/s: Protein kinase, ATP binding site (InterPro:IPR017441), Protein kinase, catalytic domain…	.			1.27222			1.71455
		AT3G60700	DUF1163	Protein of unknown function (DUF1163) Protein of unknown function (DUF1163); CONTAINS InterPro DOMAIN/s: Protein of unknown function DUF1163 (InterPro:IPR009544); BEST Arabidopsis thaliana protein match is: Protein of unknown function (DUF1163) (TAIR:AT1G70040.1); Has 41 Blast hits to 41 proteins in 2 species: Archae - 0; Bacteria - 0; Metazoa - 0; Fungi - 0; Plants - 41; Viruses - 0; Other Eukar…	.			-1.69724			-1.70612
		AT5G48575	DUF1216	Protein of unknown function (DUF1216) Protein of unknown function (DUF1216); CONTAINS InterPro DOMAIN/s: Protein of unknown function DUF1216 (InterPro:IPR009605); BEST Arabidopsis thaliana protein match is: Protein of unknown function (DUF1216) (TAIR:AT3G28810.1); Has 30 Blast hits to 30 proteins in 3 species: Archae - 0; Bacteria - 0; Metazoa - 0; Fungi - 0; Plants - 30; Viruses - 0; Other Eukar…	.			-1.60939					1.39625
		AT5G67370	DUF1230	Protein of unknown function (DUF1230) Protein of unknown function (DUF1230); CONTAINS InterPro DOMAIN/s: Protein of unknown function DUF1230 (InterPro:IPR009631); BEST Arabidopsis thaliana protein match is: Protein of unknown function (DUF1230) (TAIR:AT5G11840.1); Has 1807 Blast hits to 1807 proteins in 277 species: Archae - 0; Bacteria - 0; Metazoa - 736; Fungi - 347; Plants - 385; Viruses - 0; …	.			2.07585			4.70042						2.46134
		AT5G15120	DUF1637	Protein of unknown function (DUF1637) Protein of unknown function (DUF1637); FUNCTIONS IN: cysteamine dioxygenase activity; INVOLVED IN: anaerobic respiration; LOCATED IN: cellular_component unknown; EXPRESSED IN: 20 plant structures; EXPRESSED DURING: 8 growth stages; CONTAINS InterPro DOMAIN/s: Protein of unknown function DUF1637 (InterPro:IPR012864); BEST Arabidopsis thaliana protein match is:…	.					2.14332	2.29745						1.21938
		AT5G39890	DUF1637	Protein of unknown function (DUF1637) Protein of unknown function (DUF1637); FUNCTIONS IN: cysteamine dioxygenase activity; INVOLVED IN: oxidation reduction; LOCATED IN: cellular_component unknown; EXPRESSED IN: 24 plant structures; EXPRESSED DURING: 15 growth stages; CONTAINS InterPro DOMAIN/s: Protein of unknown function DUF1637 (InterPro:IPR012864); BEST Arabidopsis thaliana protein match is: …	.			1.04663		2.63366	3.37943	1.44887
		AT5G39520	DUF1997	Protein of unknown function (DUF1997) Protein of unknown function (DUF1997); FUNCTIONS IN: molecular_function unknown; INVOLVED IN: biological_process unknown; LOCATED IN: chloroplast; EXPRESSED IN: 9 plant structures; EXPRESSED DURING: LP.06 six leaves visible, LP.04 four leaves visible, 4 anthesis, 4 leaf senescence stage, petal differentiation and expansion stage; CONTAINS InterPro DOMAIN/s: P…	.			1.73439	-5.383	-2.06272	2.73884						-1.64195	-1.42781	-2.82627
		AT1G20180	DUF677	Protein of unknown function (DUF677) Protein of unknown function (DUF677); FUNCTIONS IN: molecular_function unknown; INVOLVED IN: biological_process unknown; EXPRESSED IN: 8 plant structures; EXPRESSED DURING: 4 anthesis, C globular stage, petal differentiation and expansion stage; CONTAINS InterPro DOMAIN/s: Protein of unknown function DUF677 (InterPro:IPR007749); BEST Arabidopsis thaliana prote…	.			2.20249			3.20172					-5.70305
		AT4G32950		Protein phosphatase 2C family protein Protein phosphatase 2C family protein; FUNCTIONS IN: protein serine/threonine phosphatase activity, catalytic activity; INVOLVED IN: biological_process unknown; LOCATED IN: cellular_component unknown; EXPRESSED IN: 6 plant structures; EXPRESSED DURING: 4 anthesis, petal differentiation and expansion stage, E expanded cotyledon stage; CONTAINS InterPro DOMAIN/…	.			2.77741			4.9333
		AT2G42840	PDF1	protodermal factor 1 Encodes a putative extracellular proline-rich protein is exclusively expressed in the L1 layer of vegetative, inflorescence and floral meristems and the protoderm of organ primordia. protodermal factor 1 (PDF1); Has 74620 Blast hits to 36810 proteins in 1713 species: Archae - 153; Bacteria - 12776; Metazoa - 27126; Fungi - 11565; Plants - 10582; Viruses - 2385; Other Eukaryot…	.			1.53788			2.26119
		AT4G04890	PDF2	protodermal factor 2 Encodes a homeodomain protein that is expressed in the LI layer of the vegetative, floral and inflorescence meristems. Binds to the L1 box promoter element which is required in some proteins for L1 specific expression. protodermal factor 2 (PDF2); FUNCTIONS IN: DNA binding, sequence-specific DNA binding transcription factor activity; INVOLVED IN: epidermal cell differentiatio…	.			1.52254			1.96206
		AT1G47603	PUP19	purine permease 19 Member of a family of proteins related to PUP1, a purine transporter. May be involved in the transport of purine and purine derivatives such as cytokinins, across the plasma membrane. purine permease 19 (PUP19); CONTAINS InterPro DOMAIN/s: Protein of unknown function DUF250 (InterPro:IPR004853); BEST Arabidopsis thaliana protein match is: purine permease 17 (TAIR:AT1G57943.1); …	.					-1.33998	-1.84739
		AT2G26040		PYR1-like 2 Encodes a member of the PYR (pyrabactin resistance )/PYL(PYR1-like)/RCAR (regulatory components of ABA receptor) family proteins with 14 members. PYR/PYL/RCAR family proteins function as abscisic acid sensors. Mediate ABA-dependent regulation of protein phosphatase 2Cs ABI1 and ABI2. PYR1-like 2 (PYL2); CONTAINS InterPro DOMAIN/s: Polyketide cyclase/dehydrase (InterPro:IPR019587); BES…	.			2.06773		2.31388	2.78498
		AT3G08860	PYD4	PYRIMIDINE 4 Encodes a protein that is predicted to have beta-alanine aminotransferase activity. PYRIMIDINE 4 (PYD4); FUNCTIONS IN: pyridoxal phosphate binding, transaminase activity, catalytic activity, alanine-glyoxylate transaminase activity; INVOLVED IN: cellular response to nitrogen levels; LOCATED IN: mitochondrion; EXPRESSED IN: 14 plant structures; EXPRESSED DURING: LP.06 six leaves visib…	.				-2.27397	-1.35245	2.0004								-2.03726
		AT4G14020		Rapid alkalinization factor (RALF) family protein Rapid alkalinization factor (RALF) family protein; CONTAINS InterPro DOMAIN/s: Rapid ALkalinization Factor (InterPro:IPR008801); Has 30201 Blast hits to 17322 proteins in 780 species: Archae - 12; Bacteria - 1396; Metazoa - 17338; Fungi - 3422; Plants - 5037; Viruses - 0; Other Eukaryotes - 2996 (source: NCBI BLink). |	.			1.33067			2.36871						1.25542
		AT2G32660	RLP22	receptor like protein 22 receptor like protein 22 (RLP22); CONTAINS InterPro DOMAIN/s: Leucine-rich repeat (InterPro:IPR001611); BEST Arabidopsis thaliana protein match is: receptor like protein 27 (TAIR:AT2G33060.1); Has 72946 Blast hits to 23279 proteins in 925 species: Archae - 37; Bacteria - 3607; Metazoa - 12485; Fungi - 751; Plants - 51027; Viruses - 14; Other Eukaryotes - 5025 (source: NCB…	.			1.22592			1.5283
		AT5G41280		Receptor-like protein kinase-related family protein Receptor-like protein kinase-related family protein; FUNCTIONS IN: molecular_function unknown; INVOLVED IN: biological_process unknown; LOCATED IN: anchored to plasma membrane, anchored to membrane; EXPRESSED IN: hypocotyl, root, callus; CONTAINS InterPro DOMAIN/s: Protein of unknown function DUF26 (InterPro:IPR002902); BEST Arabidopsis thaliana…	.					-1.33188			-1.17225
		AT5G41290		Receptor-like protein kinase-related family protein Receptor-like protein kinase-related family protein; INVOLVED IN: biological_process unknown; LOCATED IN: anchored to plasma membrane, anchored to membrane; EXPRESSED IN: callus; CONTAINS InterPro DOMAIN/s: Protein of unknown function DUF26 (InterPro:IPR002902); BEST Arabidopsis thaliana protein match is: Receptor-like protein kinase-related fam…	.					-1.06984			-1.30821
		AT5G13330		related to AP2 6l encodes a member of the ERF (ethylene response factor) subfamily B-4 of ERF/AP2 transcription factor family. The protein contains one AP2 domain. There are 7 members in this subfamily. related to AP2 6l (Rap2.6L); FUNCTIONS IN: DNA binding, sequence-specific DNA binding transcription factor activity; INVOLVED IN: regulation of transcription, DNA-dependent; LOCATED IN: nucleus; E…	.			1.09241			1.38962		-1.04382
		AT5G39120		RmlC-like cupins superfamily protein RmlC-like cupins superfamily protein; FUNCTIONS IN: manganese ion binding, nutrient reservoir activity; INVOLVED IN: biological_process unknown; LOCATED IN: endomembrane system, apoplast; CONTAINS InterPro DOMAIN/s: Cupin, RmlC-type (InterPro:IPR011051), Cupin 1 (InterPro:IPR006045), RmlC-like jelly roll fold (InterPro:IPR014710), Germin (InterPro:IPR001929), …	.			1.30532			2.3122
		AT5G38910		RmlC-like cupins superfamily protein RmlC-like cupins superfamily protein; FUNCTIONS IN: manganese ion binding, nutrient reservoir activity; INVOLVED IN: biological_process unknown; LOCATED IN: endomembrane system, apoplast; CONTAINS InterPro DOMAIN/s: Cupin, RmlC-type (InterPro:IPR011051), Cupin 1 (InterPro:IPR006045), RmlC-like jelly roll fold (InterPro:IPR014710), Germin (InterPro:IPR001929), …	.			1.13979	1.58778	-3.03647	1.95464	1.18258	-2.05526
		AT5G39180		RmlC-like cupins superfamily protein RmlC-like cupins superfamily protein; FUNCTIONS IN: manganese ion binding, nutrient reservoir activity; INVOLVED IN: biological_process unknown; LOCATED IN: endomembrane system, apoplast; CONTAINS InterPro DOMAIN/s: Cupin, RmlC-type (InterPro:IPR011051), Cupin 1 (InterPro:IPR006045), RmlC-like jelly roll fold (InterPro:IPR014710), Germin (InterPro:IPR001929), …	.			1.25104			2.72369
		AT5G39130		RmlC-like cupins superfamily protein RmlC-like cupins superfamily protein; FUNCTIONS IN: manganese ion binding, nutrient reservoir activity; INVOLVED IN: biological_process unknown; LOCATED IN: endomembrane system, apoplast; CONTAINS InterPro DOMAIN/s: Cupin, RmlC-type (InterPro:IPR011051), Cupin 1 (InterPro:IPR006045), RmlC-like jelly roll fold (InterPro:IPR014710), Germin (InterPro:IPR001929), …	.			1.74823	1.53212		2.30252						5.69625
		AT5G39160		RmlC-like cupins superfamily protein RmlC-like cupins superfamily protein; FUNCTIONS IN: manganese ion binding, nutrient reservoir activity; INVOLVED IN: biological_process unknown; LOCATED IN: endomembrane system, apoplast; CONTAINS InterPro DOMAIN/s: Cupin, RmlC-type (InterPro:IPR011051), Cupin 1 (InterPro:IPR006045), Germin (InterPro:IPR001929), RmlC-like jelly roll fold (InterPro:IPR014710), …	.			2.06165			2.66136
		AT1G66700	PXMT1	S-adenosyl-L-methionine-dependent methyltransferases superfamily protein A member of the Arabidopsis SABATH methyltransferase gene family. Encodes PXMT1, a methyltransferase that methylates 1,7-paraxanthine. PXMT1; CONTAINS InterPro DOMAIN/s: SAM dependent carboxyl methyltransferase (InterPro:IPR005299); BEST Arabidopsis thaliana protein match is: S-adenosyl-L-methionine-dependent methyltransfera…	.			2.08662		-1.05552	2.80073	1.27549							2.23154
		AT2G43920	HOL2	S-adenosyl-L-methionine-dependent methyltransferases superfamily protein HARMLESS TO OZONE LAYER 2 (HOL2); FUNCTIONS IN: methyltransferase activity, thiopurine S-methyltransferase activity; INVOLVED IN: metabolic process; LOCATED IN: cytoplasm; CONTAINS InterPro DOMAIN/s: Thiopurine S-methyltransferase (InterPro:IPR008854); BEST Arabidopsis thaliana protein match is: HARMLESS TO OZONE LAYER 1 (TA…	.					-1.61614	-1.81295		-1.99302
		AT1G15125		S-adenosyl-L-methionine-dependent methyltransferases superfamily protein S-adenosyl-L-methionine-dependent methyltransferases superfamily protein; FUNCTIONS IN: S-adenosylmethionine-dependent methyltransferase activity, methyltransferase activity; INVOLVED IN: biological_process unknown; LOCATED IN: cellular_component unknown; CONTAINS InterPro DOMAIN/s: SAM dependent carboxyl methyltransferase (…	.			1.96197		-1.16018		1.60356			-1.07587
		AT3G10040		sequence-specific DNA binding transcription factors sequence-specific DNA binding transcription factors; BEST Arabidopsis thaliana protein match is: unknown protein (TAIR:AT1G76870.1); Has 3136 Blast hits to 1955 proteins in 249 species: Archae - 4; Bacteria - 147; Metazoa - 846; Fungi - 267; Plants - 330; Viruses - 57; Other Eukaryotes - 1485 (source: NCBI BLink). |	.					2.56426	2.42382
		AT3G12230	SCPL14	serine carboxypeptidase-like 14 serine carboxypeptidase-like 14 (scpl14); FUNCTIONS IN: serine-type carboxypeptidase activity; INVOLVED IN: proteolysis; LOCATED IN: endomembrane system; CONTAINS InterPro DOMAIN/s: Peptidase S10, serine carboxypeptidase (InterPro:IPR001563); BEST Arabidopsis thaliana protein match is: serine carboxypeptidase-like 15 (TAIR:AT3G12240.1); Has 3660 Blast hits to 3566 …	.			-1.57294		-2.57132			-2.39265
		AT1G61130	SCPL32	serine carboxypeptidase-like 32 serine carboxypeptidase-like 32 (SCPL32); FUNCTIONS IN: serine-type carboxypeptidase activity; INVOLVED IN: proteolysis; LOCATED IN: endomembrane system; EXPRESSED IN: male gametophyte, root, flower; EXPRESSED DURING: 4 anthesis; CONTAINS InterPro DOMAIN/s: Peptidase S10, serine carboxypeptidase (InterPro:IPR001563), Peptidase S10, serine carboxypeptidase, active s…	.			2.4676					2.42612
		AT3G17180	SCPL33	serine carboxypeptidase-like 33 serine carboxypeptidase-like 33 (scpl33); FUNCTIONS IN: serine-type carboxypeptidase activity; INVOLVED IN: proteolysis; LOCATED IN: endomembrane system; EXPRESSED IN: shoot apex, root, flower, stamen; EXPRESSED DURING: 4 anthesis, petal differentiation and expansion stage; CONTAINS InterPro DOMAIN/s: Peptidase S10, serine carboxypeptidase (InterPro:IPR001563), Pep…	.			-1.6378					1.03541
		AT1G73290	SCPL5	serine carboxypeptidase-like 5 serine carboxypeptidase-like 5 (scpl5); FUNCTIONS IN: serine-type carboxypeptidase activity; INVOLVED IN: proteolysis; LOCATED IN: endomembrane system; EXPRESSED IN: hypocotyl, root; CONTAINS InterPro DOMAIN/s: Peptidase S10, serine carboxypeptidase (InterPro:IPR001563); BEST Arabidopsis thaliana protein match is: serine carboxypeptidase-like 3 (TAIR:AT1G73280.1); H…	.			-1.82136					1.13233
		AT5G43570		Serine protease inhibitor, potato inhibitor I-type family protein Predicted to encode a PR (pathogenesis-related) peptide that belongs to the PR-6 proteinase inhibitor family. Six putative PR-6-type protein encoding genes are found in Arabidopsis: At2g38900, At2g38870, At5g43570, At5g43580, At3g50020 and At3g46860. Serine protease inhibitor, potato inhibitor I-type family protein; FUNCTIONS IN: s…	.			2.54217	-5.50166		2.28408
		AT5G25260		SPFH/Band 7/PHB domain-containing membrane-associated protein family SPFH/Band 7/PHB domain-containing membrane-associated protein family; FUNCTIONS IN: molecular_function unknown; INVOLVED IN: biological_process unknown; LOCATED IN: plasma membrane; EXPRESSED IN: cultured cell; CONTAINS InterPro DOMAIN/s: Band 7 protein (InterPro:IPR001107); BEST Arabidopsis thaliana protein match is: SPFH/Band …	.					-1.19146	1.36372	1.22164
		AT5G24160	SQE6	squalene monoxygenase 6 squalene monoxygenase 6 (SQE6); FUNCTIONS IN: squalene monooxygenase activity, oxidoreductase activity, FAD binding; INVOLVED IN: sterol biosynthetic process; LOCATED IN: endomembrane system, integral to membrane; EXPRESSED IN: 12 plant structures; EXPRESSED DURING: 9 growth stages; CONTAINS InterPro DOMAIN/s: Squalene epoxidase (InterPro:IPR013698), FAD dependent oxidored…	.			4.43726			4.44567
		AT5G51750	SBT1.3	subtilase 1.3 subtilase 1.3 (SBT1.3); FUNCTIONS IN: identical protein binding, serine-type endopeptidase activity; INVOLVED IN: proteolysis, negative regulation of catalytic activity; LOCATED IN: apoplast; EXPRESSED IN: 26 plant structures; EXPRESSED DURING: 13 growth stages; CONTAINS InterPro DOMAIN/s: Protease-associated PA (InterPro:IPR003137), Proteinase inhibitor, propeptide (InterPro:IPR009…	.			1.74031		1.12259	3.78933
		AT1G32960	SBT3.3	Subtilase family protein SBT3.3; FUNCTIONS IN: identical protein binding, serine-type endopeptidase activity; INVOLVED IN: proteolysis, negative regulation of catalytic activity; LOCATED IN: apoplast, plant-type cell wall; EXPRESSED IN: 7 plant structures; EXPRESSED DURING: 4 anthesis; CONTAINS InterPro DOMAIN/s: Protease-associated PA (InterPro:IPR003137), Proteinase inhibitor, propeptide (Inter…	.			1.92271					-1.80217
		AT4G02280	SUS3	sucrose synthase 3 Encodes a protein with sucrose synthase activity (SUS3). It appears to be important for sucrose metabolism in developing seeds, especially during the late maturation phase, about 18 days after flowering. sucrose synthase 3 (SUS3); CONTAINS InterPro DOMAIN/s: Sucrose synthase, plant/cyanobacteria (InterPro:IPR012820), Sucrose synthase (InterPro:IPR000368), Glycosyl transferase, …	.				-3.53041		1.45915						-1.50974		-1.67815
		AT2G18260	SYP112	syntaxin of plants 112 member of SYP11 Gene Family syntaxin of plants 112 (SYP112); FUNCTIONS IN: SNAP receptor activity; INVOLVED IN: intracellular protein transport, response to cold, cellular membrane fusion; LOCATED IN: nucleus; EXPRESSED IN: sperm cell, flower; EXPRESSED DURING: petal differentiation and expansion stage; CONTAINS InterPro DOMAIN/s: Target SNARE coiled-coil domain (InterPro:I…	.			-1.72214			-2.30427
		AT4G13300	TPS13	terpenoid synthase 13 Catalyzes the conversion of farnesyl diphosphate to (Z)-gamma-bisabolene and the additional minor products E-nerolidol and alpha-bisabolol. Expressed in cortex and sub-epidermal layers of roots, leaf hydathodes and flower stigmata. Induced by wounding. terpenoid synthase 13 (TPS13); CONTAINS InterPro DOMAIN/s: Terpene synthase, metal-binding domain (InterPro:IPR005630), Terp…	.					-1.19619	-1.15453
		AT5G38900		Thioredoxin superfamily protein Thioredoxin superfamily protein; FUNCTIONS IN: protein disulfide oxidoreductase activity; INVOLVED IN: defense response to fungus, incompatible interaction; LOCATED IN: cellular_component unknown; EXPRESSED IN: 16 plant structures; EXPRESSED DURING: 10 growth stages; CONTAINS InterPro DOMAIN/s: DSBA oxidoreductase (InterPro:IPR001853), Thioredoxin-like fold (InterP…	.					-1.17035	1.48485
		AT1G57630		Toll-Interleukin-Resistance (TIR) domain family protein Toll-Interleukin-Resistance (TIR) domain family protein; FUNCTIONS IN: transmembrane receptor activity; INVOLVED IN: signal transduction, defense response, innate immune response; LOCATED IN: intrinsic to membrane; EXPRESSED IN: 7 plant structures; EXPRESSED DURING: 9 growth stages; CONTAINS InterPro DOMAIN/s: Toll-Interleukin receptor (Inte…	.					-1.14901	1.92373	1.0818
		AT4G19925		Toll-Interleukin-Resistance (TIR) domain family protein Toll-Interleukin-Resistance (TIR) domain family protein; FUNCTIONS IN: transmembrane receptor activity; INVOLVED IN: signal transduction, defense response, innate immune response; LOCATED IN: membrane; CONTAINS InterPro DOMAIN/s: Toll-Interleukin receptor (InterPro:IPR000157); BEST Arabidopsis thaliana protein match is: Toll-Interleukin-Resi…	.					-1.74626	1.7155
		AT3G46190		TRAF-like family protein TRAF-like family protein; CONTAINS InterPro DOMAIN/s: TRAF-like (InterPro:IPR008974), MATH (InterPro:IPR002083), TRAF-type (InterPro:IPR013322); BEST Arabidopsis thaliana protein match is: TRAF-like family protein (TAIR:AT1G58270.1); Has 980 Blast hits to 953 proteins in 88 species: Archae - 0; Bacteria - 0; Metazoa - 314; Fungi - 12; Plants - 614; Viruses - 0; Other Euka…	.			-1.40497		-2.38772	-1.40871		-1.20296
		AT4G01390		TRAF-like family protein TRAF-like family protein; CONTAINS InterPro DOMAIN/s: TRAF-like (InterPro:IPR008974), MATH (InterPro:IPR002083); BEST Arabidopsis thaliana protein match is: TRAF-like family protein (TAIR:AT4G00780.1); Has 30201 Blast hits to 17322 proteins in 780 species: Archae - 12; Bacteria - 1396; Metazoa - 17338; Fungi - 3422; Plants - 5037; Viruses - 0; Other Eukaryotes - 2996 (sou…	.			2.01774			1.87817						2.51812
		AT2G32140		transmembrane receptors transmembrane receptors; FUNCTIONS IN: transmembrane receptor activity; INVOLVED IN: signal transduction, defense response, innate immune response; LOCATED IN: intrinsic to membrane, chloroplast; EXPRESSED IN: 13 plant structures; EXPRESSED DURING: 8 growth stages; CONTAINS InterPro DOMAIN/s: Protein of unknown function DUF641, plant (InterPro:IPR006943), Toll-Interleukin …	.					-1.22174	1.63302					-1.31265
		AT2G43510	TI1	trypsin inhibitor protein 1 Member of the defensin-like (DEFL) family. Encodes putative trypsin inhibitor protein which may function in defense against herbivory. trypsin inhibitor protein 1 (TI1); FUNCTIONS IN: serine-type endopeptidase inhibitor activity; INVOLVED IN: defense response to fungus, defense response; LOCATED IN: endomembrane system, extracellular region; EXPRESSED IN: 23 plant stru…	.			2.35707	-1.50349		2.73023
		AT5G43380	TOPP6	type one serine/threonine protein phosphatase 6 encodes a type I serine/threonine protein phosphatase expressed in expressed in roots, rosettes and flowers. type one serine/threonine protein phosphatase 6 (TOPP6); CONTAINS InterPro DOMAIN/s: Metallophosphoesterase (InterPro:IPR004843), Serine/threonine-specific protein phosphatase/bis(5-nucleosyl)-tetraphosphatase (InterPro:IPR006186); BEST Arabi…	.			1.3961			1.39269
		AT4G28420		Tyrosine transaminase family protein Tyrosine transaminase family protein; FUNCTIONS IN: 1-aminocyclopropane-1-carboxylate synthase activity, transferase activity, transferring nitrogenous groups, pyridoxal phosphate binding, transaminase activity, catalytic activity; INVOLVED IN: cellular amino acid and derivative metabolic process, biosynthetic process; LOCATED IN: cellular_component unknown; E…	.			2.36303			2.83265
		AT2G05400		Ubiquitin-specific protease family C19-related protein Ubiquitin-specific protease family C19-related protein; FUNCTIONS IN: molecular_function unknown; INVOLVED IN: biological_process unknown; LOCATED IN: cellular_component unknown; EXPRESSED IN: egg cell; BEST Arabidopsis thaliana protein match is: TRAF-like family protein (TAIR:AT2G05410.1); Has 30201 Blast hits to 17322 proteins in 780 specie…	.			-2.06805		-1.3481	-2.07335		-1.53676
		AT3G21780	UGT71B6	UDP-glucosyl transferase 71B6 Encodes a protein with UDP-glucosyl transferase activity that was shown to preferentially glucosylates abscisic acid (ABA), and not its catabolites. Moreover, UGT71B6 was shown to have a strict preference for the naturally-occurring ABA enantiomer, (+)-ABA, and not its 'unnatural' relative, (-)-ABA. This is in contrast to the other identified UGT genes catalyzing the…	.			2.48938			1.97772
		AT2G15490	UGT73B4	UDP-glycosyltransferase 73B4 UDP-glycosyltransferase 73B4 (UGT73B4); FUNCTIONS IN: quercetin 3-O-glucosyltransferase activity, UDP-glycosyltransferase activity, quercetin 7-O-glucosyltransferase activity, UDP-glucosyltransferase activity, transferase activity, transferring glycosyl groups; INVOLVED IN: response to other organism; LOCATED IN: endomembrane system; EXPRESSED IN: root; CONTAINS Inter…	.					-1.73152			-1.481
		AT3G21560	UGT84A2	UDP-Glycosyltransferase superfamily protein Encodes a protein with sinapic acid:UDP-glucose glucosyltransferase activity. Mutants defective in this gene are hyper-fluorescent (which accumulate in their trichomes a compound that is likely to be 3',5'-dimethoxynaringenin chalcone or sinapoyltriacetic acid lactone, potential products of the concerted action of 4-coumarate CoA ligase and chalcone syn…	.			2.0386			2.25919
		AT5G49690		UDP-Glycosyltransferase superfamily protein UDP-Glycosyltransferase superfamily protein; FUNCTIONS IN: transferase activity, transferring glycosyl groups; INVOLVED IN: metabolic process; CONTAINS InterPro DOMAIN/s: UDP-glucuronosyl/UDP-glucosyltransferase (InterPro:IPR002213); BEST Arabidopsis thaliana protein match is: UDP-Glycosyltransferase superfamily protein (TAIR:AT5G65550.1); Has 1807 Blas…	.			2.54859	-1.68127		2.34042
		AT2G16890		UDP-Glycosyltransferase superfamily protein UDP-Glycosyltransferase superfamily protein; FUNCTIONS IN: transferase activity, transferring hexosyl groups, UDP-glycosyltransferase activity, transferase activity, transferring glycosyl groups; INVOLVED IN: metabolic process; LOCATED IN: endomembrane system; EXPRESSED IN: 17 plant structures; EXPRESSED DURING: 7 growth stages; CONTAINS InterPro DOMAIN…	.			2.08542		1.94054	2.78299
		AT3G21790		UDP-Glycosyltransferase superfamily protein UDP-Glycosyltransferase superfamily protein; FUNCTIONS IN: transferase activity, transferring hexosyl groups, UDP-glycosyltransferase activity; INVOLVED IN: metabolic process; LOCATED IN: cellular_component unknown; EXPRESSED IN: 20 plant structures; EXPRESSED DURING: 13 growth stages; CONTAINS InterPro DOMAIN/s: UDP-glucuronosyl/UDP-glucosyltransferase…	.			3.00883			4.07632
		AT1G03700		Uncharacterised protein family (UPF0497) Uncharacterised protein family (UPF0497); FUNCTIONS IN: molecular_function unknown; INVOLVED IN: biological_process unknown; LOCATED IN: endomembrane system; EXPRESSED IN: hypocotyl, flower; EXPRESSED DURING: petal differentiation and expansion stage; CONTAINS InterPro DOMAIN/s: Uncharacterised protein family UPF0497, trans-membrane plant (InterPro:IPR0067…	.			-1.10579					1.45171
		AT4G15630		Uncharacterised protein family (UPF0497) Uncharacterised protein family (UPF0497); FUNCTIONS IN: molecular_function unknown; INVOLVED IN: biological_process unknown; LOCATED IN: plasma membrane; EXPRESSED IN: 23 plant structures; EXPRESSED DURING: 13 growth stages; CONTAINS InterPro DOMAIN/s: Uncharacterised protein family UPF0497, trans-membrane plant (InterPro:IPR006702), Uncharacterised protei…	.			1.47661			1.75243
		AT4G01360		unknown protein; BEST Arabidopsis thaliana protein match is: Protein of unknown function (DUF793) (TAIR:AT1G01550.2); Has 99 Blast hits to 99 proteins in 25 species: Archae - 0; Bacteria - 10; Metazoa - 0; Fungi - 0; Plants - 89; Viruses - 0; Other Eukaryotes - 0 (source: NCBI BLink). |	.					-1.25987	5.27255	3.02703		-1.36451	-1.78712	-2.27946
		AT2G01300		unknown protein; BEST Arabidopsis thaliana protein match is: unknown protein (TAIR:AT1G15010.1); Has 73 Blast hits to 73 proteins in 12 species: Archae - 0; Bacteria - 0; Metazoa - 0; Fungi - 0; Plants - 73; Viruses - 0; Other Eukaryotes - 0 (source: NCBI BLink). |	.			-1.23934		-1.27055	2.21014	1.40513	1.50445
		AT1G79160		unknown protein; BEST Arabidopsis thaliana protein match is: unknown protein (TAIR:AT1G16500.1); Has 104 Blast hits to 102 proteins in 13 species: Archae - 0; Bacteria - 0; Metazoa - 0; Fungi - 0; Plants - 104; Viruses - 0; Other Eukaryotes - 0 (source: NCBI BLink). |	.			1.29342			2.27306
		AT5G64190		unknown protein; BEST Arabidopsis thaliana protein match is: unknown protein (TAIR:AT2G40390.1); Has 1807 Blast hits to 1807 proteins in 277 species: Archae - 0; Bacteria - 0; Metazoa - 736; Fungi - 347; Plants - 385; Viruses - 0; Other Eukaryotes - 339 (source: NCBI BLink). |	.			1.71544			2.08398
		AT5G63350		unknown protein; BEST Arabidopsis thaliana protein match is: unknown protein (TAIR:AT3G48510.1); Has 103 Blast hits to 102 proteins in 13 species: Archae - 0; Bacteria - 0; Metazoa - 2; Fungi - 0; Plants - 101; Viruses - 0; Other Eukaryotes - 0 (source: NCBI BLink). |	.			2.97475		2.48314	2.75264						-1.62553
		AT4G10860		unknown protein; BEST Arabidopsis thaliana protein match is: unknown protein (TAIR:AT4G10880.1); Has 1807 Blast hits to 1807 proteins in 277 species: Archae - 0; Bacteria - 0; Metazoa - 736; Fungi - 347; Plants - 385; Viruses - 0; Other Eukaryotes - 339 (source: NCBI BLink). |	.					-3.11498			-1.86075
		AT4G16000		unknown protein; BEST Arabidopsis thaliana protein match is: unknown protein (TAIR:AT4G15990.1); Has 30201 Blast hits to 17322 proteins in 780 species: Archae - 12; Bacteria - 1396; Metazoa - 17338; Fungi - 3422; Plants - 5037; Viruses - 0; Other Eukaryotes - 2996 (source: NCBI BLink). |	.					-1.01167	-1.46604
		AT4G15990		unknown protein; BEST Arabidopsis thaliana protein match is: unknown protein (TAIR:AT4G16024.1); Has 14 Blast hits to 14 proteins in 2 species: Archae - 0; Bacteria - 0; Metazoa - 0; Fungi - 0; Plants - 14; Viruses - 0; Other Eukaryotes - 0 (source: NCBI BLink). |	.			-1.00412			-1.44381
		AT5G47920		unknown protein; BEST Arabidopsis thaliana protein match is: unknown protein (TAIR:AT5G13880.1); Has 1807 Blast hits to 1807 proteins in 277 species: Archae - 0; Bacteria - 0; Metazoa - 736; Fungi - 347; Plants - 385; Viruses - 0; Other Eukaryotes - 339 (source: NCBI BLink). |	.			1.09537			1.5763
		AT3G48510		unknown protein; BEST Arabidopsis thaliana protein match is: unknown protein (TAIR:AT5G63350.1); Has 98 Blast hits to 98 proteins in 11 species: Archae - 0; Bacteria - 0; Metazoa - 0; Fungi - 0; Plants - 98; Viruses - 0; Other Eukaryotes - 0 (source: NCBI BLink). |	.			2.31349			3.36167						-1.87504
		AT3G19920		unknown protein; BEST Arabidopsis thaliana protein match is: unknown protein (TAIR:AT5G64230.1); Has 217 Blast hits to 217 proteins in 16 species: Archae - 0; Bacteria - 2; Metazoa - 0; Fungi - 0; Plants - 215; Viruses - 0; Other Eukaryotes - 0 (source: NCBI BLink). |	.			2.66532			3.32701
		AT1G15610		unknown protein; FUNCTIONS IN: molecular_function unknown; INVOLVED IN: biological_process unknown; LOCATED IN: cellular_component unknown; BEST Arabidopsis thaliana protein match is: unknown protein (TAIR:AT1G15630.1). |	.			-1.50837		-2.31778	-1.24912		-1.82068
		AT3G05858		unknown protein; FUNCTIONS IN: molecular_function unknown; INVOLVED IN: biological_process unknown; LOCATED IN: cellular_component unknown; BEST Arabidopsis thaliana protein match is: unknown protein (TAIR:AT5G26620.1); Has 30201 Blast hits to 17322 proteins in 780 species: Archae - 12; Bacteria - 1396; Metazoa - 17338; Fungi - 3422; Plants - 5037; Viruses - 0; Other Eukaryotes - 2996 (source: NC…	.			1.32327			2.27514
		AT1G07680		unknown protein; FUNCTIONS IN: molecular_function unknown; INVOLVED IN: biological_process unknown; LOCATED IN: endomembrane system; BEST Arabidopsis thaliana protein match is: unknown protein (TAIR:AT5G23903.1); Has 7 Blast hits to 7 proteins in 2 species: Archae - 0; Bacteria - 0; Metazoa - 0; Fungi - 0; Plants - 7; Viruses - 0; Other Eukaryotes - 0 (source: NCBI BLink). |	.			1.05685					-1.1305
		AT3G23450		unknown protein; FUNCTIONS IN: molecular_function unknown; INVOLVED IN: biological_process unknown; LOCATED IN: endomembrane system; EXPRESSED IN: 14 plant structures; EXPRESSED DURING: 8 growth stages; Has 694543 Blast hits to 47111 proteins in 2535 species: Archae - 1794; Bacteria - 163056; Metazoa - 258989; Fungi - 49151; Plants - 70496; Viruses - 8919; Other Eukaryotes - 142138 (source: NCBI …	.			1.54348			2.22967
		AT5G44580		unknown protein; FUNCTIONS IN: molecular_function unknown; INVOLVED IN: biological_process unknown; LOCATED IN: endomembrane system; EXPRESSED IN: 18 plant structures; EXPRESSED DURING: 12 growth stages; BEST Arabidopsis thaliana protein match is: unknown protein (TAIR:AT5G44582.1); Has 30201 Blast hits to 17322 proteins in 780 species: Archae - 12; Bacteria - 1396; Metazoa - 17338; Fungi - 3422;…	.			-1.29061				1.3606
		AT3G43850		unknown protein; FUNCTIONS IN: molecular_function unknown; INVOLVED IN: biological_process unknown; LOCATED IN: vacuole; BEST Arabidopsis thaliana protein match is: unknown protein (TAIR:AT5G21940.1); Has 215 Blast hits to 215 proteins in 19 species: Archae - 0; Bacteria - 0; Metazoa - 0; Fungi - 0; Plants - 213; Viruses - 0; Other Eukaryotes - 2 (source: NCBI BLink). |	.			-3.08194			-1.50534
		AT4G16240		unknown protein; Has 17010 Blast hits to 4557 proteins in 509 species: Archae - 32; Bacteria - 2889; Metazoa - 6537; Fungi - 648; Plants - 4769; Viruses - 447; Other Eukaryotes - 1688 (source: NCBI BLink). |	.			1.75037			2.44004
		AT5G54585		unknown protein; Has 30201 Blast hits to 17322 proteins in 780 species: Archae - 12; Bacteria - 1396; Metazoa - 17338; Fungi - 3422; Plants - 5037; Viruses - 0; Other Eukaryotes - 2996 (source: NCBI BLink). |	.			-2.14609			-1.70675						-1.89803
		AT1G54575		unknown protein; Has 35333 Blast hits to 34131 proteins in 2444 species: Archae - 798; Bacteria - 22429; Metazoa - 974; Fungi - 991; Plants - 531; Viruses - 0; Other Eukaryotes - 9610 (source: NCBI BLink). |	.			1.10981			2.43331
		AT3G55790		unknown protein; Has 698 Blast hits to 549 proteins in 106 species: Archae - 0; Bacteria - 92; Metazoa - 317; Fungi - 24; Plants - 183; Viruses - 2; Other Eukaryotes - 80 (source: NCBI BLink). |	.			-1.3579		-1.36812			1.44264
		AT4G24110		unknown protein; Has 76 Blast hits to 76 proteins in 13 species: Archae - 0; Bacteria - 0; Metazoa - 1; Fungi - 0; Plants - 75; Viruses - 0; Other Eukaryotes - 0 (source: NCBI BLink). |	.					2.21105	3.45014	1.12254
		AT1G79680	WAKL10	WALL ASSOCIATED KINASE (WAK)-LIKE 10 WALL ASSOCIATED KINASE (WAK)-LIKE 10 (WAKL10); FUNCTIONS IN: kinase activity; INVOLVED IN: protein amino acid phosphorylation; LOCATED IN: endomembrane system, integral to membrane; EXPRESSED IN: 10 plant structures; EXPRESSED DURING: 8 growth stages; CONTAINS InterPro DOMAIN/s: Wall-associated kinase (InterPro:IPR013695), EGF-like calcium-binding, conserved s…	.			3.52113			2.03337
		AT1G21270	WAK2	wall-associated kinase 2 cytoplasmic serine/threonine protein kinase induced by salicylic acid. mutant plants exhibit a loss of cell expansion and dependence on sugars and salts for seedling growth, affecting the expression and activity of vacuolar invertase. wall-associated kinase 2 (WAK2); FUNCTIONS IN: protein serine/threonine kinase activity, protein kinase activity, calcium ion binding, ATP …	.			-1.25074			-1.64748
		AT1G17840	WBC11	white-brown complex homolog protein 11 Encodes a plasma membrane-localized ATP-binding cassette transporter, that is required for cutin transport to the extracellular matrix. white-brown complex homolog protein 11 (WBC11); FUNCTIONS IN: ATPase activity, coupled to transmembrane movement of substances, fatty acid transporter activity; INVOLVED IN: cutin transport, fatty acid transport; LOCATED IN:…	.			1.24965			1.87391
		AT4G10265		Wound-responsive family protein Wound-responsive family protein; CONTAINS InterPro DOMAIN/s: Protein of unknown function wound-induced (InterPro:IPR022251); BEST Arabidopsis thaliana protein match is: Wound-responsive family protein (TAIR:AT4G10270.1); Has 164 Blast hits to 163 proteins in 16 species: Archae - 0; Bacteria - 0; Metazoa - 0; Fungi - 0; Plants - 164; Viruses - 0; Other Eukaryotes - …	.					3.7757	6.9935
		AT3G01970	WRKY45	WRKY DNA-binding protein 45 member of WRKY Transcription Factor; Group I WRKY DNA-binding protein 45 (WRKY45); CONTAINS InterPro DOMAIN/s: DNA-binding WRKY (InterPro:IPR003657); BEST Arabidopsis thaliana protein match is: WRKY DNA-binding protein 75 (TAIR:AT5G13080.1); Has 3497 Blast hits to 3049 proteins in 189 species: Archae - 0; Bacteria - 0; Metazoa - 0; Fungi - 0; Plants - 3482; Viruses - 0…	.			1.81599			1.85859	1.03854
		AT5G01900	WRK762	WRKY DNA-binding protein 62 member of WRKY Transcription Factor; Group III WRKY DNA-binding protein 62 (WRKY62); CONTAINS InterPro DOMAIN/s: DNA-binding WRKY (InterPro:IPR003657); BEST Arabidopsis thaliana protein match is: WRKY DNA-binding protein 38 (TAIR:AT5G22570.1); Has 3146 Blast hits to 2717 proteins in 131 species: Archae - 0; Bacteria - 0; Metazoa - 0; Fungi - 0; Plants - 3132; Viruses -…	.				1.31398	-1.88386			-1.49238
		AT5G59390		XH/XS domain-containing protein XH/XS domain-containing protein; CONTAINS InterPro DOMAIN/s: Domain of unknown function XS (InterPro:IPR005380), Domain of unknown function XH (InterPro:IPR005379); BEST Arabidopsis thaliana protein match is: XH/XS domain-containing protein (TAIR:AT4G01180.1); Has 1807 Blast hits to 1807 proteins in 277 species: Archae - 0; Bacteria - 0; Metazoa - 736; Fungi - 347;…	.			1.45114			2.88209
		AT4G30270	XTH24	xyloglucan endotransglucosylase/hydrolase 24 encodes a protein similar to endo xyloglucan transferase in sequence. It is also very similar to BRU1 in soybean, which is involved in brassinosteroid response. xyloglucan endotransglucosylase/hydrolase 24 (XTH24); FUNCTIONS IN: hydrolase activity, acting on glycosyl bonds, xyloglucan:xyloglucosyl transferase activity; INVOLVED IN: aging, response to g…	.			1.78361			1.15273
		AT2G25900		Zinc finger C-x8-C-x5-C-x3-H type family protein putative Cys3His zinc finger protein (ATCTH) mRNA, complete ATCTH; CONTAINS InterPro DOMAIN/s: Zinc finger, CCCH-type (InterPro:IPR000571); BEST Arabidopsis thaliana protein match is: CCCH-type zinc finger family protein (TAIR:AT2G19810.1). |	.			-1.39849			-1.05124
Shoots	209	AT5G53250	AGP22	arabinogalactan protein 22 arabinogalactan protein 22 (AGP22); CONTAINS InterPro DOMAIN/s: Protein of unknown function DUF1070 (InterPro:IPR009424); BEST Arabidopsis thaliana protein match is: arabinogalactan protein 20 (TAIR:AT3G61640.1); Has 1807 Blast hits to 1807 proteins in 277 species: Archae - 0; Bacteria - 0; Metazoa - 736; Fungi - 347; Plants - 385; Viruses - 0; Other Eukaryotes - 339 (s…	.	Yes	Yes									-2.06648	1.55382
		AT2G04050		MATE efflux family protein MATE efflux family protein; FUNCTIONS IN: antiporter activity, drug transmembrane transporter activity, transporter activity; INVOLVED IN: drug transmembrane transport, transmembrane transport; LOCATED IN: membrane; EXPRESSED IN: stem, leaf whorl, stamen; EXPRESSED DURING: 4 anthesis, petal differentiation and expansion stage; CONTAINS InterPro DOMAIN/s: MATE family tra…	.	Yes	Yes				4.11279			2.8885			1.67704
		AT4G29780		unknown protein; BEST Arabidopsis thaliana protein match is: unknown protein (TAIR:AT5G12010.1); Has 945 Blast hits to 944 proteins in 87 species: Archae - 0; Bacteria - 0; Metazoa - 519; Fungi - 43; Plants - 365; Viruses - 0; Other Eukaryotes - 18 (source: NCBI BLink). |	.	Yes	Yes	-1.53214		-1.65242				-2.79044	-1.49186	-3.49616	1.00002		1.18199
		AT5G51720		2 iron, 2 sulfur cluster binding 2 iron, 2 sulfur cluster binding; FUNCTIONS IN: 2 iron, 2 sulfur cluster binding; INVOLVED IN: biological_process unknown; LOCATED IN: chloroplast stroma, chloroplast; EXPRESSED IN: 20 plant structures; EXPRESSED DURING: 13 growth stages; CONTAINS InterPro DOMAIN/s: Iron sulphur-containing domain, CDGSH-type (InterPro:IPR018967); Has 30201 Blast hits to 17322 prot…	.	Yes								-1.74896			-5.92667		-1.59405
		AT4G10500		2-oxoglutarate (2OG) and Fe(II)-dependent oxygenase superfamily protein 2-oxoglutarate (2OG) and Fe(II)-dependent oxygenase superfamily protein; FUNCTIONS IN: oxidoreductase activity, acting on paired donors, with incorporation or reduction of molecular oxygen, 2-oxoglutarate as one donor, and incorporation of one atom each of oxygen into both donors, oxidoreductase activity; INVOLVED IN: seconda…	.	Yes								1.94563					-1.4924
		AT3G03480		acetyl CoA:(Z)-3-hexen-1-ol acetyltransferase acetyl CoA:(Z)-3-hexen-1-ol acetyltransferase (CHAT); CONTAINS InterPro DOMAIN/s: Transferase (InterPro:IPR003480); BEST Arabidopsis thaliana protein match is: HXXXD-type acyl-transferase family protein (TAIR:AT5G17540.1); Has 2522 Blast hits to 2511 proteins in 130 species: Archae - 0; Bacteria - 0; Metazoa - 0; Fungi - 44; Plants - 2476; Viruses - 0…	.	Yes										1.06792	-5.29778		-1.52798
		AT3G48080		alpha/beta-Hydrolases superfamily protein alpha/beta-Hydrolases superfamily protein; FUNCTIONS IN: lipase activity, triglyceride lipase activity, signal transducer activity; INVOLVED IN: lipid metabolic process; LOCATED IN: cellular_component unknown; EXPRESSED IN: 19 plant structures; EXPRESSED DURING: 12 growth stages; CONTAINS InterPro DOMAIN/s: Lipase, class 3 (InterPro:IPR002921); BEST Arabi…	.	Yes										-1.10784	1.93479		1.83429
		AT4G14400		ankyrin repeat family protein encodes a novel protein with putative ankyrin and transmembrane regions. It is a member of one of the largest uncharacterized gene families in higher plants. The gene is involved in resistance to Pseudomonas syringae. ACCELERATED CELL DEATH 6 (ACD6); CONTAINS InterPro DOMAIN/s: Ankyrin repeat-containing domain (InterPro:IPR020683), Ankyrin repeat (InterPro:IPR002110)…	.	Yes										-1.37447	1.917		2.13973
		AT5G51780		basic helix-loop-helix (bHLH) DNA-binding superfamily protein basic helix-loop-helix (bHLH) DNA-binding superfamily protein; FUNCTIONS IN: DNA binding, sequence-specific DNA binding transcription factor activity; INVOLVED IN: regulation of transcription; LOCATED IN: nucleus; CONTAINS InterPro DOMAIN/s: Helix-loop-helix DNA-binding domain (InterPro:IPR001092), Helix-loop-helix DNA-binding (InterPr…	.	Yes										-2.27548		-2.63108
		AT5G48560		basic helix-loop-helix (bHLH) DNA-binding superfamily protein basic helix-loop-helix (bHLH) DNA-binding superfamily protein; FUNCTIONS IN: DNA binding, sequence-specific DNA binding transcription factor activity; INVOLVED IN: regulation of transcription; LOCATED IN: nucleus; EXPRESSED IN: 14 plant structures; EXPRESSED DURING: LP.06 six leaves visible, LP.04 four leaves visible, 4 anthesis, petal…	.	Yes										-2.00888	1.20794	-1.99332
		AT3G57260	BGL2	beta-1,3-glucanase 2 beta 1,3-glucanase "beta-1,3-glucanase 2" (BGL2); FUNCTIONS IN: glucan 1,3-beta-glucosidase activity, protein binding, cellulase activity, hydrolase activity, hydrolyzing O-glycosyl compounds; INVOLVED IN: systemic acquired resistance, response to cold; LOCATED IN: apoplast, cell wall, vacuole; EXPRESSED IN: 17 plant structures; EXPRESSED DURING: 9 growth stages; CONTAINS Int…	.	Yes					3.04208			1.65416					-1.80468
		AT3G48360	BT2	BTB and TAZ domain protein 2 encodes a protein (BT2) that is an essential component of the TAC1-mediated telomerase activation pathway. Acts redundantly with BT3 and BT1 during female gametophyte development and with BT3 during male gametophyte development. BT2 also mediates multiple responses to nutrients, stresses, and hormones. BTB and TAZ domain protein 2 (BT2); CONTAINS InterPro DOMAIN/s: BT…	.	Yes		-1.45963						-1.11757		-1.70296		1.33617	1.15776
		AT4G00700		C2 calcium/lipid-binding plant phosphoribosyltransferase family protein C2 calcium/lipid-binding plant phosphoribosyltransferase family protein; CONTAINS InterPro DOMAIN/s: C2 membrane targeting protein (InterPro:IPR018029), C2 calcium/lipid-binding domain, CaLB (InterPro:IPR008973), Phosphoribosyltransferase C-terminal (InterPro:IPR013583), C2 calcium-dependent membrane targeting (InterPro:IPR00…	.	Yes								1.64574					-1.52825
		AT4G27280		Calcium-binding EF-hand family protein Calcium-binding EF-hand family protein; FUNCTIONS IN: calcium ion binding; INVOLVED IN: response to karrikin; EXPRESSED IN: 23 plant structures; EXPRESSED DURING: 13 growth stages; CONTAINS InterPro DOMAIN/s: EF-Hand 1, calcium-binding site (InterPro:IPR018247), EF-HAND 2 (InterPro:IPR018249), EF-hand-like domain (InterPro:IPR011992); BEST Arabidopsis thalia…	.	Yes		-1.70334						-1.81996	-1.2353	-2.50584	1.09045
		AT3G43670		Copper amine oxidase family protein Copper amine oxidase family protein; FUNCTIONS IN: primary amine oxidase activity, quinone binding, copper ion binding; INVOLVED IN: oxidation reduction, amine metabolic process; LOCATED IN: endomembrane system; EXPRESSED IN: 20 plant structures; EXPRESSED DURING: 13 growth stages; CONTAINS InterPro DOMAIN/s: Copper amine oxidase, N-terminal (InterPro:IPR016182…	.	Yes		-1.01936						-1.6866			-4.5812		-1.1626
		AT5G45340	CYP707A3	cytochrome P450, family 707, subfamily A, polypeptide 3 Encodes a protein with ABA 8'-hydroxylase activity; involved in ABA catabolism. Mutant analyses show that disruption in the gene results in more drought tolerance whereas overexpression results in increased transpiration rate and reduced drought tolerance. Gene involved in postgermination growth. Plant P450 CYP707A3, ABA 8'-hydroxylase, bind…	.	Yes								-2.72315	-1.61138	-3.3364	2.51611
		AT2G30770	CYP71A13	cytochrome P450, family 71, subfamily A, polypeptide 13 putative cytochrome P450 cytochrome P450, family 71, subfamily A, polypeptide 13 (CYP71A13); CONTAINS InterPro DOMAIN/s: Cytochrome P450 (InterPro:IPR001128), Cytochrome P450, E-class, group I (InterPro:IPR002401), Cytochrome P450, conserved site (InterPro:IPR017972); BEST Arabidopsis thaliana protein match is: cytochrome P450, family 71, su…	.	Yes					5.60674			2.40615	-1.74071		4.87926	1.83705	2.49801
		AT3G48520	CYP93B3	cytochrome P450, family 94, subfamily B, polypeptide 3 member of CYP94B "cytochrome P450, family 94, subfamily B, polypeptide 3" (CYP94B3); FUNCTIONS IN: electron carrier activity, monooxygenase activity, iron ion binding, oxygen binding, heme binding; INVOLVED IN: oxidation reduction; LOCATED IN: endomembrane system; EXPRESSED IN: 14 plant structures; EXPRESSED DURING: 7 growth stages; CONTAINS …	.	Yes					2.55111	1.39199		-2.04324	-3.23897	-7.95095			4.78405
		AT4G24570	DIC2	dicarboxylate carrier 2 Encodes one of the mitochondrial dicarboxylate carriers (DIC): DIC1 (AT2G22500), DIC2 (AT4G24570), DIC3 (AT5G09470). dicarboxylate carrier 2 (DIC2); FUNCTIONS IN: binding, dicarboxylic acid transmembrane transporter activity; INVOLVED IN: transport, mitochondrial transport; LOCATED IN: mitochondrial inner membrane, membrane; EXPRESSED IN: 24 plant structures; EXPRESSED DUR…	.	Yes		-2.0945						-3.23476	-1.68671	-3.70507	1.91343		1.54425
		AT5G60490	FLA12	FASCICLIN-like arabinogalactan-protein 12 FASCICLIN-like arabinogalactan-protein 12 (FLA12); LOCATED IN: plasma membrane, anchored to membrane; EXPRESSED IN: 22 plant structures; EXPRESSED DURING: 13 growth stages; CONTAINS InterPro DOMAIN/s: FAS1 domain (InterPro:IPR000782); BEST Arabidopsis thaliana protein match is: FASCICLIN-like arabinogalactan-protein 11 (TAIR:AT5G03170.1); Has 1807 Blast h…	.	Yes										-1.68289	1.60723	-1.79555
		AT4G25100	FSD1	Fe superoxide dismutase 1 Fe-superoxide dismutase Fe superoxide dismutase 1 (FSD1); CONTAINS InterPro DOMAIN/s: Manganese/iron superoxide dismutase, N-terminal (InterPro:IPR019831), Manganese/iron superoxide dismutase (InterPro:IPR001189), Manganese/iron superoxide dismutase, C-terminal (InterPro:IPR019832), Manganese/iron superoxide dismutase, binding site (InterPro:IPR019833); BEST Arabidopsis …	.	Yes		-6.08999	2.10075					-5.47128	1.33611	-1.00193		2.21553
		AT2G40300	FER4	ferritin 4 Encodes FERRITIN 4, AtFER4. Ferritins are a class of 24-mer multi-meric proteins found in all kingdoms of life. Function as the main iron store in mammals. Evidence suggests that Arabidopsis ferritins are essential to protect cells against oxidative damage, but they do not constitute the major iron pool. Localize to mitochondria. Knock out mutants are not sensitive to abiotic stress. f…	.	Yes					-1.82362			-1.64238			-4.3613		-1.81485
		AT1G63030	DDF2	Integrase-type DNA-binding superfamily protein encodes a member of the DREB subfamily A-1 of ERF/AP2 transcription factor family (DDF2). The protein contains one AP2 domain. There are six members in this subfamily, including CBF1, CBF2, and CBF3. Overexpression of this gene results in the reduction of gibberellic acid biosynthesis. This gene is expressed in all tissues examined, but most abundant…	.	Yes										-3.86484			5.74427
		AT2G29130	LAC2	laccase 2 putative laccase, knockout mutant had reduced root elongation under PEG-induced dehydration laccase 2 (LAC2); FUNCTIONS IN: laccase activity; INVOLVED IN: response to water deprivation; LOCATED IN: endomembrane system, apoplast; EXPRESSED IN: 6 plant structures; EXPRESSED DURING: petal differentiation and expansion stage; CONTAINS InterPro DOMAIN/s: Multicopper oxidase, type 3 (InterPro…	.	Yes					-1.22588				-1.20462	-1.33977	1.33043	-1.57806
		AT2G27080		Late embryogenesis abundant (LEA) hydroxyproline-rich glycoprotein family Late embryogenesis abundant (LEA) hydroxyproline-rich glycoprotein family; CONTAINS InterPro DOMAIN/s: Late embryogenesis abundant protein, group 2 (InterPro:IPR004864); BEST Arabidopsis thaliana protein match is: Late embryogenesis abundant (LEA) hydroxyproline-rich glycoprotein family (TAIR:AT5G21130.1); Has 35333 Blast h…	.	Yes					1.17603			-1.42635	-2.23092	-3.9687	1.63663		1.88837
		AT3G02480		Late embryogenesis abundant protein (LEA) family protein Late embryogenesis abundant protein (LEA) family protein; BEST Arabidopsis thaliana protein match is: Late embryogenesis abundant protein (LEA) family protein (TAIR:AT5G38760.1); Has 213 Blast hits to 189 proteins in 38 species: Archae - 0; Bacteria - 0; Metazoa - 9; Fungi - 12; Plants - 190; Viruses - 0; Other Eukaryotes - 2 (source: NCBI …	.	Yes					3.09246			1.34101				-3.14282	-3.98896
		AT5G03350		Legume lectin family protein Legume lectin family protein; FUNCTIONS IN: carbohydrate binding, binding; INVOLVED IN: biological_process unknown; LOCATED IN: apoplast, cell wall, chloroplast; EXPRESSED IN: 19 plant structures; EXPRESSED DURING: 12 growth stages; CONTAINS InterPro DOMAIN/s: Legume lectin, beta chain (InterPro:IPR001220), Concanavalin A-like lectin/glucanase, subgroup (InterPro:IPR0…	.	Yes										-1.68069	2.0453		2.43628
		AT3G28917	MIF2	mini zinc finger 2 mini zinc finger 2 (MIF2); CONTAINS InterPro DOMAIN/s: ZF-HD homeobox protein, Cys/His-rich dimerisation domain (InterPro:IPR006456); BEST Arabidopsis thaliana protein match is: mini zinc finger (TAIR:AT1G18835.1); Has 35333 Blast hits to 34131 proteins in 2444 species: Archae - 798; Bacteria - 22429; Metazoa - 974; Fungi - 991; Plants - 531; Viruses - 0; Other Eukaryotes - 961…	.	Yes										-5.33601	1.0044
		AT1G09540	MYB61	myb domain protein 61 Encodes putative transcription factor. Mutants lack of mucilage extrusion from the seeds during imbibition. Reduced quantities of mucilage are deposited during the development of the seed coat epidermis in myb61 mutants. Expressed in guard cells,loss of function mutations show an increase in stomatal pore opening suggesting a role in ABA independent regulation of stomatal po…	.	Yes										-3.19385	1.24843	-2.26683
		AT2G47130		NAD(P)-binding Rossmann-fold superfamily protein NAD(P)-binding Rossmann-fold superfamily protein; FUNCTIONS IN: oxidoreductase activity, binding, catalytic activity; INVOLVED IN: oxidation reduction, metabolic process; LOCATED IN: cellular_component unknown; EXPRESSED IN: 18 plant structures; EXPRESSED DURING: 11 growth stages; CONTAINS InterPro DOMAIN/s: NAD(P)-binding domain (InterPro:IPR01604…	.	Yes										-1.41161	1.66631		1.21649
		AT1G02450	NIMIN1	NIM1-interacting 1 NIMIN1 modulates PR gene expression according the following model: NPR1 forms a ternary complex with NIMIN1 and TGA factors upon SAR induction that binds to a positive regulatory cis-element of the PR-1 promoter, termed LS7. This leads to PR-1 gene induction. NIMIN1 decreases transcriptional activation, possibly through its EAR motif, which results in fine-tuning of PR-1 gene e…	.	Yes		-1.43026	1.22953	-1.27355						-1.73624	2.60495		1.87976
		AT3G22231	PCC1	pathogen and circadian controlled 1 Encodes a member of a novel 6 member Arabidopsis gene family. Expression of PCC1 is regulated by the circadian clock and is upregulated in response to both virulent and avirulent strains of Pseudomonas syringae pv. tomato. PATHOGEN AND CIRCADIAN CONTROLLED 1 (PCC1); FUNCTIONS IN: molecular_function unknown; INVOLVED IN: response to fungus, response to bacterium…	.	Yes		-3.18657								-2.51406	3.80474	1.80175	3.89198
		AT2G14610	PR1	pathogenesis-related gene 1 PR1 gene expression is induced in response to a variety of pathogens. It is a useful molecular marker for the SAR response. Though the Genbank record for the cDNA associated to this gene is called 'PR-1-like', the sequence actually corresponds to PR1. Expression of this gene is salicylic-acid responsive. pathogenesis-related gene 1 (PR1); FUNCTIONS IN: molecular_functi…	.	Yes								1.96424		-1.73086	3.57746
		AT5G42180		Peroxidase superfamily protein Peroxidase superfamily protein; FUNCTIONS IN: peroxidase activity, heme binding; INVOLVED IN: oxidation reduction, response to oxidative stress; LOCATED IN: plant-type cell wall; EXPRESSED IN: 10 plant structures; EXPRESSED DURING: 4 anthesis, C globular stage, petal differentiation and expansion stage; CONTAINS InterPro DOMAIN/s: Haem peroxidase (InterPro:IPR010255…	.	Yes								-1.46554	-2.02759	-7.83413	1.96759	-4.09696
		AT1G35140	PHI-1	Phosphate-responsive 1 family protein At1g35140 (At1g35140/T32G9_32) mRNA, complete cds PHOSPHATE-INDUCED 1 (PHI-1); CONTAINS InterPro DOMAIN/s: Phosphate-induced protein 1 (InterPro:IPR006766); BEST Arabidopsis thaliana protein match is: Phosphate-responsive 1 family protein (TAIR:AT4G08950.1); Has 400 Blast hits to 400 proteins in 24 species: Archae - 0; Bacteria - 2; Metazoa - 0; Fungi - 0; Pl…	.	Yes					3.20212	1.33612		-4.10557	-2.96978	-4.7895	1.76649		2.50303
		AT1G33960		P-loop containing nucleoside triphosphate hydrolases superfamily protein Identified as a gene that is induced by avirulence gene avrRpt2 and RPS2 after infection with Pseudomonas syringae pv maculicola strain ES4326 carrying avrRpt2 AVRRPT2-INDUCED GENE 1 (AIG1); FUNCTIONS IN: GTP binding; INVOLVED IN: response to bacterium; EXPRESSED IN: 11 plant structures; EXPRESSED DURING: 8 growth stages; CO…	.	Yes					5.69109			2.73036			1.6139
		AT3G28510		P-loop containing nucleoside triphosphate hydrolases superfamily protein P-loop containing nucleoside triphosphate hydrolases superfamily protein; FUNCTIONS IN: nucleoside-triphosphatase activity, ATPase activity, nucleotide binding, ATP binding; EXPRESSED IN: 7 plant structures; EXPRESSED DURING: LP.06 six leaves visible, LP.04 four leaves visible, 4 anthesis, 4 leaf senescence stage; CONTAINS I…	.	Yes		-1.68583		-2.03951						-2.71319	2.06694
		AT4G18190	PUP6	purine permease 6 Member of a family of proteins related to PUP1, a purine transporter. May be involved in the transport of purine and purine derivatives such as cytokinins, across the plasma membrane. purine permease 6 (PUP6); CONTAINS InterPro DOMAIN/s: Protein of unknown function DUF250 (InterPro:IPR004853); BEST Arabidopsis thaliana protein match is: Drug/metabolite transporter superfamily pr…	.	Yes										-2.34995	1.17179
		AT3G49160		pyruvate kinase family protein Expression of the gene is downregulated in the presence of paraquat, an inducer of photoxidative stress. pyruvate kinase family protein; FUNCTIONS IN: pyruvate kinase activity, magnesium ion binding, potassium ion binding, catalytic activity; INVOLVED IN: glycolysis; LOCATED IN: cellular_component unknown; EXPRESSED IN: 24 plant structures; EXPRESSED DURING: 15 grow…	.	Yes								-2.4339			-7.05586		-2.42393
		AT3G56710	SIB1	sigma factor binding protein 1 Sig1 binding protein; interacts with Sig1R4. As well as Sig1, SibI is imported into chloroplasts and its expression is light-dependent in mature chloroplasts. sigma factor binding protein 1 (SIB1); CONTAINS InterPro DOMAIN/s: VQ (InterPro:IPR008889); BEST Arabidopsis thaliana protein match is: VQ motif-containing protein (TAIR:AT2G41180.1); Has 66 Blast hits to 66 p…	.	Yes		-1.13463								-1.89365	1.63271		1.68805
		AT4G23496	SPIL5	SPIRAL1-like5 Belongs to a six-member gene family in Arabidopsis; all members share high sequence similarity in amino- and carboxy-terminal regions. Regulates cortical microtubule organization. Mutant plants exhibit altered patterns of root, leaf and petal growth as a result of defective anisotropic cell expansion. SPIRAL1-like5 (SP1L5); BEST Arabidopsis thaliana protein match is: SPIRAL1-like2 (…	.	Yes										-1.68414	1.5257	-1.59661
		AT1G78950		Terpenoid cyclases family protein Terpenoid cyclases family protein; CONTAINS InterPro DOMAIN/s: Terpene synthase, conserved site (InterPro:IPR002365), Squalene cyclase (InterPro:IPR018333), Terpenoid cylases/protein prenyltransferase alpha-alpha toroid (InterPro:IPR008930), Prenyltransferase/squalene oxidase (InterPro:IPR001330); BEST Arabidopsis thaliana protein match is: camelliol C synthase 1…	.	Yes										-2.36028		-1.51093
		AT4G27652		unknown protein; BEST Arabidopsis thaliana protein match is: unknown protein (TAIR:AT4G27657.1); Has 30201 Blast hits to 17322 proteins in 780 species: Archae - 12; Bacteria - 1396; Metazoa - 17338; Fungi - 3422; Plants - 5037; Viruses - 0; Other Eukaryotes - 2996 (source: NCBI BLink). |	.	Yes		-1.08873						-1.89791	-1.50158	-2.23946			1.0612
		AT2G25625		unknown protein; FUNCTIONS IN: molecular_function unknown; INVOLVED IN: biological_process unknown; LOCATED IN: chloroplast; EXPRESSED IN: 10 plant structures; EXPRESSED DURING: LP.06 six leaves visible, LP.04 four leaves visible, 4 anthesis, petal differentiation and expansion stage; Has 24 Blast hits to 24 proteins in 9 species: Archae - 0; Bacteria - 0; Metazoa - 0; Fungi - 0; Plants - 24; Vir…	.	Yes								-3.34494			-2.84008	-4.65775	-3.40364
		AT2G36885		unknown protein; FUNCTIONS IN: molecular_function unknown; LOCATED IN: chloroplast; EXPRESSED IN: 22 plant structures; EXPRESSED DURING: 13 growth stages; Has 35333 Blast hits to 34131 proteins in 2444 species: Archae - 798; Bacteria - 22429; Metazoa - 974; Fungi - 991; Plants - 531; Viruses - 0; Other Eukaryotes - 9610 (source: NCBI BLink). |	.	Yes								-1.21479			-4.25186
		AT2G40750	WRKY54	WRKY DNA-binding protein 54 member of WRKY Transcription Factor; Group III WRKY DNA-binding protein 54 (WRKY54); CONTAINS InterPro DOMAIN/s: DNA-binding WRKY (InterPro:IPR003657); BEST Arabidopsis thaliana protein match is: WRKY DNA-binding protein 70 (TAIR:AT3G56400.1); Has 3183 Blast hits to 2752 proteins in 165 species: Archae - 0; Bacteria - 0; Metazoa - 0; Fungi - 0; Plants - 3171; Viruses -…	.	Yes		-1.09736								-2.21411	2.6134	1.43459	2.68549
		AT3G56400	WRKY70	WRKY DNA-binding protein 70 member of WRKY Transcription Factor; Group III. Function as activator of SA-dependent defense genes and a repressor of JA-regulated genes. WRKY70-controlled suppression of JA-signaling is partly executed by NPR1. WRKY DNA-binding protein 70 (WRKY70); CONTAINS InterPro DOMAIN/s: DNA-binding WRKY (InterPro:IPR003657); BEST Arabidopsis thaliana protein match is: WRKY DNA-…	.	Yes		-2.331		-1.94551						-1.50308	1.44762		1.57777
		AT1G32170	XTH30	xyloglucan endotransglucosylase/hydrolase 30 xyloglucan endotransglycosylase-related protein (XTR4) xyloglucan endotransglucosylase/hydrolase 30 (XTH30); FUNCTIONS IN: hydrolase activity, acting on glycosyl bonds, xyloglucan:xyloglucosyl transferase activity, hydrolase activity, hydrolyzing O-glycosyl compounds; INVOLVED IN: carbohydrate metabolic process, cellular glucan metabolic process; LOCAT…	.	Yes									-1.2857	-1.61818	1.88879
		AT5G57560	TCH4	Xyloglucan endotransglucosylase/hydrolase family protein Encodes a cell wall-modifying enzyme, rapidly upregulated in response to environmental stimuli Touch 4 (TCH4); CONTAINS InterPro DOMAIN/s: Xyloglucan endotransglucosylase/hydrolase (InterPro:IPR016455), Xyloglucan endo-transglycosylase, C-terminal (InterPro:IPR010713), Concanavalin A-like lectin/glucanase, subgroup (InterPro:IPR013320), Con…	.	Yes		-1.68531						-2.41411	-1.74997	-3.1513	1.9906		1.47121
		AT1G67030	ZFP6	zinc finger protein 6 Encodes a zinc finger protein containing only a single zinc finger. zinc finger protein 6 (ZFP6); FUNCTIONS IN: sequence-specific DNA binding transcription factor activity, zinc ion binding, nucleic acid binding; INVOLVED IN: regulation of transcription; LOCATED IN: cytosolic ribosome; EXPRESSED IN: 7 plant structures; EXPRESSED DURING: 4 anthesis, petal differentiation and …	.	Yes										-3.15186		-2.16485
		AT3G59845		Zinc-binding dehydrogenase family protein Zinc-binding dehydrogenase family protein; FUNCTIONS IN: oxidoreductase activity, binding, catalytic activity, zinc ion binding; INVOLVED IN: response to oxidative stress; EXPRESSED IN: 8 plant structures; EXPRESSED DURING: 4 anthesis, C globular stage, petal differentiation and expansion stage, E expanded cotyledon stage, D bilateral stage; CONTAINS Inte…	.	Yes										-2.29033		-1.52914
		AT4G34850	LAP5	Chalcone and stilbene synthase family protein LESS ADHESIVE POLLEN 5 (LAP5); FUNCTIONS IN: transferase activity, transferring acyl groups other than amino-acyl groups, catalytic activity, acyltransferase activity; INVOLVED IN: phenylpropanoid biosynthetic process, pollen exine formation; LOCATED IN: cellular_component unknown; EXPRESSED IN: leaf whorl, sepal, anther, flower, seed; EXPRESSED DURIN…	.	Yes										-1.01716	1.05084
		AT1G21120		O-methyltransferase family protein O-methyltransferase family protein; FUNCTIONS IN: methyltransferase activity, O-methyltransferase activity, protein dimerization activity; LOCATED IN: cytosol; EXPRESSED IN: 9 plant structures; EXPRESSED DURING: LP.04 four leaves visible, LP.10 ten leaves visible, LP.08 eight leaves visible; CONTAINS InterPro DOMAIN/s: Winged helix-turn-helix transcription repre…	.	Yes						1.39712				-1.80352	-1.45525		-1.68229
		AT2G20800	NDB4	NAD(P)H dehydrogenase B4 NAD(P)H dehydrogenase B4 (NDB4); FUNCTIONS IN: NADH dehydrogenase activity; INVOLVED IN: oxidation reduction; LOCATED IN: extrinsic to mitochondrial inner membrane, mitochondrion, plastid; EXPRESSED IN: 7 plant structures; CONTAINS InterPro DOMAIN/s: Pyridine nucleotide-disulphide oxidoreductase, class-II (InterPro:IPR000103), FAD-dependent pyridine nucleotide-disulphide …	.	Yes					2.718			3.20715			6.33474
		AT1G14880	PCR1	PLANT CADMIUM RESISTANCE 1 PLANT CADMIUM RESISTANCE 1 (PCR1); FUNCTIONS IN: molecular_function unknown; INVOLVED IN: biological_process unknown; LOCATED IN: vacuole; CONTAINS InterPro DOMAIN/s: Protein of unknown function Cys-rich (InterPro:IPR006461); BEST Arabidopsis thaliana protein match is: PLANT CADMIUM RESISTANCE 2 (TAIR:AT1G14870.1); Has 778 Blast hits to 777 proteins in 111 species: Arch…	.	Yes										-1.15823	1.85937
		AT2G18193		P-loop containing nucleoside triphosphate hydrolases superfamily protein P-loop containing nucleoside triphosphate hydrolases superfamily protein; FUNCTIONS IN: nucleoside-triphosphatase activity, ATPase activity, nucleotide binding, ATP binding; LOCATED IN: endomembrane system; EXPRESSED IN: callus; CONTAINS InterPro DOMAIN/s: ATPase, AAA-type, core (InterPro:IPR003959), ATPase, AAA+ type, core …	.	Yes								5.13989			3.63176
		AT3G05890	RCI2B	Low temperature and salt responsive protein family RARE-COLD-INDUCIBLE 2B (RCI2B); CONTAINS InterPro DOMAIN/s: Uncharacterised protein family UPF0057 (InterPro:IPR000612); BEST Arabidopsis thaliana protein match is: Low temperature and salt responsive protein family (TAIR:AT3G05880.1); Has 1391 Blast hits to 1391 proteins in 471 species: Archae - 0; Bacteria - 653; Metazoa - 37; Fungi - 280; Plan…	.		Yes									-1.27815		-1.38159
		AT2G45220		Plant invertase/pectin methylesterase inhibitor superfamily Plant invertase/pectin methylesterase inhibitor superfamily; FUNCTIONS IN: enzyme inhibitor activity, pectinesterase activity; INVOLVED IN: cell wall modification; LOCATED IN: membrane, plant-type cell wall; EXPRESSED IN: 9 plant structures; EXPRESSED DURING: 4 anthesis, C globular stage, petal differentiation and expansion stage; CONTAI…	.		Yes							-3.93839	-3.0271	-1.8709	3.74571
		AT4G22080	RHS14	root hair specific 14 root hair specific 14 (RHS14); FUNCTIONS IN: lyase activity, pectate lyase activity; INVOLVED IN: biological_process unknown; LOCATED IN: endomembrane system; EXPRESSED IN: root hair; CONTAINS InterPro DOMAIN/s: Pectin lyase fold/virulence factor (InterPro:IPR011050), AmbAllergen (InterPro:IPR018082), Pectate lyase/Amb allergen (InterPro:IPR002022), Pectin lyase fold (InterP…	.		Yes	1.03831								-2.77749	1.26472	1.49917
		AT3G20810		2-oxoglutarate (2OG) and Fe(II)-dependent oxygenase superfamily protein 2-oxoglutarate (2OG) and Fe(II)-dependent oxygenase superfamily protein; CONTAINS InterPro DOMAIN/s: Transcription factor jumonji/aspartyl beta-hydroxylase (InterPro:IPR003347); BEST Arabidopsis thaliana protein match is: 2-oxoglutarate (2OG) and Fe(II)-dependent oxygenase superfamily protein (TAIR:AT5G19840.2); Has 35333 Bla…	.											-1.52825		1.1041
		AT4G34510	KCS17	3-ketoacyl-CoA synthase 17 Encodes KCS17, a member of the 3-ketoacyl-CoA synthase family involved in the biosynthesis of VLCFA (very long chain fatty acids). 3-ketoacyl-CoA synthase 17 (KCS17); FUNCTIONS IN: transferase activity, transferring acyl groups other than amino-acyl groups, catalytic activity, acyltransferase activity; INVOLVED IN: fatty acid elongation, very long-chain fatty acid metab…	.									2.60759			2.11368
		AT3G52310		ABC-2 type transporter family protein ABC-2 type transporter family protein; FUNCTIONS IN: ATPase activity, coupled to transmembrane movement of substances; LOCATED IN: plasma membrane; EXPRESSED IN: stem, stamen; EXPRESSED DURING: 4 anthesis; CONTAINS InterPro DOMAIN/s: ATPase, AAA+ type, core (InterPro:IPR003593), ABC transporter-like (InterPro:IPR003439), ABC-2 type transporter (InterPro:IPR01…	.											-1.00693	-2.5684
		AT5G24200		alpha/beta-Hydrolases superfamily protein alpha/beta-Hydrolases superfamily protein; FUNCTIONS IN: triglyceride lipase activity; INVOLVED IN: lipid metabolic process; LOCATED IN: cellular_component unknown; CONTAINS InterPro DOMAIN/s: Lipase, class 3 (InterPro:IPR002921); BEST Arabidopsis thaliana protein match is: alpha/beta-Hydrolases superfamily protein (TAIR:AT5G24210.1); Has 219 Blast hits t…	.									2.57891			1.80255
		AT4G11000		Ankyrin repeat family protein Ankyrin repeat family protein; CONTAINS InterPro DOMAIN/s: Ankyrin repeat-containing domain (InterPro:IPR020683), Ankyrin repeat (InterPro:IPR002110); BEST Arabidopsis thaliana protein match is: Ankyrin repeat family protein (TAIR:AT1G14480.2); Has 1807 Blast hits to 1807 proteins in 277 species: Archae - 0; Bacteria - 0; Metazoa - 736; Fungi - 347; Plants - 385; Vir…	.											-1.71005			1.45618
		AT1G10340		Ankyrin repeat family protein Ankyrin repeat family protein; CONTAINS InterPro DOMAIN/s: Ankyrin repeat-containing domain (InterPro:IPR020683), Ankyrin repeat (InterPro:IPR002110); BEST Arabidopsis thaliana protein match is: Ankyrin repeat family protein (TAIR:AT2G24600.4); Has 20842 Blast hits to 11682 proteins in 536 species: Archae - 22; Bacteria - 1442; Metazoa - 11586; Fungi - 1324; Plants -…	.			-1.64675								-1.03135	1.2321
		AT5G18270	ANAC087	Arabidopsis NAC domain containing protein 87 Arabidopsis NAC domain containing protein 87 (ANAC087); FUNCTIONS IN: sequence-specific DNA binding transcription factor activity; INVOLVED IN: multicellular organismal development, regulation of transcription; LOCATED IN: cellular_component unknown; EXPRESSED IN: 12 plant structures; EXPRESSED DURING: LP.06 six leaves visible, LP.04 four leaves visibl…	.									1.20486			1.1166
		AT4G26320	AGP13	arabinogalactan protein 13 arabinogalactan protein 13 (AGP13); BEST Arabidopsis thaliana protein match is: arabinogalactan protein 14 (TAIR:AT5G56540.1); Has 51 Blast hits to 51 proteins in 10 species: Archae - 0; Bacteria - 0; Metazoa - 0; Fungi - 0; Plants - 51; Viruses - 0; Other Eukaryotes - 0 (source: NCBI BLink). |	.									-2.1481		-2.89995	1.90291	-3.68682
		AT1G60190		ARM repeat superfamily protein ARM repeat superfamily protein; FUNCTIONS IN: ubiquitin-protein ligase activity, binding, zinc ion binding; INVOLVED IN: protein ubiquitination; LOCATED IN: ubiquitin ligase complex; EXPRESSED IN: 6 plant structures; EXPRESSED DURING: 4 anthesis, petal differentiation and expansion stage; CONTAINS InterPro DOMAIN/s: Zinc finger, RING-type (InterPro:IPR001841), U box…	.			-1.05513						-1.0264					-1.24611
		AT1G21525		AT1G21525.1 pseudogene pseudogene of unknown protein expressed protein |	.									2.49411			1.65762
		AT1G69140		AT1G69140.1 pseudogene pseudogene, hypothetical protein |	.											-1.5465		1.22175
		AT2G11780.1		AT2G11780.1 transposable_element_gene transposable element gene pseudogene, hypothetical protein |	.									6.47412			5.69961
		AT3G08885		AT3G08885.1 pseudogene pseudogene, ferritin, similar to ferritin GB:S71265 (Arabidopsis thaliana); blastp match of 48% identity and 2.0e-29 P-value to SP|Q96540|FRI1_BRANA Ferritin 1, chloroplast precursor. (Rape) {Brassica napus} |	.									-1.71685			-3.43822		-2.34346
		AT3G15536		AT3G15536.1 other_rna Unknown gene |	.									1.67239			1.30441		-1.47944
		AT5G35777.1		AT5G35777.1 transposable_element_gene transposable element gene copia-like retrotransposon family, has a 2.0e-67 P-value blast match to GB:CAA72989 open reading frame 1 (Ty1_Copia-element) (Brassica oleracea) |	.						-3.93693			-1.97395	-1.61381		-2.04964
		AT5G48250		B-box type zinc finger protein with CCT domain B-box type zinc finger protein with CCT domain; FUNCTIONS IN: sequence-specific DNA binding transcription factor activity, zinc ion binding; LOCATED IN: plasma membrane; EXPRESSED IN: 23 plant structures; EXPRESSED DURING: 13 growth stages; CONTAINS InterPro DOMAIN/s: CCT domain (InterPro:IPR010402), Zinc finger, B-box (InterPro:IPR000315); BEST Arab…	.											-1.5349		1.24194
		AT1G13650		BEST Arabidopsis thaliana protein match is: 18S pre-ribosomal assembly protein gar2-related (TAIR:AT2G03810.4); Has 3688 Blast hits to 1629 proteins in 255 species: Archae - 22; Bacteria - 222; Metazoa - 684; Fungi - 292; Plants - 62; Viruses - 14; Other Eukaryotes - 2392 (source: NCBI BLink). |	.											1.53763	-1.8103
		AT3G57240	BG3	beta-1,3-glucanase 3 encodes a member of glycosyl hydrolase family 17 "beta-1,3-glucanase 3" (BG3); FUNCTIONS IN: cellulase activity, hydrolase activity, hydrolyzing O-glycosyl compounds; INVOLVED IN: response to bacterium; LOCATED IN: apoplast, cell wall; EXPRESSED IN: 15 plant structures; EXPRESSED DURING: 9 growth stages; CONTAINS InterPro DOMAIN/s: Glycoside hydrolase, catalytic core (InterPr…	.											-1.68301	2.62014		2.61377
		AT5G07230		Bifunctional inhibitor/lipid-transfer protein/seed storage 2S albumin superfamily protein Bifunctional inhibitor/lipid-transfer protein/seed storage 2S albumin superfamily protein; FUNCTIONS IN: lipid binding; INVOLVED IN: lipid transport; LOCATED IN: endomembrane system; EXPRESSED IN: leaf whorl, sepal, flower, seed; EXPRESSED DURING: petal differentiation and expansion stage, E expanded cotyled…	.											-1.15315	1.08609
		AT3G61190	BAP1	BON association protein 1 Encodes a protein with a C2 domain that binds to BON1 in yeast two hybrid analyses. Its ability to bind to phospholipids is enhanced by calcium ions. Involved in maintaining cell homeostasis. BON association protein 1 (BAP1); FUNCTIONS IN: phospholipid binding, protein binding; INVOLVED IN: in 7 processes; LOCATED IN: membrane; EXPRESSED IN: 21 plant structures; EXPRESSE…	.						1.50334			-1.60948	-1.66948	-3.06364	1.53189
		AT4G21070	BRCA1	breast cancer susceptibility1 Encodes AtBRCA1, an ortholog of the human breast cancer susceptibility gene 1. Contains one N-terminal RING finger, two C-terminal BRCT and the p300/CBP interacting domain. Strongly induced by gamma rays, consistent with a putative role in DNA repair and in cell cycle control. breast cancer susceptibility1 (BRCA1); FUNCTIONS IN: ubiquitin-protein ligase activity; INV…	.									2.21255			1.24588
		AT5G39670		Calcium-binding EF-hand family protein Calcium-binding EF-hand family protein; FUNCTIONS IN: calcium ion binding; INVOLVED IN: biological_process unknown; LOCATED IN: cellular_component unknown; EXPRESSED IN: 21 plant structures; EXPRESSED DURING: 13 growth stages; CONTAINS InterPro DOMAIN/s: EF-Hand 1, calcium-binding site (InterPro:IPR018247), EF-HAND 2 (InterPro:IPR018249), EF-hand-like domain…	.			-1.54341		-1.00651						-1.07494			-1.1552
		AT1G70680		Caleosin-related family protein Caleosin-related family protein; CONTAINS InterPro DOMAIN/s: Caleosin related (InterPro:IPR007736); BEST Arabidopsis thaliana protein match is: Caleosin-related family protein (TAIR:AT1G70670.1); Has 342 Blast hits to 337 proteins in 61 species: Archae - 0; Bacteria - 0; Metazoa - 0; Fungi - 58; Plants - 281; Viruses - 0; Other Eukaryotes - 3 (source: NCBI BLink). |	.											-3.73081			-2.42658
		AT3G50770	CML41	calmodulin-like 41 calmodulin-like 41 (CML41); FUNCTIONS IN: calcium ion binding; INVOLVED IN: biological_process unknown; LOCATED IN: chloroplast; EXPRESSED IN: 17 plant structures; EXPRESSED DURING: 11 growth stages; CONTAINS InterPro DOMAIN/s: EF-Hand 1, calcium-binding site (InterPro:IPR018247), EF-HAND 2 (InterPro:IPR018249), EF-hand-like domain (InterPro:IPR011992), Calcium-binding EF-hand …	.											1.32241	-2.39466	-1.42931	-2.2886
		AT5G52300		CAP160 protein encodes a protein that is induced in expression in response to water deprivation such as cold, high-salt, and dessication. The response appears to be via abscisic acid. The promoter region contains two ABA-responsive elements (ABREs) that are required for the dehydration-responsive expression of rd29B as cis-acting elements. Protein is a member of a gene family with other members f…	.										2.08112		-5.48327	-2.44084	-5.50135
		AT1G07050		CCT motif family protein CCT motif family protein; CONTAINS InterPro DOMAIN/s: CCT domain (InterPro:IPR010402); BEST Arabidopsis thaliana protein match is: CCT motif family protein (TAIR:AT4G25990.1); Has 1772 Blast hits to 1772 proteins in 105 species: Archae - 0; Bacteria - 0; Metazoa - 1; Fungi - 2; Plants - 1711; Viruses - 0; Other Eukaryotes - 58 (source: NCBI BLink). |	.											-2.2452		1.75038
		AT1G21250	WAK1	cell wall-associated kinase cell wall-associated kinase, may function as a signaling receptor of extracellular matrix component such as oligogalacturonides. cell wall-associated kinase (WAK1); FUNCTIONS IN: kinase activity; INVOLVED IN: cell surface receptor linked signaling pathway, response to virus, defense response to fungus, response to salicylic acid stimulus; LOCATED IN: plasma membrane, v…	.			-1.8138		-1.29135						-1.11757	1.15559		1.11106
		AT4G24000		cellulose synthase like G2 encodes a protein similar to cellulose synthase cellulose synthase like G2 (CSLG2); FUNCTIONS IN: cellulose synthase activity, transferase activity, transferring glycosyl groups, transferase activity; INVOLVED IN: cellulose biosynthetic process, polysaccharide biosynthetic process; LOCATED IN: membrane; EXPRESSED IN: 19 plant structures; EXPRESSED DURING: 12 growth stag…	.			4.67048								-1.26232			-1.36125
		AT2G43570		chitinase, putative "chitinase, putative" (CHI); FUNCTIONS IN: chitin binding, chitinase activity; INVOLVED IN: carbohydrate metabolic process, cell wall macromolecule catabolic process; LOCATED IN: apoplast, plant-type cell wall; EXPRESSED IN: 15 plant structures; EXPRESSED DURING: 10 growth stages; CONTAINS InterPro DOMAIN/s: Chitin-binding, type 1, conserved site (InterPro:IPR018371), Glycosid…	.									1.85002			1.35431
		AT5G42900		cold regulated gene 27 cold regulated gene 27; BEST Arabidopsis thaliana protein match is: unknown protein (TAIR:AT4G33980.1); Has 74 Blast hits to 74 proteins in 12 species: Archae - 0; Bacteria - 0; Metazoa - 0; Fungi - 0; Plants - 74; Viruses - 0; Other Eukaryotes - 0 (source: NCBI BLink). |	.											-3.66765		2.07356
		AT3G07650	COL9	CONSTANS-like 9 This gene belongs to the CO (CONSTANS) gene family. This gene family is divided in three subgroups: groups III, to which COL9 belongs, is characterised by one B-box (supposed to regulate protein-protein interactions) and a second diverged zinc finger. COL9 downregulates expression of CO (CONSTANS) as well as FT and SOC1 which are known regulatory targets of CO. CONSTANS-like 9 (CO…	.											-1.89248		1.41905
		AT1G22480		Cupredoxin superfamily protein Cupredoxin superfamily protein; FUNCTIONS IN: electron carrier activity, copper ion binding; LOCATED IN: anchored to membrane; EXPRESSED IN: shoot apex, inflorescence meristem, embryo, flower, seed; EXPRESSED DURING: F mature embryo stage, petal differentiation and expansion stage, E expanded cotyledon stage, D bilateral stage; CONTAINS InterPro DOMAIN/s: Plastocyan…	.									-2.50196			3.77201
		AT4G39830		Cupredoxin superfamily protein Cupredoxin superfamily protein; FUNCTIONS IN: oxidoreductase activity, L-ascorbate oxidase activity, copper ion binding; INVOLVED IN: oxidation reduction; LOCATED IN: endomembrane system, extracellular region; EXPRESSED IN: 19 plant structures; EXPRESSED DURING: 12 growth stages; CONTAINS InterPro DOMAIN/s: Multicopper oxidase, type 3 (InterPro:IPR011707), Multicopp…	.											-1.41525	1.15838
		AT2G46440	CNGC11	cyclic nucleotide-gated channels Member of Cyclic nucleotide gated channel family. Positive regulator of resistance against avirulent fungal pathogen. cyclic nucleotide-gated channels (CNGC11); FUNCTIONS IN: ion channel activity, cyclic nucleotide binding, calmodulin binding, cation channel activity; INVOLVED IN: response to fungus; LOCATED IN: membrane; CONTAINS InterPro DOMAIN/s: Cyclic nucleot…	.											-1.04864	1.5876		1.66851
		AT3G60550	CYCP3;2	cyclin p3;2 cyclin p3;2 (CYCP3;2); CONTAINS InterPro DOMAIN/s: Negative regulatory factor PREG (InterPro:IPR012389), Cyclin-like (InterPro:IPR011028), Cyclin-related 2 (InterPro:IPR013922); BEST Arabidopsis thaliana protein match is: cyclin p3;1 (TAIR:AT2G45080.1); Has 1360 Blast hits to 1354 proteins in 218 species: Archae - 0; Bacteria - 18; Metazoa - 236; Fungi - 630; Plants - 217; Viruses - 0…	.									-1.53808		-1.88251	1.23236
		AT4G23150	CRK7	cysteine-rich RLK (RECEPTOR-like protein kinase) 7 Encodes a cysteine-rich receptor-like protein kinase. cysteine-rich RLK (RECEPTOR-like protein kinase) 7 (CRK7); FUNCTIONS IN: kinase activity; INVOLVED IN: protein amino acid phosphorylation; LOCATED IN: endomembrane system; EXPRESSED IN: 11 plant structures; EXPRESSED DURING: 9 growth stages; CONTAINS InterPro DOMAIN/s: Protein kinase, ATP bind…	.									1.01834					-1.36019
		AT1G01280	CYP703A2	cytochrome P450, family 703, subfamily A, polypeptide 2 member of CYP703A CYP703A2 is expressed specifically in anthers of land plants, catalyzing the in-chain hydroxylation at the C-7 position of medium-chain saturated fatty acids (lauric acid in-chain hydroxylase) which is involved in pollen development (sporopollenin synthesis). "cytochrome P450, family 703, subfamily A, polypeptide 2" (CYP703…	.											-1.64654	1.17278
		AT1G69500	CYP704B1	cytochrome P450, family 704, subfamily B, polypeptide 1 Encodes a cytochrome P450, designated CYP704B1. Expressed in the developing anthers. Essential for pollen exine development. Mutations in CYP704B1 result in impaired pollen walls that lack a normal exine layer and exhibit a characteristic striped surface, termed zebra phenotype. Heterologous expression of CYP704B1 in yeast cells demonstrated…	.											-1.22124	1.0674
		AT1G13608		Defensin-like (DEFL) family protein Encodes a defensin-like (DEFL) family protein. Defensin-like (DEFL) family protein; BEST Arabidopsis thaliana protein match is: Defensin-like (DEFL) family protein (TAIR:AT1G13609.1); Has 35333 Blast hits to 34131 proteins in 2444 species: Archae - 798; Bacteria - 22429; Metazoa - 974; Fungi - 991; Plants - 531; Viruses - 0; Other Eukaryotes - 9610 (source: NCB…	.									5.0324			9.6381
		AT5G66400		Dehydrin family protein Belongs to the dehydrin protein family, which contains highly conserved stretches of 7-17 residues that are repetitively scattered in their sequences, the K-, S-, Y- and lysine rich segments. ABA- and drought-induced glycine-rice dehydrin protein. The ABA-induced expression of RAB18 was reduced following ACC application, indicating that ethylene inhibits the ABA signaling …	.								3.66023		1.06236		-3.57967	-2.34105	-3.33107
		AT5G42800		dihydroflavonol 4-reductase dihydroflavonol reductase. Catalyzes the conversion of dihydroquercetin to leucocyanidin in the biosynthesis of anthocyanins. dihydroflavonol 4-reductase (DFR); CONTAINS InterPro DOMAIN/s: NAD-dependent epimerase/dehydratase (InterPro:IPR001509), NAD(P)-binding domain (InterPro:IPR016040); BEST Arabidopsis thaliana protein match is: NAD(P)-binding Rossmann-fold superfa…	.											1.04198	1.56744		-1.30645
		AT5G45000		Disease resistance protein (TIR-NBS-LRR class) family Disease resistance protein (TIR-NBS-LRR class) family; FUNCTIONS IN: transmembrane receptor activity; INVOLVED IN: signal transduction, defense response, innate immune response; LOCATED IN: intrinsic to membrane; EXPRESSED IN: 9 plant structures; EXPRESSED DURING: 7 growth stages; CONTAINS InterPro DOMAIN/s: Toll-Interleukin receptor (InterPro…	.											-1.80063	1.26143
		AT4G37420	DUF23	Domain of unknown function (DUF23) Domain of unknown function (DUF23); CONTAINS InterPro DOMAIN/s: Protein of unknown function DUF23 (InterPro:IPR008166); BEST Arabidopsis thaliana protein match is: Domain of unknown function (DUF23) (TAIR:AT5G40720.1); Has 241 Blast hits to 241 proteins in 76 species: Archae - 0; Bacteria - 129; Metazoa - 0; Fungi - 0; Plants - 86; Viruses - 0; Other Eukaryotes …	.									3.67909			3.94242
		AT5G37770	CML24	EF hand calcium-binding protein family Encodes a protein with 40% similarity to calmodulin. Binds Ca(2+) and, as a consequence, undergoes conformational changes. CML24 expression occurs in all major organs, and transcript levels are increased from 2- to 15-fold in plants subjected to touch, darkness, heat, cold, hydrogen peroxide, abscisic acid (ABA), and indole-3-acetic acid. However, CML24 prot…	.						1.39752					-1.30058	1.33257
		AT4G17490	ERF6	ethylene responsive element binding factor 6 Encodes a member of the ERF (ethylene response factor) subfamily B-3 of ERF/AP2 transcription factor family (ATERF-6). The protein contains one AP2 domain. There are 18 members in this subfamily including ATERF-1, ATERF-2, AND ATERF-5. ethylene responsive element binding factor 6 (ERF6); CONTAINS InterPro DOMAIN/s: DNA-binding, integrase-type (InterPro…	.									-1.53648	-1.37282	-3.38878	1.74931
		AT2G03200		Eukaryotic aspartyl protease family protein Eukaryotic aspartyl protease family protein; FUNCTIONS IN: aspartic-type endopeptidase activity; INVOLVED IN: proteolysis; LOCATED IN: endomembrane system; EXPRESSED IN: 10 plant structures; EXPRESSED DURING: 4 anthesis, C globular stage, petal differentiation and expansion stage; CONTAINS InterPro DOMAIN/s: Peptidase aspartic (InterPro:IPR021109), Pept…	.											-1.36956	2.01551
		AT4G16563		Eukaryotic aspartyl protease family protein Eukaryotic aspartyl protease family protein; FUNCTIONS IN: aspartic-type endopeptidase activity; INVOLVED IN: proteolysis; LOCATED IN: plant-type cell wall; EXPRESSED IN: 19 plant structures; EXPRESSED DURING: 11 growth stages; CONTAINS InterPro DOMAIN/s: Peptidase aspartic (InterPro:IPR021109), Peptidase aspartic, catalytic (InterPro:IPR009007), Peptid…	.											-1.25556	1.08222
		AT3G45960	EXLA3	expansin-like A3 member of EXPANSIN-LIKE. Naming convention from the Expansin Working Group (Kende et al, 2004. Plant Mol Bio) expansin-like A3 (EXLA3); INVOLVED IN: plant-type cell wall organization, unidimensional cell growth, plant-type cell wall loosening; LOCATED IN: membrane, plant-type cell wall; EXPRESSED IN: leaf apex, hypocotyl, root, flower, leaf; EXPRESSED DURING: petal differentiatio…	.			-1.16081							-1.35865	-2.42487	2.05773
		AT5G03545		Expressed in response to phosphate starvation, this response is enhanced by the presence of IAA. unknown protein; Has 7 Blast hits to 7 proteins in 2 species: Archae - 0; Bacteria - 0; Metazoa - 0; Fungi - 0; Plants - 7; Viruses - 0; Other Eukaryotes - 0 (source: NCBI BLink). |	.										1.13129		2.1649		1.10042
		AT3G20340		Expression of the gene is downregulated in the presence of paraquat, an inducer of photoxidative stress. FUNCTIONS IN: molecular_function unknown; INVOLVED IN: response to oxidative stress, N-terminal protein myristoylation; LOCATED IN: cellular_component unknown; EXPRESSED IN: 9 plant structures; EXPRESSED DURING: 4 anthesis, petal differentiation and expansion stage; Has 40 Blast hits to 40 pro…	.					-1.13727				-2.66284		-3.72027	-3.57509		-2.37858
		AT5G07610		F-box family protein F-box family protein; CONTAINS InterPro DOMAIN/s: F-box domain, cyclin-like (InterPro:IPR001810), F-box domain, Skp2-like (InterPro:IPR022364), F-box associated interaction domain (InterPro:IPR017451); BEST Arabidopsis thaliana protein match is: F-box family protein (TAIR:AT5G49610.1); Has 1807 Blast hits to 1807 proteins in 277 species: Archae - 0; Bacteria - 0; Metazoa - 73…	.									1.65238			1.2559
		AT1G23020	FRO3	ferric reduction oxidase 3 Encodes a ferric chelate reductase whose transcription is regulated by FIT1. Expressed in the root, shoot, flower and cotyledon. ferric reduction oxidase 3 (FRO3); FUNCTIONS IN: ferric-chelate reductase activity; INVOLVED IN: oxidation reduction; LOCATED IN: integral to membrane, membrane; EXPRESSED IN: 18 plant structures; EXPRESSED DURING: 9 growth stages; CONTAINS In…	.						1.14464			1.14517			3.61819		1.20606
		AT3G56090	FER3	ferritin 3 Encodes FERRITIN 3, AtFER3. Ferritins are a class of 24-mer multi-meric proteins found in all kingdoms of life. Function as the main iron store in mammals. Evidence suggests that Arabidopsis ferritins are essential to protect cells against oxidative damage, but they do not constitute the major iron pool. ferritin 3 (FER3); FUNCTIONS IN: oxidoreductase activity, ferric iron binding, bin…	.									-1.72357			-2.76429		-2.05597
		AT3G27060	TSO2	Ferritin/ribonucleotide reductase-like family protein Encodes one of the 3 ribonucleotide reductase (RNR) small subunit genes. TSO2 transcription occurs predominantly at the S-phase of the cell cycle and its expression pattern is consistent with its role in dNDP biosynthesis during DNA replication in actively dividing cells. Critical for cell cycle progression, DNA damage repair and plant develop…	.									1.45631			2.32726
		AT1G68050	FKF1	flavin-binding, kelch repeat, f box 1 Encodes FKF1, a flavin-binding kelch repeat F box protein, is clock-controlled, regulates transition to flowering. Forms a complex with GI on the CO promoter to regulate CO expression. "flavin-binding, kelch repeat, f box 1" (FKF1); FUNCTIONS IN: ubiquitin-protein ligase activity, signal transducer activity; INVOLVED IN: response to blue light, positive regul…	.											-1.73108		1.04865
		AT4G33980		FUNCTIONS IN: molecular_function unknown; INVOLVED IN: response to karrikin; LOCATED IN: cellular_component unknown; EXPRESSED IN: 24 plant structures; EXPRESSED DURING: 15 growth stages; BEST Arabidopsis thaliana protein match is: cold regulated gene 27 (TAIR:AT5G42900.3). |	.											-3.20772		1.98275
		AT3G28340	GATL10	galacturonosyltransferase-like 10 Encodes a protein with putative galacturonosyltransferase activity. galacturonosyltransferase-like 10 (GATL10); FUNCTIONS IN: transferase activity, transferring hexosyl groups, polygalacturonate 4-alpha-galacturonosyltransferase activity; INVOLVED IN: carbohydrate biosynthetic process; LOCATED IN: endomembrane system; EXPRESSED IN: 20 plant structures; EXPRESSED …	.									-1.57848	-1.13564	-1.98113	1.03438
		AT5G55490	GEX1	gamete expressed protein 1 Encodes a transmembrane domain containing protein that is expressed in pollen germ cells. gamete expressed protein 1 (GEX1); Has 7985 Blast hits to 6093 proteins in 809 species: Archae - 118; Bacteria - 1642; Metazoa - 3258; Fungi - 589; Plants - 254; Viruses - 18; Other Eukaryotes - 2106 (source: NCBI BLink). |	.									1.22739			1.11491
		AT5G24280	GMI1	gamma-irradiation and mitomycin c induced 1 GAMMA-IRRADIATION AND MITOMYCIN C INDUCED 1 (GMI1); BEST Arabidopsis thaliana protein match is: defective in meristem silencing 3 (TAIR:AT3G49250.1); Has 114 Blast hits to 102 proteins in 24 species: Archae - 0; Bacteria - 7; Metazoa - 8; Fungi - 4; Plants - 91; Viruses - 0; Other Eukaryotes - 4 (source: NCBI BLink). |	.									1.61383			2.09277
		AT4G30140	CDEF1	GDSL-like Lipase/Acylhydrolase superfamily protein Member of the GDSL lipase/esterase family of proteins that functions as cutinase. Expressed in pollen and at the zone of lateral root emergence. CUTICLE DESTRUCTING FACTOR 1 (CDEF1); FUNCTIONS IN: cutinase activity, carboxylesterase activity; INVOLVED IN: lipid metabolic process; LOCATED IN: extracellular space; EXPRESSED IN: 14 plant structures;…	.						1.21631					-1.13134	-1.2772	-1.15243
		AT1G02400	GA2OX6	gibberellin 2-oxidase 6 Encodes a gibberellin 2-oxidase that acts on C19 gibberellins but not C20 gibberellins. gibberellin 2-oxidase 6 (GA2OX6); CONTAINS InterPro DOMAIN/s: Oxoglutarate/iron-dependent oxygenase (InterPro:IPR005123); BEST Arabidopsis thaliana protein match is: gibberellin 2-oxidase 4 (TAIR:AT1G47990.1); Has 8143 Blast hits to 8109 proteins in 973 species: Archae - 0; Bacteria - 1…	.											-1.73958			1.69952
		AT3G57620		glyoxal oxidase-related protein glyoxal oxidase-related protein; FUNCTIONS IN: molecular_function unknown; INVOLVED IN: biological_process unknown; LOCATED IN: endomembrane system; EXPRESSED IN: leaf whorl, sepal, flower; EXPRESSED DURING: petal differentiation and expansion stage; CONTAINS InterPro DOMAIN/s: Galactose oxidase/kelch, beta-propeller (InterPro:IPR011043), Galactose oxidase, beta-pr…	.											-1.4052	1.03241
		AT1G09080		Heat shock protein 70 (Hsp 70) family protein BIP3; FUNCTIONS IN: ATP binding; INVOLVED IN: protein folding, response to heat, pollen tube growth; LOCATED IN: endoplasmic reticulum lumen; EXPRESSED IN: 10 plant structures; EXPRESSED DURING: 10 growth stages; CONTAINS InterPro DOMAIN/s: Heat shock protein 70, conserved site (InterPro:IPR018181), Heat shock protein Hsp70 (InterPro:IPR001023), Heat …	.						1.91553	1.80736				-1.82838			-1.83093
		AT3G48970		Heavy metal transport/detoxification superfamily protein Heavy metal transport/detoxification superfamily protein ; FUNCTIONS IN: copper ion binding, metal ion binding; INVOLVED IN: copper ion transport, metal ion transport; EXPRESSED IN: 16 plant structures; EXPRESSED DURING: 9 growth stages; CONTAINS InterPro DOMAIN/s: Heavy metal transport/detoxification protein (InterPro:IPR006121); BEST Arab…	.											-1.12232	1.00966	-1.04753
		AT5G59570		Homeodomain-like superfamily protein Homeodomain-like superfamily protein; CONTAINS InterPro DOMAIN/s: Homeodomain-like (InterPro:IPR009057), Myb, DNA-binding (InterPro:IPR014778), HTH transcriptional regulator, Myb-type, DNA-binding (InterPro:IPR017930), Myb-like DNA-binding domain, SHAQKYF class (InterPro:IPR006447), Homeodomain-related (InterPro:IPR012287); BEST Arabidopsis thaliana protein ma…	.											-1.39661	1.17255
		AT3G09600		Homeodomain-like superfamily protein Homeodomain-like superfamily protein; FUNCTIONS IN: DNA binding, sequence-specific DNA binding transcription factor activity; INVOLVED IN: in 9 processes; LOCATED IN: chloroplast; EXPRESSED IN: 22 plant structures; EXPRESSED DURING: 13 growth stages; CONTAINS InterPro DOMAIN/s: SANT, DNA-binding (InterPro:IPR001005), Homeodomain-like (InterPro:IPR009057), Myb,…	.											1.45099		-1.13304
		AT2G21650		Homeodomain-like superfamily protein RSM1 is a member of a small sub-family of single MYB transcription factors. Analysis of overexpressin lines indicate its involvement during early morphogenesis. MATERNAL EFFECT EMBRYO ARREST 3 (MEE3); CONTAINS InterPro DOMAIN/s: SANT, DNA-binding (InterPro:IPR001005), Molecular chaperone, heat shock protein, Hsp40, DnaJ (InterPro:IPR015609), Homeodomain-like (…	.											1.02085	-1.17409
		AT3G50480	HR4	homolog of RPW8 4 Homolog of RPW8 homolog of RPW8 4 (HR4); FUNCTIONS IN: molecular_function unknown; INVOLVED IN: response to other organism; LOCATED IN: endomembrane system; EXPRESSED IN: 20 plant structures; EXPRESSED DURING: 11 growth stages; CONTAINS InterPro DOMAIN/s: Powdery mildew resistance protein, RPW8 domain (InterPro:IPR008808); BEST Arabidopsis thaliana protein match is: homolog of R…	.			-1.04918								-1.00887	1.32879
		AT1G21910		Integrase-type DNA-binding superfamily protein encodes a member of the DREB subfamily A-5 of ERF/AP2 transcription factor family. The protein contains one AP2 domain. There are 15 members in this subfamily including RAP2.1, RAP2.9 and RAP2.10. Integrase-type DNA-binding superfamily protein; FUNCTIONS IN: DNA binding, sequence-specific DNA binding transcription factor activity; INVOLVED IN: regula…	.						2.29333			-1.30638	-1.03391	-1.75822	1.08234
		AT2G34600	JAZ7	jasmonate-zim-domain protein 7 jasmonate-zim-domain protein 7 (JAZ7); CONTAINS InterPro DOMAIN/s: Tify (InterPro:IPR010399); BEST Arabidopsis thaliana protein match is: jasmonate-zim-domain protein 8 (TAIR:AT1G30135.1); Has 38 Blast hits to 38 proteins in 7 species: Archae - 0; Bacteria - 0; Metazoa - 0; Fungi - 0; Plants - 38; Viruses - 0; Other Eukaryotes - 0 (source: NCBI BLink). |	.									-1.75023	-2.84498	-3.06812			2.41257
		AT3G11980	MS2	Jojoba acyl CoA reductase-related male sterility protein Similar to fatty acid reductases. MALE STERILITY 2 (MS2); FUNCTIONS IN: fatty-acyl-CoA reductase (alcohol-forming) activity, oxidoreductase activity, acting on the CH-CH group of donors, NAD or NADP as acceptor; INVOLVED IN: microsporogenesis, pollen exine formation; LOCATED IN: chloroplast; EXPRESSED IN: leaf whorl, sepal, flower; EXPRESSE…	.											-1.5295	1.2362
		AT5G05390	LAC12	laccase 12 putative laccase, a member of laccase family of genes (17 members in Arabidopsis). laccase 12 (LAC12); FUNCTIONS IN: laccase activity; INVOLVED IN: oxidation reduction, lignin catabolic process; LOCATED IN: endomembrane system, apoplast; EXPRESSED IN: 7 plant structures; EXPRESSED DURING: petal differentiation and expansion stage; CONTAINS InterPro DOMAIN/s: Multicopper oxidase, type 3…	.									-1.26196	-2.4625	-2.26639	3.34186	-2.65538
		AT1G51800		Leucine-rich repeat protein kinase family protein Leucine-rich repeat protein kinase family protein; FUNCTIONS IN: kinase activity; INVOLVED IN: protein amino acid phosphorylation; LOCATED IN: endomembrane system; EXPRESSED IN: 11 plant structures; EXPRESSED DURING: 6 growth stages; CONTAINS InterPro DOMAIN/s: Protein kinase, ATP binding site (InterPro:IPR017441), Protein kinase, catalytic domain…	.											-1.42641	1.3758		1.59895
		AT1G51790		Leucine-rich repeat protein kinase family protein Leucine-rich repeat protein kinase family protein; FUNCTIONS IN: kinase activity; INVOLVED IN: protein amino acid phosphorylation; LOCATED IN: endomembrane system; EXPRESSED IN: 9 plant structures; EXPRESSED DURING: 6 growth stages; CONTAINS InterPro DOMAIN/s: Protein kinase, catalytic domain (InterPro:IPR000719), Serine/threonine-protein kinase d…	.											-1.39517	1.33119		1.93378
		AT1G06280	LBD2	LOB domain-containing protein 2 LOB domain-containing protein 2 (LBD2); INVOLVED IN: biological_process unknown; LOCATED IN: chloroplast; CONTAINS InterPro DOMAIN/s: Lateral organ boundaries, LOB (InterPro:IPR004883); BEST Arabidopsis thaliana protein match is: Lateral organ boundaries (LOB) domain family protein (TAIR:AT1G65620.4); Has 899 Blast hits to 894 proteins in 25 species: Archae - 0; Ba…	.											-4.17415	2.5848	2.41073
		AT1G01560	MPK11	MAP kinase 11 member of MAP Kinase MAP kinase 11 (MPK11); FUNCTIONS IN: MAP kinase activity, kinase activity; INVOLVED IN: signal transduction, response to abscisic acid stimulus; LOCATED IN: cellular_component unknown; EXPRESSED IN: 22 plant structures; EXPRESSED DURING: 13 growth stages; CONTAINS InterPro DOMAIN/s: Protein kinase, ATP binding site (InterPro:IPR017441), Serine/threonine-protein …	.			-1.03261		-1.24482				-1.09826		-1.75009			1.15378
		AT5G52050		MATE efflux family protein MATE efflux family protein; FUNCTIONS IN: antiporter activity, drug transmembrane transporter activity; INVOLVED IN: drug transmembrane transport, transmembrane transport; LOCATED IN: membrane; EXPRESSED IN: 7 plant structures; EXPRESSED DURING: 7 growth stages; CONTAINS InterPro DOMAIN/s: Multi antimicrobial extrusion protein MatE (InterPro:IPR002528); BEST Arabidopsis…	.						1.64907			-2.788	-1.94952	-2.7754			1.64549
		AT2G41415		Maternally expressed gene (MEG) family protein Encodes a Maternally expressed gene (MEG) family protein Maternally expressed gene (MEG) family protein; LOCATED IN: endomembrane system; BEST Arabidopsis thaliana protein match is: Maternally expressed gene (MEG) family protein (TAIR:AT1G10747.1); Has 27 Blast hits to 27 proteins in 2 species: Archae - 0; Bacteria - 0; Metazoa - 0; Fungi - 0; Plants…	.											-1.8663	1.13933
		AT3G50060	MYB77	myb domain protein 77 Encodes a member of the R2R3 transcription factor gene family. Expressed in response to potassium deprivation and auxin. Involved in lateral root development. Interacts with ARF7 and regulates the expression of some auxin responsive genes. myb domain protein 77 (MYB77); CONTAINS InterPro DOMAIN/s: SANT, DNA-binding (InterPro:IPR001005), Homeodomain-like (InterPro:IPR009057),…	.			-1.38639								-1.11917	1.21381
		AT2G19800	MIOX2	myo-inositol oxygenase 2 Encodes a myo-inositol oxygenase family gene. myo-inositol oxygenase 2 (MIOX2); FUNCTIONS IN: inositol oxygenase activity; INVOLVED IN: syncytium formation; LOCATED IN: cytoplasm; EXPRESSED IN: 24 plant structures; EXPRESSED DURING: 14 growth stages; CONTAINS InterPro DOMAIN/s: Protein of unknown function DUF706 (InterPro:IPR007828); BEST Arabidopsis thaliana protein matc…	.									1.31961			1.66691		1.23482
		AT4G27410	RD26	NAC (No Apical Meristem) domain transcriptional regulator superfamily protein Encodes a NAC transcription factor induced in response to dessication. It is localized to the nucleus and acts as a transcriptional activator in ABA-mediated dehydration response. RESPONSIVE TO DESICCATION 26 (RD26); CONTAINS InterPro DOMAIN/s: No apical meristem (NAM) protein (InterPro:IPR003441); BEST Arabidopsis thal…	.									-1.15398			-1.15961
		AT2G46770	NST1	NAC (No Apical Meristem) domain transcriptional regulator superfamily protein NAC transcription factor NST1. NST1 and NST2 are redundant in regulating secondary wall thickening in anther walls and siliques. NST1 promoter was detected in various tissues in which lignified secondary walls develop. EMBRYO DEFECTIVE 2301 (EMB2301); CONTAINS InterPro DOMAIN/s: No apical meristem (NAM) protein (InterPr…	.											-1.6741	1.04448
		AT5G14490	NAC085	NAC domain containing protein 85 NAC domain containing protein 85 (NAC085); FUNCTIONS IN: sequence-specific DNA binding transcription factor activity; INVOLVED IN: multicellular organismal development, regulation of transcription; CONTAINS InterPro DOMAIN/s: No apical meristem (NAM) protein (InterPro:IPR003441); BEST Arabidopsis thaliana protein match is: NAC domain containing protein 44 (TAIR:AT…	.									4.51255			4.6633
		AT1G69490		NAC-like, activated by AP3/PI Encodes a member of the NAC transcription factor gene family. It is expressed in floral primordia and upregulated by AP3 and PI. Its expression is associated with leaf senescence. NAC-like, activated by AP3/PI (NAP); CONTAINS InterPro DOMAIN/s: No apical meristem (NAM) protein (InterPro:IPR003441); BEST Arabidopsis thaliana protein match is: NAC domain containing pro…	.					-1.05319				-2.00448			-2.55993		-1.77467
		AT1G09240	NAS3	nicotianamine synthase 3 Encodes a nicotianamine synthase. nicotianamine synthase 3 (NAS3); CONTAINS InterPro DOMAIN/s: Nicotianamine synthase (InterPro:IPR004298); BEST Arabidopsis thaliana protein match is: nicotianamine synthase 4 (TAIR:AT1G56430.1); Has 198 Blast hits to 195 proteins in 46 species: Archae - 20; Bacteria - 10; Metazoa - 0; Fungi - 20; Plants - 147; Viruses - 0; Other Eukaryote…	.									-3.19558			-4.37082	-1.11336	-3.14386
		AT3G25882	NIMIN-2	NIM1-interacting 2 encodes a kinase that physically interacts with NPR1/NIM1 NIM1-interacting 2 (NIMIN-2); Has 7 Blast hits to 7 proteins in 3 species: Archae - 0; Bacteria - 0; Metazoa - 0; Fungi - 0; Plants - 7; Viruses - 0; Other Eukaryotes - 0 (source: NCBI BLink). |	.			-1.74638		-1.52797						-1.2589	1.45424		1.2917
		AT2G04450	NUDT6	nudix hydrolase homolog 6 Encodes a protein with NADH pyrophosphatase activity. Although this protein was also shown to have ADP-ribose diphosphatase activity in vitro, mutant analyses suggest that NUDX6 is involved in NADH metabolism in vivo. nudix hydrolase homolog 6 (NUDT6); FUNCTIONS IN: hydrolase activity, ADP-ribose diphosphatase activity, NAD or NADH binding, NADH pyrophosphatase activity;…	.									1.02903			1.36319
		AT1G72110		O-acyltransferase (WSD1-like) family protein O-acyltransferase (WSD1-like) family protein; INVOLVED IN: biological_process unknown; LOCATED IN: cellular_component unknown; EXPRESSED IN: 7 plant structures; EXPRESSED DURING: 4 anthesis, C globular stage, F mature embryo stage, petal differentiation and expansion stage, D bilateral stage; CONTAINS InterPro DOMAIN/s: O-acyltransferase, WSD1, C-termi…	.											-1.405		-1.0902
		AT1G70640		octicosapeptide/Phox/Bem1p (PB1) domain-containing protein octicosapeptide/Phox/Bem1p (PB1) domain-containing protein; CONTAINS InterPro DOMAIN/s: Octicosapeptide/Phox/Bem1p (InterPro:IPR000270); BEST Arabidopsis thaliana protein match is: Octicosapeptide/Phox/Bem1p family protein (TAIR:AT3G26510.4); Has 386 Blast hits to 386 proteins in 18 species: Archae - 0; Bacteria - 0; Metazoa - 0; Fungi - …	.											-1.95998		1.49297
		AT1G65390	PP2-A5	phloem protein 2 A5 phloem protein 2 A5 (PP2-A5); FUNCTIONS IN: carbohydrate binding; INVOLVED IN: signal transduction, defense response, innate immune response; LOCATED IN: intrinsic to membrane, chloroplast; EXPRESSED IN: 21 plant structures; EXPRESSED DURING: 12 growth stages; CONTAINS InterPro DOMAIN/s: Toll-Interleukin receptor (InterPro:IPR000157); BEST Arabidopsis thaliana protein match is…	.									-1.61388		-1.51864			1.78438
		AT1G73010	PS2	phosphate starvation-induced gene 2 phosphate starvation-induced gene 2 (PS2); FUNCTIONS IN: phosphatase activity; INVOLVED IN: metabolic process; LOCATED IN: cellular_component unknown; EXPRESSED IN: 19 plant structures; EXPRESSED DURING: 10 growth stages; CONTAINS InterPro DOMAIN/s: Pyridoxal phosphate phosphatase, PHOSPHO2 (InterPro:IPR016965), HAD-superfamily hydrolase, subfamily IB, PSPase-l…	.											-1.23078	1.19472	-1.12921
		AT5G54490	PBP1	pinoid-binding protein 1 Encodes a PINOID (PID)-binding protein containing putative EF-hand calcium-binding motifs. The interaction is dependent on the presence of calcium. mRNA expression is up-regulated by auxin. Not a phosphorylation target of PID, likely acts upstream of PID to regulate the activity of this protein in response to changes in calcium levels. pinoid-binding protein 1 (PBP1); CON…	.			-1.53804						-1.17257		-1.84994	1.28927
		AT2G43050		Plant invertase/pectin methylesterase inhibitor superfamily ATPMEPCRD; FUNCTIONS IN: enzyme inhibitor activity, pectinesterase activity; INVOLVED IN: cell wall modification; LOCATED IN: cell wall, plant-type cell wall; EXPRESSED IN: 9 plant structures; EXPRESSED DURING: 4 anthesis, petal differentiation and expansion stage; CONTAINS InterPro DOMAIN/s: Pectinesterase, active site (InterPro:IPR0180…	.											-2.22947	2.42758	-2.39237
		AT2G18660		plant natriuretic peptide A Encodes PNP-A (Plant Natriuretic Peptide A). PNPs are a class of systemically mobile molecules distantly related to expansins; their biological role has remained elusive. PNP-A contains a signal peptide domain and is secreted into the extracellular space. Co-expression analyses using microarray data suggest that PNP-A may function as a component of plant defence respon…	.									1.61605			2.01201
		AT1G66100		Plant thionin Predicted to encode a PR (pathogenesis-related) protein. Belongs to the plant thionin (PR-13) family with the following members: At1g66100, At5g36910, At1g72260, At2g15010, At1g12663, At1g12660. Plant thionin; FUNCTIONS IN: toxin receptor binding; INVOLVED IN: defense response; LOCATED IN: endomembrane system; EXPRESSED IN: 10 plant structures; EXPRESSED DURING: 7 growth stages; CON…	.									-1.31046			-1.91153
		AT1G01680	PUB54	plant U-box 54 plant U-box 54 (PUB54); FUNCTIONS IN: ubiquitin-protein ligase activity; INVOLVED IN: response to stress, protein ubiquitination; LOCATED IN: ubiquitin ligase complex; CONTAINS InterPro DOMAIN/s: UspA (InterPro:IPR006016), U box domain (InterPro:IPR003613); BEST Arabidopsis thaliana protein match is: RING/U-box superfamily protein (TAIR:AT1G01660.1); Has 2251 Blast hits to 2122 pro…	.					-1.18098				3.08096			1.6771
		AT1G72520		PLAT/LH2 domain-containing lipoxygenase family protein PLAT/LH2 domain-containing lipoxygenase family protein; FUNCTIONS IN: oxidoreductase activity, acting on single donors with incorporation of molecular oxygen, incorporation of two atoms of oxygen, lipoxygenase activity, iron ion binding, metal ion binding; INVOLVED IN: growth, jasmonic acid biosynthetic process, response to wounding, defense …	.										-1.51853	-1.85395			1.23823
		AT2G37280	PDR5	pleiotropic drug resistance 5 pleiotropic drug resistance 5 (PDR5); FUNCTIONS IN: ATPase activity, coupled to transmembrane movement of substances; INVOLVED IN: drug transmembrane transport; LOCATED IN: plasma membrane; EXPRESSED IN: inflorescence meristem, hypocotyl, root, flower; EXPRESSED DURING: petal differentiation and expansion stage; CONTAINS InterPro DOMAIN/s: ATPase, AAA+ type, core (In…	.											-1.02179		-1.10629
		AT4G05380		P-loop containing nucleoside triphosphate hydrolases superfamily protein P-loop containing nucleoside triphosphate hydrolases superfamily protein; FUNCTIONS IN: nucleoside-triphosphatase activity, ATPase activity, nucleotide binding, ATP binding; INVOLVED IN: biological_process unknown; LOCATED IN: cellular_component unknown; CONTAINS InterPro DOMAIN/s: ATPase, AAA-type, core (InterPro:IPR003959)…	.									4.05805			3.77147
		AT4G02390		poly(ADP-ribose) polymerase Encodes a DNA dependent nuclear poly (ADP-ribose) polymerase (E.C.2.4.2.30), thought to be involved in post-translational modification . poly(ADP-ribose) polymerase (PP); FUNCTIONS IN: NAD+ ADP-ribosyltransferase activity, nucleic acid binding; INVOLVED IN: protein amino acid ADP-ribosylation; LOCATED IN: nucleus; EXPRESSED IN: 18 plant structures; EXPRESSED DURING: 13…	.									2.96086			2.00225
		AT5G25440		Protein kinase superfamily protein Protein kinase superfamily protein; FUNCTIONS IN: protein kinase activity, kinase activity, ATP binding; INVOLVED IN: protein amino acid phosphorylation, N-terminal protein myristoylation; LOCATED IN: nucleus, cytoplasm; EXPRESSED IN: 15 plant structures; EXPRESSED DURING: 9 growth stages; CONTAINS InterPro DOMAIN/s: Protein kinase, catalytic domain (InterPro:IP…	.											-1.1408	1.01142
		AT4G01140	DUF1191	Protein of unknown function (DUF1191) Protein of unknown function (DUF1191); FUNCTIONS IN: molecular_function unknown; INVOLVED IN: biological_process unknown; LOCATED IN: endomembrane system; EXPRESSED IN: inflorescence meristem, leaf whorl, root, flower; EXPRESSED DURING: 4 anthesis; CONTAINS InterPro DOMAIN/s: Protein of unknown function DUF1191 (InterPro:IPR010605); BEST Arabidopsis thaliana …	.											-2.01527	2.03174
		AT1G19380	DUF1195	Protein of unknown function (DUF1195) Protein of unknown function (DUF1195); CONTAINS InterPro DOMAIN/s: Protein of unknown function DUF1195 (InterPro:IPR010608); BEST Arabidopsis thaliana protein match is: Protein of unknown function (DUF1195) (TAIR:AT4G36660.1); Has 67 Blast hits to 67 proteins in 15 species: Archae - 0; Bacteria - 0; Metazoa - 0; Fungi - 0; Plants - 67; Viruses - 0; Other Euka…	.										-1.33329	-2.24355			1.1477
		AT2G40080	DUF1313	Protein of unknown function (DUF1313) Encodes a novel nuclear 111 amino-acid phytochrome-regulated component of a negative feedback loop involving the circadian clock central oscillator components CCA1 and LHY. ELF4 is necessary for light-induced expression of both CCA1 and LHY, and conversely, CCA1 and LHY act negatively on light-induced ELF4 expression. ELF4 promotes clock accuracy and is requi…	.											-1.71716		1.38058
		AT1G12030	DUF506	Protein of unknown function (DUF506) Protein of unknown function (DUF506) ; CONTAINS InterPro DOMAIN/s: Protein of unknown function DUF506, plant (InterPro:IPR006502); BEST Arabidopsis thaliana protein match is: Protein of unknown function (DUF506) (TAIR:AT1G62420.1); Has 393 Blast hits to 391 proteins in 26 species: Archae - 0; Bacteria - 4; Metazoa - 0; Fungi - 0; Plants - 387; Viruses - 0; Oth…	.			2.90647			4.72921			2.49966			6.0497
		AT4G22960	DUF544	Protein of unknown function (DUF544) Protein of unknown function (DUF544) ; CONTAINS InterPro DOMAIN/s: Protein of unknown function DUF544 (InterPro:IPR007518); BEST Arabidopsis thaliana protein match is: Protein of unknown function (DUF544) (TAIR:AT4G11860.1); Has 737 Blast hits to 425 proteins in 174 species: Archae - 0; Bacteria - 23; Metazoa - 282; Fungi - 261; Plants - 75; Viruses - 0; Other…	.									2.53446			1.87612
		AT3G28270	DUF677	Protein of unknown function (DUF677) Protein of unknown function (DUF677); CONTAINS InterPro DOMAIN/s: Protein of unknown function DUF677 (InterPro:IPR007749); BEST Arabidopsis thaliana protein match is: Protein of unknown function (DUF677) (TAIR:AT3G28290.1); Has 636 Blast hits to 621 proteins in 191 species: Archae - 37; Bacteria - 189; Metazoa - 134; Fungi - 25; Plants - 165; Viruses - 1; Othe…	.									1.00162	1.4738			-1.05981	-1.52254
		AT1G74450	DUF793	Protein of unknown function (DUF793) FUNCTIONS IN: molecular_function unknown; INVOLVED IN: biological_process unknown; EXPRESSED IN: 24 plant structures; EXPRESSED DURING: 14 growth stages; CONTAINS InterPro DOMAIN/s: Protein BYPASS related (InterPro:IPR008511); BEST Arabidopsis thaliana protein match is: Protein of unknown function (DUF793) (TAIR:AT1G18740.1); Has 215 Blast hits to 212 proteins…	.									-1.14559	-1.13803	-1.40945	1.14954
		AT1G74440	DUF962	Protein of unknown function (DUF962) Protein of unknown function (DUF962); CONTAINS InterPro DOMAIN/s: Protein of unknown function DUF962 (InterPro:IPR009305); BEST Arabidopsis thaliana protein match is: Protein of unknown function (DUF962) (TAIR:AT1G18720.1); Has 608 Blast hits to 608 proteins in 290 species: Archae - 0; Bacteria - 318; Metazoa - 3; Fungi - 143; Plants - 86; Viruses - 0; Other E…	.											-1.09879			1.08313
		AT1G02813	DUF538	Protein of unknown function, DUF538 Protein of unknown function, DUF538; INVOLVED IN: biological_process unknown; LOCATED IN: endomembrane system; EXPRESSED IN: leaf whorl, cauline leaf, sepal, flower, seed; EXPRESSED DURING: F mature embryo stage, petal differentiation and expansion stage, E expanded cotyledon stage; CONTAINS InterPro DOMAIN/s: Protein of unknown function DUF538 (InterPro:IPR007…	.											-1.78516	1.20968
		AT3G62430		Protein with RNI-like/FBD-like domains Protein with RNI-like/FBD-like domains; CONTAINS InterPro DOMAIN/s: F-box domain, cyclin-like (InterPro:IPR001810), FBD-like (InterPro:IPR006566), Leucine-rich repeat 2 (InterPro:IPR013101); BEST Arabidopsis thaliana protein match is: RNI-like superfamily protein (TAIR:AT3G54160.1); Has 1224 Blast hits to 1202 proteins in 12 species: Archae - 0; Bacteria - 0…	.									1.80627			1.84396
		AT1G34060		Pyridoxal phosphate (PLP)-dependent transferases superfamily protein Pyridoxal phosphate (PLP)-dependent transferases superfamily protein; FUNCTIONS IN: carbon-sulfur lyase activity, pyridoxal phosphate binding, catalytic activity; LOCATED IN: endomembrane system; CONTAINS InterPro DOMAIN/s: Pyridoxal phosphate-dependent transferase, major domain (InterPro:IPR015424), EGF-like, alliinase (InterPr…	.									-1.17542					-1.23553
		AT1G68840	RAV2	related to ABI3/VP1 2 Rav2 is part of a complex that has been named `regulator of the (H+)-ATPase of the vacuolar and endosomal membranes' (RAVE) related to ABI3/VP1 2 (RAV2); FUNCTIONS IN: transcription repressor activity, DNA binding, sequence-specific DNA binding transcription factor activity; INVOLVED IN: regulation of transcription, DNA-dependent; LOCATED IN: chloroplast; EXPRESSED IN: 11 pl…	.									-1.61551	-1.17929			-1.0425
		AT4G19130		Replication factor-A protein 1-related Replication factor-A protein 1-related; FUNCTIONS IN: DNA binding, zinc ion binding, nucleic acid binding; INVOLVED IN: DNA replication; LOCATED IN: nucleus; EXPRESSED IN: sperm cell, flower; EXPRESSED DURING: petal differentiation and expansion stage; CONTAINS InterPro DOMAIN/s: Replication factor-a protein 1 Rpa1 (InterPro:IPR004591), Nucleic acid-binding,…	.									1.80191			1.44894
		AT3G07195	RIN4	RPM1-interacting protein 4 (RIN4) family protein RPM1-interacting protein 4 (RIN4) family protein; CONTAINS InterPro DOMAIN/s: RPM1-interacting protein 4, defence response (InterPro:IPR008700); BEST Arabidopsis thaliana protein match is: defense protein-related (TAIR:AT5G48657.2); Has 4930 Blast hits to 4046 proteins in 465 species: Archae - 6; Bacteria - 1879; Metazoa - 1598; Fungi - 263; Plants…	.											-1.20067	1.4711		1.96446
		AT5G51010		Rubredoxin-like superfamily protein Rubredoxin-like superfamily protein; FUNCTIONS IN: electron carrier activity, metal ion binding; EXPRESSED IN: 22 plant structures; EXPRESSED DURING: 13 growth stages; CONTAINS InterPro DOMAIN/s: Rubredoxin-type Fe(Cys)4 protein (InterPro:IPR004039); BEST Arabidopsis thaliana protein match is: rubredoxin family protein (TAIR:AT5G17170.1); Has 30201 Blast hits t…	.									-1.03494			-2.8208		-1.22213
		AT5G37970		S-adenosyl-L-methionine-dependent methyltransferases superfamily protein S-adenosyl-L-methionine-dependent methyltransferases superfamily protein; FUNCTIONS IN: S-adenosylmethionine-dependent methyltransferase activity, methyltransferase activity; INVOLVED IN: biological_process unknown; EXPRESSED IN: 6 plant structures; EXPRESSED DURING: M germinated pollen stage, 4 anthesis, petal differentiati…	.										1.29204		1.20747
		AT5G45890	SAG12	senescence-associated gene 12 Senescence-associated gene 12 (SAG12) encoding a cysteine protease influenced by cytokinin, auxin, and sugars.Localized to special vacuole found during senescence called senescence associated vacuoles which are different from central vacuole in the tonoplast composition and pH. senescence-associated gene 12 (SAG12); CONTAINS InterPro DOMAIN/s: Peptidase C1A, papain (…	.									-7.68037	-6.23292	-9.41489	-3.34531	-9.74487	-7.08354
		AT5G62520	SRO5	similar to RCD one 5 Encodes a protein with similarity to RCD1 but without the WWE domain. The protein does have a PARP signature upstream of the C-terminal protein interaction domain. The PARP signature may bind NAD+ and attach the ADP-ribose-moiety from NAD+ to the target molecule. Its presence suggests a role for the protein in ADP ribosylation. Up-regulated by NaCl. SRO5 and P5CDH (an overlap…	.						4.31756	2.0522		-2.03712	-2.12769	-4.83068			2.96474
		AT4G16740		terpene synthase 03 Encodes an (E,E)-alpha-farnesene synthase in the Col ecotype of Arabidopsis. This enzyme can also catalyze the formation of (E)-beta-ocimene as well as trace amounts of myrcene and other related compounds in vitro. The cytosolic localization of the protein may make it favor (E,E)-alpha-farnesene biosynthesis because the precursor of this product, FPP, is primarily cytosolic. T…	.											-1.18414	-1.44561	1.20584
		AT2G47870		Thioredoxin superfamily protein Thioredoxin superfamily protein; FUNCTIONS IN: electron carrier activity, protein disulfide oxidoreductase activity; INVOLVED IN: cell redox homeostasis; LOCATED IN: endomembrane system; CONTAINS InterPro DOMAIN/s: Glutaredoxin-like, plant II (InterPro:IPR011905), Thioredoxin fold (InterPro:IPR012335), Glutaredoxin (InterPro:IPR002109), Thioredoxin-like fold (Inter…	.											-1.69002	-1.66369
		AT3G07800		Thymidine kinase Thymidine kinase; FUNCTIONS IN: thymidine kinase activity, ATP binding; INVOLVED IN: pyrimidine deoxyribonucleoside interconversion, anaerobic respiration; LOCATED IN: cellular_component unknown; EXPRESSED IN: 23 plant structures; EXPRESSED DURING: 13 growth stages; CONTAINS InterPro DOMAIN/s: Thymidine kinase (InterPro:IPR001267), Thymidine kinase, conserved site (InterPro:IPR02…	.									1.67592			1.14443
		AT1G72910		Toll-Interleukin-Resistance (TIR) domain-containing protein Toll-Interleukin-Resistance (TIR) domain-containing protein; FUNCTIONS IN: transmembrane receptor activity, ATP binding; INVOLVED IN: signal transduction, defense response, apoptosis, innate immune response; LOCATED IN: intrinsic to membrane; CONTAINS InterPro DOMAIN/s: NB-ARC (InterPro:IPR002182), Toll-Interleukin receptor (InterPro:IPR…	.											-2.17426	1.36087
		AT2G36780		UDP-Glycosyltransferase superfamily protein UDP-Glycosyltransferase superfamily protein; FUNCTIONS IN: UDP-glycosyltransferase activity, transferase activity, transferring glycosyl groups; INVOLVED IN: metabolic process; LOCATED IN: cellular_component unknown; CONTAINS InterPro DOMAIN/s: UDP-glucuronosyl/UDP-glucosyltransferase (InterPro:IPR002213); BEST Arabidopsis thaliana protein match is: UDP…	.									2.48181			2.62916
		AT2G36970		UDP-Glycosyltransferase superfamily protein UDP-Glycosyltransferase superfamily protein; FUNCTIONS IN: UDP-glycosyltransferase activity, transferase activity, transferring glycosyl groups; INVOLVED IN: metabolic process; LOCATED IN: endomembrane system; EXPRESSED IN: 20 plant structures; EXPRESSED DURING: 13 growth stages; CONTAINS InterPro DOMAIN/s: UDP-glucuronosyl/UDP-glucosyltransferase (Inte…	.									1.00089			1.32044
		AT3G23170		unknown protein; BEST Arabidopsis thaliana protein match is: unknown protein (TAIR:AT4G14450.1); Has 74 Blast hits to 74 proteins in 6 species: Archae - 0; Bacteria - 0; Metazoa - 0; Fungi - 0; Plants - 74; Viruses - 0; Other Eukaryotes - 0 (source: NCBI BLink). |	.						1.46921			-1.39769			-2.01283		-1.0982
		AT3G27630		unknown protein; BEST Arabidopsis thaliana protein match is: unknown protein (TAIR:AT5G40460.1); Has 36 Blast hits to 36 proteins in 6 species: Archae - 0; Bacteria - 0; Metazoa - 0; Fungi - 0; Plants - 36; Viruses - 0; Other Eukaryotes - 0 (source: NCBI BLink). |	.									4.21758			3.31538
		AT1G32570		unknown protein; FUNCTIONS IN: molecular_function unknown; INVOLVED IN: biological_process unknown; LOCATED IN: cellular_component unknown; Has 30201 Blast hits to 17322 proteins in 780 species: Archae - 12; Bacteria - 1396; Metazoa - 17338; Fungi - 3422; Plants - 5037; Viruses - 0; Other Eukaryotes - 2996 (source: NCBI BLink). |	.									3.30518			2.00306
		AT1G58225		unknown protein; FUNCTIONS IN: molecular_function unknown; INVOLVED IN: biological_process unknown; LOCATED IN: endomembrane system. |	.											-1.22344			-1.19691
		AT5G03210		unknown protein; FUNCTIONS IN: molecular_function unknown; INVOLVED IN: biological_process unknown; LOCATED IN: endomembrane system; EXPRESSED IN: 11 plant structures; EXPRESSED DURING: 7 growth stages; Has 6 Blast hits to 6 proteins in 2 species: Archae - 0; Bacteria - 0; Metazoa - 0; Fungi - 0; Plants - 6; Viruses - 0; Other Eukaryotes - 0 (source: NCBI BLink). |	.											-1.16389	-1.52731		-1.29251
		AT1G17665		unknown protein; FUNCTIONS IN: molecular_function unknown; INVOLVED IN: biological_process unknown; LOCATED IN: endomembrane system; EXPRESSED IN: 15 plant structures; EXPRESSED DURING: 11 growth stages; Has 149 Blast hits to 146 proteins in 39 species: Archae - 0; Bacteria - 4; Metazoa - 21; Fungi - 5; Plants - 30; Viruses - 0; Other Eukaryotes - 89 (source: NCBI BLink). |	.											-2.6536		1.53087
		AT1G68875		unknown protein; FUNCTIONS IN: molecular_function unknown; INVOLVED IN: biological_process unknown; LOCATED IN: endomembrane system; EXPRESSED IN: petal, leaf whorl, sepal, flower, stamen; EXPRESSED DURING: 4 anthesis, petal differentiation and expansion stage; Has 4 Blast hits to 4 proteins in 2 species: Archae - 0; Bacteria - 0; Metazoa - 0; Fungi - 0; Plants - 4; Viruses - 0; Other Eukaryotes …	.											-1.25608	1.05694
		AT5G38700		unknown protein; FUNCTIONS IN: molecular_function unknown; INVOLVED IN: biological_process unknown; LOCATED IN: mitochondrion; EXPRESSED IN: 10 plant structures; EXPRESSED DURING: LP.04 four leaves visible, LP.10 ten leaves visible, petal differentiation and expansion stage, LP.08 eight leaves visible, LP.12 twelve leaves visible; BEST Arabidopsis thaliana protein match is: unknown protein (TAIR:…	.						2.77729					-5.77725			3.98599
		AT2G38465		unknown protein; FUNCTIONS IN: molecular_function unknown; INVOLVED IN: biological_process unknown; LOCATED IN: plasma membrane; EXPRESSED IN: 21 plant structures; EXPRESSED DURING: 11 growth stages; Has 16 Blast hits to 16 proteins in 8 species: Archae - 0; Bacteria - 0; Metazoa - 0; Fungi - 0; Plants - 16; Viruses - 0; Other Eukaryotes - 0 (source: NCBI BLink). |	.					-1.51471						-1.11857	-1.25153
		AT4G25330		unknown protein; Has 21 Blast hits to 21 proteins in 10 species: Archae - 0; Bacteria - 0; Metazoa - 0; Fungi - 0; Plants - 21; Viruses - 0; Other Eukaryotes - 0 (source: NCBI BLink). |	.									7.95497			3.82417
		AT4G33467		unknown protein; Has 25 Blast hits to 25 proteins in 9 species: Archae - 0; Bacteria - 0; Metazoa - 0; Fungi - 0; Plants - 25; Viruses - 0; Other Eukaryotes - 0 (source: NCBI BLink). |	.			3.81728						-1.49053		-1.10768	-2.16214		-1.18685
		AT3G45730		unknown protein; Has 3 Blast hits to 3 proteins in 1 species: Archae - 0; Bacteria - 0; Metazoa - 0; Fungi - 0; Plants - 3; Viruses - 0; Other Eukaryotes - 0 (source: NCBI BLink). |	.									1.79599			1.73081
		AT2G35290		unknown protein; Has 39 Blast hits to 39 proteins in 10 species: Archae - 0; Bacteria - 0; Metazoa - 0; Fungi - 0; Plants - 39; Viruses - 0; Other Eukaryotes - 0 (source: NCBI BLink). |	.											-1.93458	1.21552
		AT1G07500		unknown protein; Has 4 Blast hits to 4 proteins in 3 species: Archae - 0; Bacteria - 0; Metazoa - 0; Fungi - 0; Plants - 4; Viruses - 0; Other Eukaryotes - 0 (source: NCBI BLink). |	.									2.919			5.08683
		AT1G22230		unknown protein; LOCATED IN: chloroplast; BEST Arabidopsis thaliana protein match is: unknown protein (TAIR:AT1G78110.1); Has 2358 Blast hits to 1759 proteins in 159 species: Archae - 2; Bacteria - 36; Metazoa - 1046; Fungi - 203; Plants - 157; Viruses - 72; Other Eukaryotes - 842 (source: NCBI BLink). |	.											-1.44032	1.02915
		AT3G59370		Vacuolar calcium-binding protein-related Vacuolar calcium-binding protein-related; Has 1012 Blast hits to 386 proteins in 97 species: Archae - 12; Bacteria - 133; Metazoa - 361; Fungi - 73; Plants - 75; Viruses - 49; Other Eukaryotes - 309 (source: NCBI BLink). |	.											-2.82622	1.60993
		AT1G76800		Vacuolar iron transporter (VIT) family protein Vacuolar iron transporter (VIT) family protein; CONTAINS InterPro DOMAIN/s: Protein of unknown function DUF125, transmembrane (InterPro:IPR008217); BEST Arabidopsis thaliana protein match is: Vacuolar iron transporter (VIT) family protein (TAIR:AT3G43660.1); Has 1790 Blast hits to 1779 proteins in 610 species: Archae - 82; Bacteria - 1205; Metazoa - …	.						-1.49628			-1.72057			-2.5472		-2.08253
		AT5G24110	WRKY30	WRKY DNA-binding protein 30 member of WRKY Transcription Factor; Group III WRKY DNA-binding protein 30 (WRKY30); FUNCTIONS IN: sequence-specific DNA binding transcription factor activity; INVOLVED IN: regulation of transcription, DNA-dependent, regulation of transcription; EXPRESSED IN: stem, stamen; EXPRESSED DURING: 4 anthesis; CONTAINS InterPro DOMAIN/s: DNA-binding WRKY (InterPro:IPR003657); …	.									-1.81526		-3.01844	-1.52571		-2.93243
		AT5G48720	XRI1	x-ray induced transcript 1 Encodes XRI1 (X-ray induced 1). Required for post-meiotic stages of pollen development and male and female meiosis. Maybe required for meiotic DNA repair. Inducible by X-ray. Homozygous xri1 mutants are sterile due to extensive chromosome fragmentation. X-RAY INDUCED TRANSCRIPT 1 (XRI1); FUNCTIONS IN: molecular_function unknown; INVOLVED IN: DNA repair, female meiosis, …	.									1.79086			1.05616
		AT4G14130	XTH15	xyloglucan endotransglucosylase/hydrolase 15 xyloglucan endotransglycosylase-related protein (XTR7) xyloglucan endotransglucosylase/hydrolase 15 (XTH15); FUNCTIONS IN: hydrolase activity, acting on glycosyl bonds, xyloglucan:xyloglucosyl transferase activity, hydrolase activity, hydrolyzing O-glycosyl compounds; INVOLVED IN: N-terminal protein myristoylation, carbohydrate metabolic process, cellu…	.											-1.01772	1.09601	-1.15768
		AT4G30280	XTH18	xyloglucan endotransglucosylase/hydrolase 18 Encodes a xyloglucan endotransglucosylase/hydrolase with only only the endotransglucosylase (XET; EC 2.4.1.207) activity towards xyloglucan and non-detectable endohydrolytic (XEH; EC 3.2.1.151) activity. Expressed in the mature or basal regions of both the main and lateral roots, but not in the tip of these roots where cell division occurs. xyloglucan …	.									-1.39619	-2.57473	-3.44385	2.54978		3.42272
		AT5G57550	XTH25	xyloglucan endotransglucosylase/hydrolase 25 xyloglucan endotransglycosylase-related protein (XTR3) xyloglucan endotransglucosylase/hydrolase 25 (XTH25); FUNCTIONS IN: hydrolase activity, acting on glycosyl bonds, xyloglucan:xyloglucosyl transferase activity; INVOLVED IN: plant-type cell wall biogenesis; LOCATED IN: endomembrane system, cell wall, apoplast; EXPRESSED IN: 9 plant structures; EXPRE…	.											-1.58431	1.40329		2.07268
		AT4G24120	YSL1	YELLOW STRIPE like 1 Member of a small family of oligopeptide transporters similar to the yellow stripe locus of maize (ZmYS1). YELLOW STRIPE like 1 (YSL1); CONTAINS InterPro DOMAIN/s: Oligopeptide transporter OPT superfamily (InterPro:IPR004813); BEST Arabidopsis thaliana protein match is: YELLOW STRIPE like 3 (TAIR:AT5G53550.2); Has 1803 Blast hits to 1757 proteins in 564 species: Archae - 19; …	.			-1.80747						-1.08451			-2.60049		-1.15912
		AT5G60250		zinc finger (C3HC4-type RING finger) family protein zinc finger (C3HC4-type RING finger) family protein; FUNCTIONS IN: zinc ion binding, nucleic acid binding; EXPRESSED IN: 14 plant structures; EXPRESSED DURING: 8 growth stages; CONTAINS InterPro DOMAIN/s: Zinc finger, RING-type, conserved site (InterPro:IPR017907), Zinc finger, C6HC-type (InterPro:IPR002867), Zinc finger, RING-type (InterPro:IPR…	.									2.06727			1.93532
		AT1G68200		Zinc finger C-x8-C-x5-C-x3-H type family protein Zinc finger C-x8-C-x5-C-x3-H type family protein; CONTAINS InterPro DOMAIN/s: Zinc finger, CCCH-type (InterPro:IPR000571); BEST Arabidopsis thaliana protein match is: Zinc finger C-x8-C-x5-C-x3-H type family protein (TAIR:AT1G66810.1); Has 1170 Blast hits to 1062 proteins in 230 species: Archae - 0; Bacteria - 0; Metazoa - 455; Fungi - 97; Plants -…	.											-1.3212	2.43107

## Sheet: Table S3
Table S3. Enriched gene ontology (GO) terms in Fe-Cu crosstalk-related genes from central Venn diagram in Fig. 4 based on DAVID functional annotation clustering.
Roots
	Category
		Gene Group 1	Enrichment Score: 5.752947748179933
		TAIR_ID	Gene Name
Lipid Transport	BP	AT4G12360	Bifunctional inhibitor/lipid-transfer protein/seed storage 2S albumin superfamily protein(AT4G12360)
Lipid Transport	BP	AT5G13900	Bifunctional inhibitor/lipid-transfer protein/seed storage 2S albumin superfamily protein(AT5G13900)
Lipid Transport	BP	AT3G43720	Bifunctional inhibitor/lipid-transfer protein/seed storage 2S albumin superfamily protein(LTPG2)
Lipid Transport	BP	AT5G41290	Receptor-like protein kinase-related family protein(AT5G41290)
Lipid Transport	BP	AT5G41280	Receptor-like protein kinase-related family protein(AT5G41280)
Lipid Transport	BP	AT4G12480	Bifunctional inhibitor/lipid-transfer protein/seed storage 2S albumin superfamily protein(EARLI1)
Lipid Transport	BP	AT1G55260	Bifunctional inhibitor/lipid-transfer protein/seed storage 2S albumin superfamily protein(AT1G55260)
Lipid Transport	BP	AT2G20520	FASCICLIN-like arabinogalactan 6(FLA6)
Lipid Transport	BP	AT1G27950	glycosylphosphatidylinositol-anchored lipid protein transfer 1(LTPG1)
Lipid Transport	BP	AT2G38540	lipid transfer protein 1(LP1)
Lipid Transport	BP	AT3G51600	lipid transfer protein 5(LTP5)
Lipid Transport	BP	AT5G01870	Bifunctional inhibitor/lipid-transfer protein/seed storage 2S albumin superfamily protein(AT5G01870)
Lipid Transport	BP	AT5G59310	lipid transfer protein 4(LTP4)
		Gene Group 2	Enrichment Score: 5.527414059958235
		TAIR_ID	Gene Name
Oxalate metaboloic process	BP	AT1G09560	germin-like protein 5(GLP5)
Oxalate metaboloic process	BP	AT5G39130	RmlC-like cupins superfamily protein(AT5G39130)
Oxalate metaboloic process	BP	AT5G39120	RmlC-like cupins superfamily protein(AT5G39120)
Oxalate metaboloic process	BP	AT5G38910	RmlC-like cupins superfamily protein(AT5G38910)
Oxalate metaboloic process	BP	AT5G39190	germin-like protein 2(GER2)
Oxalate metaboloic process	BP	AT5G39180	RmlC-like cupins superfamily protein(AT5G39180)
Oxalate metaboloic process	BP	AT5G39160	RmlC-like cupins superfamily protein(AT5G39160)
		Gene Group 3	Enrichment Score: 5.119059077401148
		TAIR_ID	Gene Name
Oxidation-reduction process	BP	AT5G59540	2-oxoglutarate (2OG) and Fe(II)-dependent oxygenase superfamily protein(AT5G59540)
Oxidation-reduction process	BP	AT1G52820	2-oxoglutarate (2OG) and Fe(II)-dependent oxygenase superfamily protein(AT1G52820)
Oxidation-reduction process	BP	AT3G12900	2-oxoglutarate (2OG) and Fe(II)-dependent oxygenase superfamily protein(AT3G12900)
Oxidation-reduction process	BP	AT3G55970	jasmonate-regulated gene 21(JRG21)
Oxidation-reduction process	BP	AT3G49620	2-oxoglutarate (2OG) and Fe(II)-dependent oxygenase superfamily protein(DIN11)
Oxidation-reduction process	BP	AT1G52790	2-oxoglutarate (2OG) and Fe(II)-dependent oxygenase superfamily protein(AT1G52790)
Oxidation-reduction process	BP	AT2G19590	ACC oxidase 1(ACO1)
Oxidation-reduction process	BP	AT1G15540	2-oxoglutarate-dependent dioxygenase-like protein(AT1G15540)
		Gene Group 4	Enrichment Score: 4.510669864753745
		TAIR_ID	Gene Name
serine-type carboxypeptidase activity	MF	AT3G16370	GDSL-like Lipase/Acylhydrolase superfamily protein(AT3G16370)
serine-type carboxypeptidase activity	MF	AT1G73290	serine carboxypeptidase-like 5(scpl5)
serine-type carboxypeptidase activity	MF	AT4G16230	GDSL-like Lipase/Acylhydrolase superfamily protein(AT4G16230)
serine-type carboxypeptidase activity	MF	AT3G48460	GDSL-like Lipase/Acylhydrolase superfamily protein(AT3G48460)
serine-type carboxypeptidase activity	MF	AT1G61130	serine carboxypeptidase-like 32(SCPL32)
serine-type carboxypeptidase activity	MF	AT3G12230	serine carboxypeptidase-like 14(scpl14)
serine-type carboxypeptidase activity	MF	AT3G17180	serine carboxypeptidase-like 33(scpl33)
		Gene Group 5	Enrichment Score: 4.21992566400167
		TAIR_ID	Gene Name
Hydrogen peroxide catabolic process	BP	AT1G34510	Peroxidase superfamily protein(AT1G34510)
Hydrogen peroxide catabolic process	BP	AT4G08780	Peroxidase superfamily protein(AT4G08780)
Hydrogen peroxide catabolic process	BP	AT5G06730	Peroxidase superfamily protein(AT5G06730)
Hydrogen peroxide catabolic process	BP	AT5G06720	peroxidase 2(PA2)
Hydrogen peroxide catabolic process	BP	AT5G64110	Peroxidase superfamily protein(AT5G64110)
Hydrogen peroxide catabolic process	BP	AT5G05340	Peroxidase superfamily protein(PRX52)
		Gene Group 6	Enrichment Score: 4.1267116646034525
		TAIR_ID	Gene Name
Oxidoreductase activity	MF	AT2G30750	cytochrome P450 family 71 polypeptide(CYP71A12)
Oxidoreductase activity	MF	AT3G26200	cytochrome P450, family 71, subfamily B, polypeptide 22(CYP71B22)
Oxidoreductase activity	MF	AT4G31970	cytochrome P450, family 82, subfamily C, polypeptide 2(CYP82C2)
Oxidoreductase activity	MF	AT3G53280	cytochrome p450 71b5(CYP71B5)
Oxidoreductase activity	MF	AT4G31940	cytochrome P450, family 82, subfamily C, polypeptide 4(CYP82C4)
Oxidoreductase activity	MF	AT4G19230	cytochrome P450, family 707, subfamily A, polypeptide 1(CYP707A1)
Oxidoreductase activity	MF	AT5G57220	cytochrome P450, family 81, subfamily F, polypeptide 2(CYP81F2)
Oxidoreductase activity	MF	AT3G52970	cytochrome P450, family 76, subfamily G, polypeptide 1(CYP76G1)
Oxidoreductase activity	MF	AT5G06905	cytochrome P450, family 712, subfamily A, polypeptide 2(CYP712A2)
Oxidoreductase activity	MF	AT5G06900	cytochrome P450, family 93, subfamily D, polypeptide 1(CYP93D1)
Oxidoreductase activity	MF	AT2G42250	cytochrome P450, family 712, subfamily A, polypeptide 1(CYP712A1)
Oxidoreductase activity	MF	AT3G26830	Cytochrome P450 superfamily protein(PAD3)
		Gene Group 7	Enrichment Score: 1.9476572665955965
		TAIR_ID	Gene Name
Integral component of the membrane	CC	AT1G77380	amino acid permease 3(AAP3)
Integral component of the membrane	CC	AT5G10040	transmembrane protein(AT5G10040)
Integral component of the membrane	CC	AT4G13420	high affinity K+ transporter 5(HAK5)
Integral component of the membrane	CC	AT1G08090	nitrate transporter 2:1(NRT2:1)
Integral component of the membrane	CC	AT4G13390	Proline-rich extensin-like family protein(EXT12)
Integral component of the membrane	CC	AT5G56100	glycine-rich protein / oleosin(AT5G56100)
Integral component of the membrane	CC	AT5G43570	Serine protease inhibitor, potato inhibitor I-type family protein(AT5G43570)
Integral component of the membrane	CC	AT1G25400	transmembrane protein(AT1G25400)
Integral component of the membrane	CC	AT4G15630	Uncharacterized protein family (UPF0497)(AT4G15630)
Integral component of the membrane	CC	AT4G19680	iron regulated transporter 2(IRT2)
Integral component of the membrane	CC	AT1G15010	mediator of RNA polymerase II transcription subunit(AT1G15010)
Integral component of the membrane	CC	AT1G47603	purine permease 19(PUP19)
Integral component of the membrane	CC	AT5G07570	glycine/proline-rich protein(AT5G07570)
Integral component of the membrane	CC	AT5G45105	miscRNA(ZIP8)
Integral component of the membrane	CC	AT3G45720	Major facilitator superfamily protein(AT3G45720)
Integral component of the membrane	CC	AT1G63055	transmembrane protein(AT1G63055)
Integral component of the membrane	CC	AT1G69480	EXS (ERD1/XPR1/SYG1) family protein(AT1G69480)
Integral component of the membrane	CC	AT4G12360	Bifunctional inhibitor/lipid-transfer protein/seed storage 2S albumin superfamily protein(AT4G12360)
Integral component of the membrane	CC	AT5G38820	Transmembrane amino acid transporter family protein(AT5G38820)
Integral component of the membrane	CC	AT1G73220	organic cation/carnitine transporter1(OCT1)
Integral component of the membrane	CC	AT3G21520	transmembrane protein, putative (DUF679 domain membrane protein 1)(DMP1)
Integral component of the membrane	CC	AT4G37220	Cold acclimation protein WCOR413 family(AT4G37220)
Integral component of the membrane	CC	AT3G60470	transmembrane protein, putative (DUF247)(AT3G60470)
Integral component of the membrane	CC	AT1G70260	nodulin MtN21 /EamA-like transporter family protein(UMAMIT36)
Integral component of the membrane	CC	AT1G07680	transmembrane protein(AT1G07680)
Integral component of the membrane	CC	AT4G21680	NITRATE TRANSPORTER 1.8(NRT1.8)
Integral component of the membrane	CC	AT4G28040	nodulin MtN21 /EamA-like transporter family protein(UMAMIT33)
Integral component of the membrane	CC	AT1G71140	MATE efflux family protein(AT1G71140)
Integral component of the membrane	CC	AT2G34315	avirulence induced family protein(AT2G34315)
Integral component of the membrane	CC	AT1G20180	transmembrane protein (DUF677)(AT1G20180)
Integral component of the membrane	CC	AT5G23660	bidirectional sugar transporter SWEET12-like protein(SWEET12)
Integral component of the membrane	CC	AT1G15610	transmembrane protein(AT1G15610)
Integral component of the membrane	CC	AT3G06435	Expressed protein(AT3G06435)
Integral component of the membrane	CC	AT4G35180	LYS/HIS transporter 7(LHT7)
Integral component of the membrane	CC	AT2G01300	mediator of RNA polymerase II transcription subunit(AT2G01300)
Integral component of the membrane	CC	AT2G04070	MATE efflux family protein(AT2G04070)
Integral component of the membrane	CC	AT4G10310	high-affinity K+ transporter 1(HKT1)
Integral component of the membrane	CC	AT5G26340	Major facilitator superfamily protein(MSS1)
Integral component of the membrane	CC	AT2G04040	MATE efflux family protein(DTX1)
Integral component of the membrane	CC	AT4G19925	Toll-Interleukin-Resistance (TIR) domain family protein(AT4G19925)
Integral component of the membrane	CC	AT2G32270	zinc transporter 3 precursor(ZIP3)
Integral component of the membrane	CC	AT2G16660	Major facilitator superfamily protein(AT2G16660)
Integral component of the membrane	CC	AT5G67370	DUF1230 family protein (DUF1230)(CGLD27)
Integral component of the membrane	CC	AT2G39510	nodulin MtN21 /EamA-like transporter family protein(UMAMIT14)
Integral component of the membrane	CC	AT4G24110	NADP-specific glutamate dehydrogenase(AT4G24110)
Integral component of the membrane	CC	AT2G32140	transmembrane receptor(AT2G32140)
Integral component of the membrane	CC	AT4G34950	Major facilitator superfamily protein(AT4G34950)
Integral component of the membrane	CC	AT1G03700	Uncharacterized protein family (UPF0497)(AT1G03700)
Integral component of the membrane	CC	AT3G46900	copper transporter 2(COPT2)
Integral component of the membrane	CC	AT4G27654	transmembrane protein(AT4G27654)
		Gene Group 8	Enrichment Score: 1.7025003112055361
		TAIR_ID	Gene Name
Flavonoid-glucoronidation	BP	AT3G21780	UDP-glucosyl transferase 71B6(UGT71B6)
Flavonoid-glucoronidation	BP	AT3G21560	UDP-Glycosyltransferase superfamily protein(UGT84A2)
Flavonoid-glucoronidation	BP	AT1G05530	UDP-glucosyl transferase 75B2(UGT75B2)
Flavonoid-glucoronidation	BP	AT3G02100	UDP-Glycosyltransferase superfamily protein(AT3G02100)
Flavonoid-glucoronidation	BP	AT2G15490	UDP-glycosyltransferase 73B4(UGT73B4)
Flavonoid-glucoronidation	BP	AT2G16890	UDP-Glycosyltransferase superfamily protein(AT2G16890)
Flavonoid-glucoronidation	BP	AT3G21790	UDP-Glycosyltransferase superfamily protein(AT3G21790)
Flavonoid-glucoronidation	BP	AT5G49690	UDP-Glycosyltransferase superfamily protein(AT5G49690)
		Gene Group 9	Enrichment Score: 1.130489367517636
		TAIR_ID	Gene Name
ATPase activity couple to transmembrane transport of substances	MF	AT1G17840	white-brown complex-like protein(ABCG11)
ATPase activity couple to transmembrane transport of substances	MF	AT1G28010	P-glycoprotein 14(ABCB14)
ATPase activity couple to transmembrane transport of substances	MF	AT3G13090	multidrug resistance-associated protein 8(ABCC6)
ATPase activity couple to transmembrane transport of substances	MF	AT1G66950	pleiotropic drug resistance 11(ABCG39)
ATPase activity couple to transmembrane transport of substances	MF	AT5G52860	ABC-2 type transporter family protein(ABCG8)
		Gene Group 10	Enrichment Score: 1.0574880892778713
		TAIR_ID	Gene Name
Protein-serine threonine kinase activity	MF	AT1G48260	CBL-interacting protein kinase 17(CIPK17)
Protein-serine threonine kinase activity	MF	AT2G38490	CBL-interacting Serine/Threonine-kinase(CIPK22)
Protein-serine threonine kinase activity	MF	AT5G67080	mitogen-activated protein kinase kinase kinase 19(MAPKKK19)
Protein-serine threonine kinase activity	MF	AT1G21270	wall-associated kinase 2(WAK2)
Protein-serine threonine kinase activity	MF	AT4G23260	cysteine-rich RLK (RECEPTOR-like protein kinase) 18(CRK18)
Protein-serine threonine kinase activity	MF	AT1G79680	WALL ASSOCIATED KINASE (WAK)-LIKE 10(WAKL10)
Protein-serine threonine kinase activity	MF	AT1G67000	Protein kinase superfamily protein(AT1G67000)
		Gene Group 11	Enrichment Score: 0.17556667757317743
		TAIR_ID	Gene Name
Transcription-DNA templated	BP	AT1G52890	NAC domain containing protein 19(NAC019)
Transcription-DNA templated	BP	AT1G12610	Integrase-type DNA-binding superfamily protein(DDF1)
Transcription-DNA templated	BP	AT4G34410	redox responsive transcription factor 1(RRTF1)
Transcription-DNA templated	BP	AT3G01970	WRKY DNA-binding protein 45(WRKY45)
Transcription-DNA templated	BP	AT4G04890	protodermal factor 2(PDF2)
Transcription-DNA templated	BP	AT5G04150	basic helix-loop-helix (bHLH) DNA-binding superfamily protein(BHLH101)
Transcription-DNA templated	BP	AT2G14210	AGAMOUS-like 44(AGL44)
Transcription-DNA templated	BP	AT1G28370	ERF domain protein 11(ERF11)
Transcription-DNA templated	BP	AT2G41240	basic helix-loop-helix protein 100(BHLH100)
Transcription-DNA templated	BP	AT5G13330	related to AP2 6l(Rap2.6L)
Transcription-DNA templated	BP	AT5G51860	K-box region and MADS-box transcription factor family protein(AGL72)
Transcription-DNA templated	BP	AT2G44840	ethylene-responsive element binding factor 13(ERF13)
Transcription-DNA templated	BP	AT3G04070	NAC domain containing protein 47(NAC047)
Transcription-DNA templated	BP	AT3G13840	GRAS family transcription factor(AT3G13840)
Transcription-DNA templated	BP	AT1G80840	WRKY DNA-binding protein 40(WRKY40)
Transcription-DNA templated	BP	AT5G01900	WRKY DNA-binding protein 62(WRKY62)
Transcription-DNA templated	BP	AT1G73805	Calmodulin binding protein-like protein(SARD1)
Transcription-DNA templated	BP	AT3G56980	basic helix-loop-helix (bHLH) DNA-binding superfamily protein(bHLH39)
Transcription-DNA templated	BP	AT2G47520	Integrase-type DNA-binding superfamily protein(ERF71)
Transcription-DNA templated	BP	AT3G56970	basic helix-loop-helix (bHLH) DNA-binding superfamily protein(bHLH38)
Transcription-DNA templated	BP	AT3G03660	WUSCHEL related homeobox 11(WOX11)
Transcription-DNA templated	BP	AT5G26920	Cam-binding protein 60-like G(CBP60G)
Transcription-DNA templated	BP	AT2G38340	Integrase-type DNA-binding superfamily protein(DREB19)
Transcription-DNA templated	BP	AT5G47220	ethylene responsive element binding factor 2(ERF2)
Shoots
		Gene Group 1	Enrichment Score: 2.5442732399396593
		TAIR_ID	Gene Name
Transcription-DNA templated	BP	AT1G52890	NAC domain containing protein 19(NAC019)
Transcription-DNA templated	BP	AT5G18270	NAC domain containing protein 87(ANAC087)
Transcription-DNA templated	BP	AT1G12610	Integrase-type DNA-binding superfamily protein(DDF1)
Transcription-DNA templated	BP	AT4G34410	redox responsive transcription factor 1(RRTF1)
Transcription-DNA templated	BP	AT5G59570	Homeodomain-like superfamily protein(BOA)
Transcription-DNA templated	BP	AT5G04150	basic helix-loop-helix (bHLH) DNA-binding superfamily protein(BHLH101)
Transcription-DNA templated	BP	AT1G63030	Integrase-type DNA-binding superfamily protein(ddf2)
Transcription-DNA templated	BP	AT1G68840	related to ABI3/VP1 2(RAV2)
Transcription-DNA templated	BP	AT2G46770	NAC (No Apical Meristem) domain transcriptional regulator superfamily protein(NST1)
Transcription-DNA templated	BP	AT1G21910	Integrase-type DNA-binding superfamily protein(DREB26)
Transcription-DNA templated	BP	AT2G21650	Homeodomain-like superfamily protein(MEE3)
Transcription-DNA templated	BP	AT2G41240	basic helix-loop-helix protein 100(BHLH100)
Transcription-DNA templated	BP	AT4G17490	ethylene responsive element binding factor 6(ERF6)
Transcription-DNA templated	BP	AT2G40750	WRKY DNA-binding protein 54(WRKY54)
Transcription-DNA templated	BP	AT1G80840	WRKY DNA-binding protein 40(WRKY40)
Transcription-DNA templated	BP	AT1G73805	Calmodulin binding protein-like protein(SARD1)
Transcription-DNA templated	BP	AT3G28917	mini zinc finger 2(MIF2)
Transcription-DNA templated	BP	AT5G51780	basic helix-loop-helix (bHLH) DNA-binding superfamily protein(AT5G51780)
Transcription-DNA templated	BP	AT3G56980	basic helix-loop-helix (bHLH) DNA-binding superfamily protein(bHLH39)
Transcription-DNA templated	BP	AT3G09600	Homeodomain-like superfamily protein(RVE8)
Transcription-DNA templated	BP	AT3G56970	basic helix-loop-helix (bHLH) DNA-binding superfamily protein(bHLH38)
Transcription-DNA templated	BP	AT5G24110	WRKY DNA-binding protein 30(WRKY30)
Transcription-DNA templated	BP	AT5G14490	NAC domain containing protein 85(NAC085)
Transcription-DNA templated	BP	AT1G69490	NAC-like, activated by AP3/PI(NAP)
Transcription-DNA templated	BP	AT4G27410	NAC (No Apical Meristem) domain transcriptional regulator superfamily protein(RD26)
Transcription-DNA templated	BP	AT3G56400	WRKY DNA-binding protein 70(WRKY70)
Transcription-DNA templated	BP	AT5G48560	basic helix-loop-helix (bHLH) DNA-binding superfamily protein(AT5G48560)
Transcription-DNA templated	BP	AT2G38340	Integrase-type DNA-binding superfamily protein(DREB19)
		Gene Group 2	Enrichment Score: 2.2595331376586314
		TAIR_ID	Gene Name
xyloglucan metabolic process	BP	AT1G32170	xyloglucan endotransglucosylase/hydrolase 30(XTH30)
xyloglucan metabolic process	BP	AT4G14130	xyloglucan endotransglucosylase/hydrolase 15(XTH15)
xyloglucan metabolic process	BP	AT4G30280	xyloglucan endotransglucosylase/hydrolase 18(XTH18)
xyloglucan metabolic process	BP	AT5G57560	Xyloglucan endotransglucosylase/hydrolase family protein(TCH4)
xyloglucan metabolic process	BP	AT5G57550	xyloglucan endotransglucosylase/hydrolase 25(XTH25)
		Gene Group 3	Enrichment Score: 1.6539911720613982
		TAIR_ID	Gene Name
iron ion binding	MF	AT2G30770	cytochrome P450 family 71 polypeptide(CYP71A13)
iron ion binding	MF	AT1G01280	cytochrome P450, family 703, subfamily A, polypeptide 2(CYP703A2)
iron ion binding	MF	AT3G48520	cytochrome P450, family 94, subfamily B, polypeptide 3(CYP94B3)
iron ion binding	MF	AT1G69500	cytochrome P450, family 704, subfamily B, polypeptide 1(CYP704B1)
iron ion binding	MF	AT5G45340	cytochrome P450, family 707, subfamily A, polypeptide 3(CYP707A3)
		Gene Group 4	Enrichment Score: 1.6030208854306542
		TAIR_ID	Gene Name
Calcium ion binding	MF	AT5G54490	pinoid-binding protein 1(PBP1)
Calcium ion binding	MF	AT5G37770	EF hand calcium-binding protein family(TCH2)
Calcium ion binding	MF	AT5G39670	Calcium-binding EF-hand family protein(AT5G39670)
Calcium ion binding	MF	AT1G76650	calmodulin-like 38(CML38)
Calcium ion binding	MF	AT3G50770	calmodulin-like 41(CML41)
		Gene Group 5	Enrichment Score: 0.6054305375104649
		TAIR_ID	Gene Name
Integral component of membrane	CC	AT1G14880	PLANT CADMIUM RESISTANCE 1(PCR1)
Integral component of membrane	CC	AT5G39670	Calcium-binding EF-hand family protein(AT5G39670)
Integral component of membrane	CC	AT1G74450	BPS1-like protein (DUF793)(AT1G74450)
Integral component of membrane	CC	AT1G74440	ER membrane protein, putative (DUF962)(AT1G74440)
Integral component of membrane	CC	AT1G19380	sugar, putative (DUF1195)(AT1G19380)
Integral component of membrane	CC	AT2G36885	translation initiation factor(AT2G36885)
Integral component of membrane	CC	AT1G34060	Pyridoxal phosphate (PLP)-dependent transferases superfamily protein(AT1G34060)
Integral component of membrane	CC	AT5G03545	expressed in response to phosphate starvation protein(AT5G03545)
Integral component of membrane	CC	AT1G25400	transmembrane protein(AT1G25400)
Integral component of membrane	CC	AT4G27654	transmembrane protein(AT4G27654)
Integral component of membrane	CC	AT1G10340	Ankyrin repeat family protein(AT1G10340)
Integral component of membrane	CC	AT4G00700	C2 calcium/lipid-binding plant phosphoribosyltransferase family protein(AT4G00700)
Integral component of membrane	CC	AT5G51010	Rubredoxin-like superfamily protein(AT5G51010)
Integral component of membrane	CC	AT3G05890	Low temperature and salt responsive protein family(RCI2B)
Integral component of membrane	CC	AT5G55490	gamete expressed protein 1(GEX1)
Integral component of membrane	CC	AT5G53250	arabinogalactan protein 22(AGP22)
Integral component of membrane	CC	AT4G01140	transmembrane protein, putative (DUF1191)(AT4G01140)
Integral component of membrane	CC	AT4G37420	glycosyltransferase family protein (DUF23)(AT4G37420)
Integral component of membrane	CC	AT4G18190	purine permease 6(PUP6)
Integral component of membrane	CC	AT2G27080	Late embryogenesis abundant (LEA) hydroxyproline-rich glycoprotein family(AT2G27080)
Integral component of membrane	CC	AT1G15010	mediator of RNA polymerase II transcription subunit(AT1G15010)
Integral component of membrane	CC	AT2G04050	MATE efflux family protein(AT2G04050)
Integral component of membrane	CC	AT1G17665	CA-responsive protein(AT1G17665)
Integral component of membrane	CC	AT3G28270	transmembrane protein, putative (DUF677)(AT3G28270)
		Gene Group 6	Enrichment Score: 0.521254550520831
		TAIR_ID	Gene Name
Plasma membrane	CC	AT1G14880	PLANT CADMIUM RESISTANCE 1(PCR1)
Plasma membrane	CC	AT5G23660	bidirectional sugar transporter SWEET12-like protein(SWEET12)
Plasma membrane	CC	AT2G04050	MATE efflux family protein(AT2G04050)
Plasma membrane	CC	AT1G73220	organic cation/carnitine transporter1(OCT1)
Plasma membrane	CC	AT3G28510	P-loop containing nucleoside triphosphate hydrolases superfamily protein(AT3G28510)

## Sheet: Table S4
Table S4. GO enrichment analysis of co-expression network genes (Fig. 5) in roots as determined by STRING analysis.
BP
#pathway ID	pathway description	observed gene count	false discovery rate	matching proteins in your network (IDs)	matching proteins in your network (labels)
GO.0006950	response to stress	40	1.53e-10	AT1G12610.1, AT1G17840.1, AT1G27950.1, AT1G34510.1, AT1G66950.1, AT1G73805.1, AT1G76650.1, AT1G77120.1, AT1G80840.1, AT2G16060.1, AT2G19590.1, AT2G26560.1, AT2G41240.1, AT2G44840.1, AT2G47520.1, AT3G25190.1, AT3G26200.1, AT3G26830.1, AT3G43190.1, AT3G46230.1, AT3G53280.1, AT3G56970.1, AT3G56980.1, AT4G10310.1, AT4G12470.1, AT4G12480.1, AT4G19690.2, AT4G31940.1, AT4G33070.1, AT4G33220.1, AT4G34410…	ABCG11, ABCG39, ADH1, AT1G34510, AT3G25190, AT4G33070, AT5G15120, AT5G39890, AZI1, At2g19590, BGLU42, BHLH100, BHLH101, CBP60G, CML37, CML38, CYP71B22, CYP71B5, CYP82C4, DDF1, EARLI1, ERF13, ERF2, ERF71, FER1, HB1, HKT1, HSP17.4, HSP17.6A, IRT1, LTPG1, PAD3, PLA2A, PME44, RRTF1, SARD1, SUS4, WRKY40, bHLH38, bHLH39
GO.0055072	iron ion homeostasis	9	2.77e-10	AT1G01580.1, AT2G41240.1, AT3G25190.1, AT3G56970.1, AT3G56980.1, AT4G19680.2, AT4G19690.2, AT5G01600.1, AT5G04150.1	AT3G25190, BHLH100, BHLH101, FER1, FRO2, IRT1, IRT2, bHLH38, bHLH39
GO.0036293	response to decreased oxygen levels	9	1.48e-09	AT1G77120.1, AT2G16060.1, AT2G26560.1, AT2G47520.1, AT3G43190.1, AT4G33070.1, AT5G15120.1, AT5G26920.1, AT5G39890.1	ADH1, AT4G33070, AT5G15120, AT5G39890, CBP60G, ERF71, HB1, PLA2A, SUS4
GO.0055080	cation homeostasis	10	1.56e-08	AT1G01580.1, AT2G41240.1, AT3G25190.1, AT3G56970.1, AT3G56980.1, AT4G10310.1, AT4G19680.2, AT4G19690.2, AT5G01600.1, AT5G04150.1	AT3G25190, BHLH100, BHLH101, FER1, FRO2, HKT1, IRT1, IRT2, bHLH38, bHLH39
GO.0050896	response to stimulus	47	6.79e-08	AT1G01580.1, AT1G08090.1, AT1G12610.1, AT1G17840.1, AT1G27950.1, AT1G28370.1, AT1G34510.1, AT1G66950.1, AT1G73805.1, AT1G76650.1, AT1G77120.1, AT1G80840.1, AT2G14210.1, AT2G16060.1, AT2G19590.1, AT2G26560.1, AT2G29460.1, AT2G41240.1, AT2G44840.1, AT2G47520.1, AT3G08860.1, AT3G25190.1, AT3G26200.1, AT3G26830.1, AT3G43190.1, AT3G44300.1, AT3G46230.1, AT3G53280.1, AT3G56970.1, AT3G56980.1, AT4G10310…	ABCG11, ABCG39, ADH1, AGL44, AT1G34510, AT3G25190, AT4G33070, AT5G15120, AT5G39890, AZI1, At2g19590, BGLU42, BHLH100, BHLH101, CBP60G, CML37, CML38, CYP71B22, CYP71B5, CYP82C4, DDF1, EARLI1, ERF11, ERF13, ERF2, ERF71, FER1, FRO2, GSTU4, HB1, HKT1, HSP17.4, HSP17.6A, IRT1, LTPG1, NIT2, NRT2:1, PAD3, PLA2A, PME44, PYD4, RRTF1, SARD1, SUS4, WRKY40, bHLH38, bHLH39
GO.1902170	cellular response to reactive nitrogen species	6	8.16e-08	AT2G14210.1, AT2G19590.1, AT3G25190.1, AT3G53280.1, AT4G19690.2, AT5G36890.1	AGL44, AT3G25190, At2g19590, BGLU42, CYP71B5, IRT1
GO.0010039	response to iron ion	7	1.36e-07	AT2G19590.1, AT3G25190.1, AT3G53280.1, AT4G19690.2, AT4G31940.1, AT5G01600.1, AT5G36890.1	AT3G25190, At2g19590, BGLU42, CYP71B5, CYP82C4, FER1, IRT1
GO.0009605	response to external stimulus	24	1.49e-07	AT1G01580.1, AT1G27950.1, AT1G73805.1, AT1G80840.1, AT2G14210.1, AT2G19590.1, AT2G26560.1, AT2G41240.1, AT3G08860.1, AT3G26200.1, AT3G26830.1, AT3G53280.1, AT3G56970.1, AT3G56980.1, AT4G12470.1, AT4G12480.1, AT4G19690.2, AT4G31940.1, AT4G33220.1, AT4G34410.1, AT5G01600.1, AT5G04150.1, AT5G26920.1, AT5G47220.1	AGL44, AZI1, At2g19590, BHLH100, BHLH101, CBP60G, CYP71B22, CYP71B5, CYP82C4, EARLI1, ERF2, FER1, FRO2, IRT1, LTPG1, PAD3, PLA2A, PME44, PYD4, RRTF1, SARD1, WRKY40, bHLH38, bHLH39
GO.0071241	cellular response to inorganic substance	7	1.68e-07	AT2G14210.1, AT2G19590.1, AT3G25190.1, AT3G53280.1, AT4G19690.2, AT4G31940.1, AT5G36890.1	AGL44, AT3G25190, At2g19590, BGLU42, CYP71B5, CYP82C4, IRT1
GO.0001666	response to hypoxia	7	2.95e-07	AT1G77120.1, AT2G16060.1, AT2G26560.1, AT3G43190.1, AT5G15120.1, AT5G26920.1, AT5G39890.1	ADH1, AT5G15120, AT5G39890, CBP60G, HB1, PLA2A, SUS4
GO.0071281	cellular response to iron ion	6	5.41e-07	AT2G19590.1, AT3G25190.1, AT3G53280.1, AT4G19690.2, AT4G31940.1, AT5G36890.1	AT3G25190, At2g19590, BGLU42, CYP71B5, CYP82C4, IRT1
GO.1901698	response to nitrogen compound	11	5.82e-07	AT1G08090.1, AT1G80840.1, AT2G14210.1, AT2G19590.1, AT2G44840.1, AT3G25190.1, AT3G53280.1, AT4G19690.2, AT4G34410.1, AT5G36890.1, AT5G47220.1	AGL44, AT3G25190, At2g19590, BGLU42, CYP71B5, ERF13, ERF2, IRT1, NRT2:1, RRTF1, WRKY40
GO.0042221	response to chemical	31	9.19e-07	AT1G08090.1, AT1G12610.1, AT1G17840.1, AT1G28370.1, AT1G66950.1, AT1G73805.1, AT1G77120.1, AT1G80840.1, AT2G14210.1, AT2G19590.1, AT2G26560.1, AT2G29460.1, AT2G41240.1, AT2G44840.1, AT2G47520.1, AT3G25190.1, AT3G26830.1, AT3G44300.1, AT3G53280.1, AT4G12480.1, AT4G19690.2, AT4G31940.1, AT4G34410.1, AT5G01600.1, AT5G12030.1, AT5G15120.1, AT5G26920.1, AT5G36890.1, AT5G39890.1, AT5G42380.1, AT5G47220…	ABCG11, ABCG39, ADH1, AGL44, AT3G25190, AT5G15120, AT5G39890, At2g19590, BGLU42, BHLH100, CBP60G, CML37, CYP71B5, CYP82C4, DDF1, EARLI1, ERF11, ERF13, ERF2, ERF71, FER1, GSTU4, HSP17.6A, IRT1, NIT2, NRT2:1, PAD3, PLA2A, RRTF1, SARD1, WRKY40
GO.0000302	response to reactive oxygen species	9	1.11e-06	AT1G66950.1, AT2G19590.1, AT3G25190.1, AT3G53280.1, AT4G19690.2, AT5G01600.1, AT5G12030.1, AT5G36890.1, AT5G42380.1	ABCG39, AT3G25190, At2g19590, BGLU42, CML37, CYP71B5, FER1, HSP17.6A, IRT1
GO.0010035	response to inorganic substance	17	1.19e-06	AT1G08090.1, AT1G12610.1, AT1G77120.1, AT2G14210.1, AT2G19590.1, AT2G26560.1, AT2G41240.1, AT3G25190.1, AT3G26830.1, AT3G44300.1, AT3G53280.1, AT4G19690.2, AT4G31940.1, AT5G01600.1, AT5G12030.1, AT5G36890.1, AT5G42380.1	ADH1, AGL44, AT3G25190, At2g19590, BGLU42, BHLH100, CML37, CYP71B5, CYP82C4, DDF1, FER1, HSP17.6A, IRT1, NIT2, NRT2:1, PAD3, PLA2A
GO.0010106	cellular response to iron ion starvation	4	1.24e-06	AT2G41240.1, AT3G56970.1, AT3G56980.1, AT5G04150.1	BHLH100, BHLH101, bHLH38, bHLH39
GO.0071732	cellular response to nitric oxide	5	1.42e-06	AT2G19590.1, AT3G25190.1, AT3G53280.1, AT4G19690.2, AT5G36890.1	AT3G25190, At2g19590, BGLU42, CYP71B5, IRT1
GO.1901700	response to oxygen-containing compound	21	2.25e-06	AT1G08090.1, AT1G12610.1, AT1G17840.1, AT1G66950.1, AT1G80840.1, AT2G14210.1, AT2G19590.1, AT2G41240.1, AT2G44840.1, AT3G25190.1, AT3G26830.1, AT3G53280.1, AT4G12480.1, AT4G19690.2, AT4G34410.1, AT5G01600.1, AT5G12030.1, AT5G26920.1, AT5G36890.1, AT5G42380.1, AT5G47220.1	ABCG11, ABCG39, AGL44, AT3G25190, At2g19590, BGLU42, BHLH100, CBP60G, CML37, CYP71B5, DDF1, EARLI1, ERF13, ERF2, FER1, HSP17.6A, IRT1, NRT2:1, PAD3, RRTF1, WRKY40
GO.0044699	single-organism process	56	2.91e-05	AT1G01480.1, AT1G01580.1, AT1G08090.1, AT1G12610.1, AT1G17840.1, AT1G27950.1, AT1G28370.1, AT1G34510.1, AT1G43800.1, AT1G60600.2, AT1G66950.1, AT1G73805.1, AT1G77120.1, AT2G14210.1, AT2G16060.1, AT2G26400.1, AT2G26560.1, AT2G29150.1, AT2G29460.1, AT2G30670.1, AT2G30750.1, AT2G32270.1, AT2G41240.1, AT2G44840.1, AT2G47520.1, AT3G08860.1, AT3G16370.1, AT3G22910.1, AT3G25190.1, AT3G26200.1, AT3G26830…	ABC4, ABCG11, ABCG39, ACS2, ADH1, AGL44, ALDH3F1, ARD3, AT1G34510, AT2G29150, AT2G30670, AT3G16370, AT3G22910, AT3G25190, AT3G27220, AT3G58060, AT4G28420, AZI1, BHLH100, BHLH101, CBP60G, CYP71A12, CYP71B22, CYP71B5, CYP82C4, DDF1, ERF11, ERF13, ERF2, ERF71, FER1, FRO2, FTM1, GSTU4, HAK5, HB1, HKT1, IRT1, IRT2, LTPG1, LTPG2, MTPA2, NIT2, NRT2:1, NYC1, PAD3, PLA2A, PYD4, RRTF1, SARD1, SQE6, SUS4, T…
GO.0071369	cellular response to ethylene stimulus	9	3.37e-05	AT1G28370.1, AT2G44840.1, AT2G47520.1, AT3G25190.1, AT3G53280.1, AT4G19690.2, AT4G34410.1, AT5G36890.1, AT5G47220.1	AT3G25190, BGLU42, CYP71B5, ERF11, ERF13, ERF2, ERF71, IRT1, RRTF1
GO.0051707	response to other organism	17	0.000104	AT1G01580.1, AT1G27950.1, AT1G73805.1, AT1G80840.1, AT2G26560.1, AT3G26200.1, AT3G26830.1, AT3G53280.1, AT4G12470.1, AT4G12480.1, AT4G19690.2, AT4G31940.1, AT4G33220.1, AT4G34410.1, AT5G01600.1, AT5G26920.1, AT5G47220.1	AZI1, CBP60G, CYP71B22, CYP71B5, CYP82C4, EARLI1, ERF2, FER1, FRO2, IRT1, LTPG1, PAD3, PLA2A, PME44, RRTF1, SARD1, WRKY40
GO.0009617	response to bacterium	10	0.000112	AT1G01580.1, AT1G73805.1, AT1G80840.1, AT3G26830.1, AT4G12470.1, AT4G19690.2, AT4G33220.1, AT5G01600.1, AT5G26920.1, AT5G47220.1	AZI1, CBP60G, ERF2, FER1, FRO2, IRT1, PAD3, PME44, SARD1, WRKY40
GO.0055114	oxidation-reduction process	19	0.000212	AT1G01580.1, AT1G34510.1, AT1G43800.1, AT1G60600.2, AT1G77120.1, AT2G19590.1, AT2G26400.1, AT2G29150.1, AT2G30670.1, AT2G30750.1, AT3G26200.1, AT3G26830.1, AT3G27220.1, AT3G53280.1, AT4G13250.1, AT4G31940.1, AT4G36250.1, AT5G01600.1, AT5G24160.1	ABC4, ADH1, ALDH3F1, ARD3, AT1G34510, AT2G29150, AT2G30670, AT3G27220, At2g19590, CYP71A12, CYP71B22, CYP71B5, CYP82C4, FER1, FRO2, FTM1, NYC1, PAD3, SQE6
GO.0009628	response to abiotic stimulus	20	0.000227	AT1G12610.1, AT1G17840.1, AT1G73805.1, AT1G77120.1, AT2G16060.1, AT2G26560.1, AT2G41240.1, AT2G47520.1, AT3G26830.1, AT3G43190.1, AT3G46230.1, AT4G10310.1, AT4G12470.1, AT4G12480.1, AT4G33070.1, AT5G01600.1, AT5G12030.1, AT5G15120.1, AT5G26920.1, AT5G39890.1	ABCG11, ADH1, AT4G33070, AT5G15120, AT5G39890, AZI1, BHLH100, CBP60G, DDF1, EARLI1, ERF71, FER1, HB1, HKT1, HSP17.4, HSP17.6A, PAD3, PLA2A, SARD1, SUS4
GO.0031667	response to nutrient levels	7	0.000241	AT2G14210.1, AT2G19590.1, AT2G41240.1, AT3G08860.1, AT3G56970.1, AT3G56980.1, AT5G04150.1	AGL44, At2g19590, BHLH100, BHLH101, PYD4, bHLH38, bHLH39
GO.0033554	cellular response to stress	13	0.000269	AT1G73805.1, AT2G19590.1, AT2G26560.1, AT2G41240.1, AT3G25190.1, AT3G53280.1, AT3G56970.1, AT3G56980.1, AT4G12470.1, AT4G19690.2, AT5G04150.1, AT5G26920.1, AT5G36890.1	AT3G25190, AZI1, At2g19590, BGLU42, BHLH100, BHLH101, CBP60G, CYP71B5, IRT1, PLA2A, SARD1, bHLH38, bHLH39
GO.0010038	response to metal ion	10	0.00042	AT1G77120.1, AT2G19590.1, AT2G26560.1, AT3G25190.1, AT3G44300.1, AT3G53280.1, AT4G19690.2, AT4G31940.1, AT5G01600.1, AT5G36890.1	ADH1, AT3G25190, At2g19590, BGLU42, CYP71B5, CYP82C4, FER1, IRT1, NIT2, PLA2A
GO.0051704	multi-organism process	18	0.000459	AT1G01580.1, AT1G27950.1, AT1G56430.1, AT1G73805.1, AT1G80840.1, AT2G26560.1, AT3G26200.1, AT3G26830.1, AT3G53280.1, AT4G12470.1, AT4G12480.1, AT4G19690.2, AT4G31940.1, AT4G33220.1, AT4G34410.1, AT5G01600.1, AT5G26920.1, AT5G47220.1	AZI1, CBP60G, CYP71B22, CYP71B5, CYP82C4, EARLI1, ERF2, FER1, FRO2, IRT1, LTPG1, NAS4, PAD3, PLA2A, PME44, RRTF1, SARD1, WRKY40
GO.0006979	response to oxidative stress	10	0.000478	AT1G34510.1, AT1G66950.1, AT2G19590.1, AT3G25190.1, AT3G53280.1, AT4G19690.2, AT5G01600.1, AT5G12030.1, AT5G36890.1, AT5G42380.1	ABCG39, AT1G34510, AT3G25190, At2g19590, BGLU42, CML37, CYP71B5, FER1, HSP17.6A, IRT1
GO.0006829	zinc II ion transport	4	0.000526	AT2G32270.1, AT3G58810.1, AT4G19680.2, AT4G19690.2	IRT1, IRT2, MTPA2, ZIP3
GO.0098542	defense response to other organism	14	0.000526	AT1G27950.1, AT1G73805.1, AT1G80840.1, AT2G26560.1, AT3G26200.1, AT3G26830.1, AT3G53280.1, AT4G12470.1, AT4G12480.1, AT4G31940.1, AT4G33220.1, AT4G34410.1, AT5G26920.1, AT5G47220.1	AZI1, CBP60G, CYP71B22, CYP71B5, CYP82C4, EARLI1, ERF2, LTPG1, PAD3, PLA2A, PME44, RRTF1, SARD1, WRKY40
GO.0000041	transition metal ion transport	5	0.000656	AT2G32270.1, AT3G58810.1, AT4G19680.2, AT4G19690.2, AT5G01600.1	FER1, IRT1, IRT2, MTPA2, ZIP3
GO.0044763	single-organism cellular process	45	0.000812	AT1G01480.1, AT1G08090.1, AT1G12610.1, AT1G28370.1, AT1G34510.1, AT1G43800.1, AT1G60600.2, AT1G66950.1, AT1G72970.1, AT1G73805.1, AT2G19590.1, AT2G26400.1, AT2G26560.1, AT2G29460.1, AT2G32270.1, AT2G41240.1, AT2G44840.1, AT2G47520.1, AT3G08860.1, AT3G22910.1, AT3G26830.1, AT3G27220.1, AT3G43190.1, AT3G44300.1, AT3G56970.1, AT3G56980.1, AT3G58060.1, AT3G58810.1, AT4G10310.1, AT4G12470.1, AT4G13250…	ABC4, ABCG39, ACS2, ALDH3F1, ARD3, AT1G34510, AT3G22910, AT3G27220, AT3G58060, AT4G28420, AT5G15120, AT5G39890, AZI1, At2g19590, BHLH100, BHLH101, CBP60G, CYP82C4, DDF1, ERF11, ERF13, ERF2, ERF71, FER1, FTM1, GSTU4, HAK5, HKT1, HTH, IRT1, IRT2, MTPA2, NIT2, NRT2:1, NYC1, PAD3, PLA2A, PYD4, RRTF1, SARD1, SUS4, THAS1, ZIP3, bHLH38, bHLH39
GO.0030001	metal ion transport	8	0.000837	AT2G32270.1, AT3G22910.1, AT3G58810.1, AT4G10310.1, AT4G13420.1, AT4G19680.2, AT4G19690.2, AT5G01600.1	AT3G22910, FER1, HAK5, HKT1, IRT1, IRT2, MTPA2, ZIP3
GO.0006811	ion transport	13	0.00109	AT1G01580.1, AT1G08090.1, AT1G17840.1, AT2G32270.1, AT3G22910.1, AT3G25190.1, AT3G58060.1, AT3G58810.1, AT4G10310.1, AT4G13420.1, AT4G19680.2, AT4G19690.2, AT5G01600.1	ABCG11, AT3G22910, AT3G25190, AT3G58060, FER1, FRO2, HAK5, HKT1, IRT1, IRT2, MTPA2, NRT2:1, ZIP3
GO.0031669	cellular response to nutrient levels	6	0.0014	AT2G19590.1, AT2G41240.1, AT3G08860.1, AT3G56970.1, AT3G56980.1, AT5G04150.1	At2g19590, BHLH100, BHLH101, PYD4, bHLH38, bHLH39
GO.0010112	regulation of systemic acquired resistance	3	0.00163	AT1G73805.1, AT3G26830.1, AT5G26920.1	CBP60G, PAD3, SARD1
GO.0009061	anaerobic respiration	2	0.00167	AT3G27220.1, AT5G15120.1	AT3G27220, AT5G15120
GO.0018171	peptidyl-cysteine oxidation	2	0.00167	AT5G15120.1, AT5G39890.1	AT5G15120, AT5G39890
GO.0006952	defense response	16	0.0017	AT1G27950.1, AT1G73805.1, AT1G80840.1, AT2G19590.1, AT2G26560.1, AT2G44840.1, AT3G26200.1, AT3G26830.1, AT3G53280.1, AT4G12470.1, AT4G12480.1, AT4G31940.1, AT4G33220.1, AT4G34410.1, AT5G26920.1, AT5G47220.1	AZI1, At2g19590, CBP60G, CYP71B22, CYP71B5, CYP82C4, EARLI1, ERF13, ERF2, LTPG1, PAD3, PLA2A, PME44, RRTF1, SARD1, WRKY40
GO.0044765	single-organism transport	18	0.00182	AT1G01580.1, AT1G08090.1, AT1G17840.1, AT1G27950.1, AT1G56430.1, AT1G66950.1, AT2G16060.1, AT2G32270.1, AT3G22910.1, AT3G25190.1, AT3G43720.1, AT3G58060.1, AT3G58810.1, AT4G10310.1, AT4G13420.1, AT4G19680.2, AT4G19690.2, AT5G01600.1	ABCG11, ABCG39, AT3G22910, AT3G25190, AT3G58060, FER1, FRO2, HAK5, HB1, HKT1, IRT1, IRT2, LTPG1, LTPG2, MTPA2, NAS4, NRT2:1, ZIP3
GO.0070838	divalent metal ion transport	5	0.00413	AT2G32270.1, AT3G22910.1, AT3G58810.1, AT4G19680.2, AT4G19690.2	AT3G22910, IRT1, IRT2, MTPA2, ZIP3
GO.0006812	cation transport	9	0.00417	AT2G32270.1, AT3G22910.1, AT3G58060.1, AT3G58810.1, AT4G10310.1, AT4G13420.1, AT4G19680.2, AT4G19690.2, AT5G01600.1	AT3G22910, AT3G58060, FER1, HAK5, HKT1, IRT1, IRT2, MTPA2, ZIP3
GO.0070483	detection of hypoxia	2	0.00417	AT5G15120.1, AT5G39890.1	AT5G15120, AT5G39890
GO.0071577	zinc II ion transmembrane transport	3	0.00417	AT2G32270.1, AT4G19680.2, AT4G19690.2	IRT1, IRT2, ZIP3
GO.0044710	single-organism metabolic process	30	0.00488	AT1G01480.1, AT1G01580.1, AT1G08090.1, AT1G34510.1, AT1G43800.1, AT1G56430.1, AT1G60600.2, AT1G77120.1, AT2G19590.1, AT2G26400.1, AT2G26560.1, AT2G29150.1, AT2G29460.1, AT2G30670.1, AT2G30750.1, AT3G16370.1, AT3G26200.1, AT3G26830.1, AT3G27220.1, AT3G43190.1, AT3G44300.1, AT3G53280.1, AT4G13250.1, AT4G28420.2, AT4G31940.1, AT4G36250.1, AT5G01600.1, AT5G24160.1, AT5G26920.1, AT5G48010.2	ABC4, ACS2, ADH1, ALDH3F1, ARD3, AT1G34510, AT2G29150, AT2G30670, AT3G16370, AT3G27220, AT4G28420, At2g19590, CBP60G, CYP71A12, CYP71B22, CYP71B5, CYP82C4, FER1, FRO2, FTM1, GSTU4, NAS4, NIT2, NRT2:1, NYC1, PAD3, PLA2A, SQE6, SUS4, THAS1
GO.0051716	cellular response to stimulus	21	0.00523	AT1G28370.1, AT1G73805.1, AT2G14210.1, AT2G19590.1, AT2G26560.1, AT2G41240.1, AT2G44840.1, AT2G47520.1, AT3G08860.1, AT3G25190.1, AT3G53280.1, AT3G56970.1, AT3G56980.1, AT4G12470.1, AT4G19690.2, AT4G31940.1, AT4G34410.1, AT5G04150.1, AT5G26920.1, AT5G36890.1, AT5G47220.1	AGL44, AT3G25190, AZI1, At2g19590, BGLU42, BHLH100, BHLH101, CBP60G, CYP71B5, CYP82C4, ERF11, ERF13, ERF2, ERF71, IRT1, PLA2A, PYD4, RRTF1, SARD1, bHLH38, bHLH39
GO.0002237	response to molecule of bacterial origin	3	0.00526	AT1G73805.1, AT1G80840.1, AT5G26920.1	CBP60G, SARD1, WRKY40
GO.0009267	cellular response to starvation	5	0.00763	AT2G19590.1, AT2G41240.1, AT3G56970.1, AT3G56980.1, AT5G04150.1	At2g19590, BHLH100, BHLH101, bHLH38, bHLH39
GO.0080142	regulation of salicylic acid biosynthetic process	2	0.00763	AT1G73805.1, AT5G26920.1	CBP60G, SARD1
GO.0001944	vasculature development	3	0.00874	AT1G28370.1, AT4G34410.1, AT5G47220.1	ERF11, ERF2, RRTF1
GO.0072358	cardiovascular system development	3	0.00874	AT1G28370.1, AT4G34410.1, AT5G47220.1	ERF11, ERF2, RRTF1
GO.0072359	circulatory system development	3	0.00874	AT1G28370.1, AT4G34410.1, AT5G47220.1	ERF11, ERF2, RRTF1
GO.0006810	transport	20	0.00883	AT1G01580.1, AT1G08090.1, AT1G17840.1, AT1G27950.1, AT1G56430.1, AT1G66950.1, AT2G16060.1, AT2G32270.1, AT3G22910.1, AT3G25190.1, AT3G43720.1, AT3G58060.1, AT3G58810.1, AT4G10310.1, AT4G13420.1, AT4G19680.2, AT4G19690.2, AT5G01600.1, AT5G13900.1, AT5G52860.1	ABCG11, ABCG39, ABCG8, AT3G22910, AT3G25190, AT3G58060, AT5G13900, FER1, FRO2, HAK5, HB1, HKT1, IRT1, IRT2, LTPG1, LTPG2, MTPA2, NAS4, NRT2:1, ZIP3
GO.0009626	plant-type hypersensitive response	4	0.00949	AT1G73805.1, AT2G26560.1, AT4G12470.1, AT5G26920.1	AZI1, CBP60G, PLA2A, SARD1
GO.0008150	biological_process	66	0.00999	AT1G01480.1, AT1G01580.1, AT1G08090.1, AT1G11920.1, AT1G12610.1, AT1G27950.1, AT1G28370.1, AT1G29930.1, AT1G34510.1, AT1G43800.1, AT1G60600.2, AT1G73805.1, AT1G76650.1, AT1G77120.1, AT1G80840.1, AT2G14210.1, AT2G26400.1, AT2G26560.1, AT2G29150.1, AT2G29460.1, AT2G30670.1, AT2G30750.1, AT2G32270.1, AT2G41240.1, AT2G44840.1, AT2G47520.1, AT3G02550.1, AT3G08860.1, AT3G16370.1, AT3G22910.1, AT3G25190…	ABC4, ABCG8, ACS2, ADH1, AGL44, ALDH3F1, ARD3, AT1G11920, AT1G34510, AT2G29150, AT2G30670, AT3G16370, AT3G22910, AT3G25190, AT3G27220, AT3G58060, AT4G28420, AT4G32950, AT4G33070, AT5G13900, AZI1, BHLH100, BHLH101, CAB1, CBP60G, CML37, CML38, CYP71A12, CYP71B22, CYP71B5, CYP82C4, DDF1, EARLI1, ERF11, ERF13, ERF2, ERF71, FER1, FRO2, FTM1, GSTU4, HAK5, HKT1, HSP17.4, HSP17.6A, IRT1, IRT2, LAS1, LBD4…
GO.0098655	cation transmembrane transport	8	0.00999	AT2G32270.1, AT3G22910.1, AT3G58060.1, AT3G58810.1, AT4G10310.1, AT4G13420.1, AT4G19680.2, AT4G19690.2	AT3G22910, AT3G58060, HAK5, HKT1, IRT1, IRT2, MTPA2, ZIP3
GO.0045088	regulation of innate immune response	4	0.0125	AT1G73805.1, AT3G26830.1, AT5G26920.1, AT5G47220.1	CBP60G, ERF2, PAD3, SARD1
GO.0008152	metabolic process	55	0.013	AT1G01480.1, AT1G01580.1, AT1G08090.1, AT1G11920.1, AT1G12610.1, AT1G17840.1, AT1G28370.1, AT1G29930.1, AT1G34510.1, AT1G43800.1, AT1G56430.1, AT1G60600.2, AT1G66950.1, AT1G73805.1, AT1G77120.1, AT1G80840.1, AT2G14210.1, AT2G19590.1, AT2G26400.1, AT2G26560.1, AT2G29150.1, AT2G29460.1, AT2G30670.1, AT2G30750.1, AT2G41240.1, AT2G44840.1, AT2G47520.1, AT3G08860.1, AT3G16370.1, AT3G22910.1, AT3G26200…	ABC4, ABCG11, ABCG39, ABCG8, ACS2, ADH1, AGL44, ALDH3F1, ARD3, AT1G11920, AT1G34510, AT2G29150, AT2G30670, AT3G16370, AT3G22910, AT3G27220, AT4G28420, AT4G32950, AT4G33070, At2g19590, BGLU42, BHLH100, BHLH101, CAB1, CBP60G, CYP71A12, CYP71B22, CYP71B5, CYP82C4, DDF1, ERF11, ERF13, ERF2, ERF71, FER1, FRO2, FTM1, GSTU4, HSP17.6A, LAS1, NAS4, NIT2, NRT2:1, NYC1, PAD3, PLA2A, PME44, PYD4, RRTF1, SARD…
GO.0034059	response to anoxia	2	0.0154	AT2G47520.1, AT4G33070.1	AT4G33070, ERF71
GO.0071219	cellular response to molecule of bacterial origin	2	0.0154	AT1G73805.1, AT5G26920.1	CBP60G, SARD1
GO.0070887	cellular response to chemical stimulus	14	0.0159	AT1G28370.1, AT2G14210.1, AT2G19590.1, AT2G26560.1, AT2G44840.1, AT2G47520.1, AT3G25190.1, AT3G53280.1, AT4G19690.2, AT4G31940.1, AT4G34410.1, AT5G26920.1, AT5G36890.1, AT5G47220.1	AGL44, AT3G25190, At2g19590, BGLU42, CBP60G, CYP71B5, CYP82C4, ERF11, ERF13, ERF2, ERF71, IRT1, PLA2A, RRTF1
GO.0072330	monocarboxylic acid biosynthetic process	6	0.0169	AT1G01480.1, AT1G43800.1, AT1G56430.1, AT2G26560.1, AT3G44300.1, AT5G26920.1	ACS2, CBP60G, FTM1, NAS4, NIT2, PLA2A
GO.0001101	response to acid chemical	12	0.018	AT1G08090.1, AT1G12610.1, AT1G17840.1, AT1G80840.1, AT2G14210.1, AT2G19590.1, AT2G41240.1, AT3G26830.1, AT4G12480.1, AT5G26920.1, AT5G42380.1, AT5G47220.1	ABCG11, AGL44, At2g19590, BHLH100, CBP60G, CML37, DDF1, EARLI1, ERF2, NRT2:1, PAD3, WRKY40
GO.0031347	regulation of defense response	5	0.018	AT1G73805.1, AT1G80840.1, AT3G26830.1, AT5G26920.1, AT5G47220.1	CBP60G, ERF2, PAD3, SARD1, WRKY40
GO.0009058	biosynthetic process	31	0.019	AT1G01480.1, AT1G12610.1, AT1G28370.1, AT1G43800.1, AT1G56430.1, AT1G60600.2, AT1G73805.1, AT1G80840.1, AT2G14210.1, AT2G19590.1, AT2G26400.1, AT2G26560.1, AT2G41240.1, AT2G44840.1, AT2G47520.1, AT3G08860.1, AT3G26200.1, AT3G26830.1, AT3G43190.1, AT3G44300.1, AT3G53280.1, AT3G56970.1, AT3G56980.1, AT4G28420.2, AT4G31940.1, AT4G34410.1, AT5G04150.1, AT5G24160.1, AT5G26920.1, AT5G47220.1, AT5G48010…	ABC4, ACS2, AGL44, ARD3, AT4G28420, At2g19590, BHLH100, BHLH101, CBP60G, CYP71B22, CYP71B5, CYP82C4, DDF1, ERF11, ERF13, ERF2, ERF71, FTM1, NAS4, NIT2, PAD3, PLA2A, PYD4, RRTF1, SARD1, SQE6, SUS4, THAS1, WRKY40, bHLH38, bHLH39
GO.0034220	ion transmembrane transport	9	0.0286	AT1G08090.1, AT2G32270.1, AT3G22910.1, AT3G58060.1, AT3G58810.1, AT4G10310.1, AT4G13420.1, AT4G19680.2, AT4G19690.2	AT3G22910, AT3G58060, HAK5, HKT1, IRT1, IRT2, MTPA2, NRT2:1, ZIP3
GO.0010033	response to organic substance	17	0.0309	AT1G17840.1, AT1G28370.1, AT1G73805.1, AT1G80840.1, AT2G19590.1, AT2G44840.1, AT2G47520.1, AT3G25190.1, AT3G26830.1, AT3G53280.1, AT4G12480.1, AT4G19690.2, AT4G34410.1, AT5G01600.1, AT5G26920.1, AT5G36890.1, AT5G47220.1	ABCG11, AT3G25190, At2g19590, BGLU42, CBP60G, CYP71B5, EARLI1, ERF11, ERF13, ERF2, ERF71, FER1, IRT1, PAD3, RRTF1, SARD1, WRKY40
GO.0010565	regulation of cellular ketone metabolic process	3	0.0309	AT1G12610.1, AT1G73805.1, AT5G26920.1	CBP60G, DDF1, SARD1
GO.0042742	defense response to bacterium	6	0.0351	AT1G73805.1, AT1G80840.1, AT4G12470.1, AT4G33220.1, AT5G26920.1, AT5G47220.1	AZI1, CBP60G, ERF2, PME44, SARD1, WRKY40
GO.1901701	cellular response to oxygen-containing compound	8	0.0381	AT2G14210.1, AT2G19590.1, AT3G25190.1, AT3G53280.1, AT4G19690.2, AT5G26920.1, AT5G36890.1, AT5G47220.1	AGL44, AT3G25190, At2g19590, BGLU42, CBP60G, CYP71B5, ERF2, IRT1
GO.0042335	cuticle development	2	0.0395	AT1G27950.1, AT3G43720.1	LTPG1, LTPG2
GO.0010200	response to chitin	4	0.0451	AT1G80840.1, AT2G44840.1, AT4G34410.1, AT5G47220.1	ERF13, ERF2, RRTF1, WRKY40
GO.0044550	secondary metabolite biosynthetic process	5	0.0451	AT3G26200.1, AT3G26830.1, AT3G53280.1, AT4G31940.1, AT5G24160.1	CYP71B22, CYP71B5, CYP82C4, PAD3, SQE6
GO.0002229	defense response to oomycetes	2	0.0453	AT1G73805.1, AT5G26920.1	CBP60G, SARD1
GO.0009987	cellular process	55	0.0453	AT1G01480.1, AT1G08090.1, AT1G12610.1, AT1G28370.1, AT1G29930.1, AT1G34510.1, AT1G43800.1, AT1G60600.2, AT1G66950.1, AT1G72970.1, AT1G73805.1, AT1G80840.1, AT2G14210.1, AT2G19590.1, AT2G26400.1, AT2G26560.1, AT2G29460.1, AT2G32270.1, AT2G41240.1, AT2G44840.1, AT2G47520.1, AT3G08860.1, AT3G22910.1, AT3G25190.1, AT3G26830.1, AT3G27220.1, AT3G43190.1, AT3G44300.1, AT3G53280.1, AT3G56970.1, AT3G56980…	ABC4, ABCG39, ACS2, AGL44, ALDH3F1, ARD3, AT1G34510, AT3G22910, AT3G25190, AT3G27220, AT3G58060, AT4G28420, AT4G32950, AT5G15120, AT5G39890, AZI1, At2g19590, BHLH100, BHLH101, CAB1, CBP60G, CYP71B5, CYP82C4, DDF1, ERF11, ERF13, ERF2, ERF71, FER1, FTM1, GSTU4, HAK5, HKT1, HSP17.6A, HTH, IRT1, IRT2, MTPA2, NIT2, NRT2:1, NYC1, PAD3, PLA2A, PME44, PYD4, RRTF1, SARD1, SUS4, THAS1, WRKY40, XTH12, XTH13…
GO.0098662	inorganic cation transmembrane transport	6	0.0453	AT2G32270.1, AT3G22910.1, AT4G10310.1, AT4G13420.1, AT4G19680.2, AT4G19690.2	AT3G22910, HAK5, HKT1, IRT1, IRT2, ZIP3
GO.0009873	ethylene-activated signaling pathway	5	0.046	AT1G28370.1, AT2G44840.1, AT2G47520.1, AT4G34410.1, AT5G47220.1	ERF11, ERF13, ERF2, ERF71, RRTF1
MF
#pathway ID	pathway description	observed gene count	false discovery rate	matching proteins in your network (IDs)	matching proteins in your network (labels)
GO.0003674	molecular_function	69	5.68e-05	AT1G01580.1, AT1G08090.1, AT1G11920.1, AT1G12610.1, AT1G27950.1, AT1G28370.1, AT1G29930.1, AT1G34510.1, AT1G43800.1, AT1G52120.1, AT1G56430.1, AT1G60600.2, AT1G66950.1, AT1G73805.1, AT1G76650.1, AT1G80840.1, AT2G14210.1, AT2G17730.2, AT2G19590.1, AT2G26400.1, AT2G26560.1, AT2G29150.1, AT2G29460.1, AT2G30670.1, AT2G30750.1, AT2G32270.1, AT2G41240.1, AT2G44840.1, AT2G47520.1, AT3G01830.1, AT3G08860…	ABC4, ABCG39, ABCG8, AGL44, ALDH3F1, ARD3, AT1G11920, AT1G34510, AT1G52120, AT2G29150, AT2G30670, AT3G01830, AT3G16370, AT3G22910, AT3G47480, AT3G58060, AT4G28420, AT4G32950, AT4G33070, AT5G13900, AT5G15120, AT5G39890, AZI1, At2g19590, BGLU42, BHLH100, BHLH101, CAB1, CBP60G, CML37, CML38, CYP71A12, CYP71B22, CYP71B5, CYP82C4, DDF1, ERF11, ERF13, ERF2, ERF71, FRO2, FTM1, GSTU4, HAK5, HKT1, HSP17.6…
GO.0016491	oxidoreductase activity	20	5.68e-05	AT1G01580.1, AT1G34510.1, AT1G43800.1, AT1G72970.1, AT1G77120.1, AT2G19590.1, AT2G26400.1, AT2G29150.1, AT2G30670.1, AT2G30750.1, AT3G26200.1, AT3G26830.1, AT3G53280.1, AT4G13250.1, AT4G31940.1, AT4G36250.1, AT5G01600.1, AT5G15120.1, AT5G24160.1, AT5G39890.1	ADH1, ALDH3F1, ARD3, AT1G34510, AT2G29150, AT2G30670, AT5G15120, AT5G39890, At2g19590, CYP71A12, CYP71B22, CYP71B5, CYP82C4, FER1, FRO2, FTM1, HTH, NYC1, PAD3, SQE6
GO.0005488	binding	52	0.00302	AT1G01480.1, AT1G01580.1, AT1G11920.1, AT1G12610.1, AT1G17840.1, AT1G27950.1, AT1G28370.1, AT1G29930.1, AT1G34510.1, AT1G43800.1, AT1G52120.1, AT1G66950.1, AT1G72970.1, AT1G73805.1, AT1G76650.1, AT1G77120.1, AT1G80840.1, AT2G14210.1, AT2G17730.2, AT2G19590.1, AT2G26400.1, AT2G30750.1, AT2G41240.1, AT2G44840.1, AT2G47520.1, AT3G01830.1, AT3G08860.1, AT3G22910.1, AT3G26200.1, AT3G26830.1, AT3G43720…	ABCG11, ABCG39, ABCG8, ACS2, ADH1, AGL44, ARD3, AT1G11920, AT1G34510, AT1G52120, AT3G01830, AT3G22910, AT3G47480, AT4G28420, AT4G32950, AT4G33070, AT5G13900, AT5G15120, AT5G39890, AZI1, At2g19590, BHLH100, BHLH101, CAB1, CBP60G, CML37, CML38, CYP71A12, CYP71B22, CYP71B5, CYP82C4, DDF1, ERF11, ERF13, ERF2, ERF71, FRO2, FTM1, HSP17.6A, HTH, LTPG1, LTPG2, MTPA2, NIP2, PAD3, PYD4, RRTF1, SARD1, SQE6,…
GO.0016705	oxidoreductase activity, acting on paired donors, with incorporation or reduction of molecular oxygen	8	0.0161	AT1G43800.1, AT2G19590.1, AT2G30750.1, AT3G26200.1, AT3G26830.1, AT3G53280.1, AT4G31940.1, AT5G24160.1	At2g19590, CYP71A12, CYP71B22, CYP71B5, CYP82C4, FTM1, PAD3, SQE6
GO.0046906	tetrapyrrole binding	8	0.0161	AT1G29930.1, AT1G34510.1, AT2G16060.1, AT2G30750.1, AT3G26200.1, AT3G26830.1, AT3G53280.1, AT4G31940.1	AT1G34510, CAB1, CYP71A12, CYP71B22, CYP71B5, CYP82C4, HB1, PAD3
GO.0005385	zinc ion transmembrane transporter activity	3	0.0228	AT2G32270.1, AT4G19680.2, AT4G19690.2	IRT1, IRT2, ZIP3
GO.0005506	iron ion binding	7	0.0234	AT2G16060.1, AT2G26400.1, AT2G30750.1, AT3G26200.1, AT3G26830.1, AT3G53280.1, AT4G31940.1	ARD3, CYP71A12, CYP71B22, CYP71B5, CYP82C4, HB1, PAD3
GO.0004497	monooxygenase activity	6	0.037	AT2G30750.1, AT3G26200.1, AT3G26830.1, AT3G53280.1, AT4G31940.1, AT5G24160.1	CYP71A12, CYP71B22, CYP71B5, CYP82C4, PAD3, SQE6
GO.0017172	cysteine dioxygenase activity	2	0.037	AT5G15120.1, AT5G39890.1	AT5G15120, AT5G39890
GO.0020037	heme binding	7	0.037	AT1G34510.1, AT2G16060.1, AT2G30750.1, AT3G26200.1, AT3G26830.1, AT3G53280.1, AT4G31940.1	AT1G34510, CYP71A12, CYP71B22, CYP71B5, CYP82C4, HB1, PAD3
GO.0046872	metal ion binding	25	0.037	AT1G01580.1, AT1G11920.1, AT1G29930.1, AT1G34510.1, AT1G43800.1, AT1G76650.1, AT1G77120.1, AT2G16060.1, AT2G17730.2, AT2G19590.1, AT2G26400.1, AT2G30750.1, AT3G01830.1, AT3G22910.1, AT3G26200.1, AT3G26830.1, AT3G47480.1, AT3G53280.1, AT3G58810.1, AT4G31940.1, AT4G32950.1, AT4G33070.1, AT5G15120.1, AT5G39890.1, AT5G42380.1	ADH1, ARD3, AT1G11920, AT1G34510, AT3G01830, AT3G22910, AT3G47480, AT4G32950, AT4G33070, AT5G15120, AT5G39890, At2g19590, CAB1, CML37, CML38, CYP71A12, CYP71B22, CYP71B5, CYP82C4, FRO2, FTM1, HB1, MTPA2, NIP2, PAD3
GO.0047800	cysteamine dioxygenase activity	2	0.037	AT5G15120.1, AT5G39890.1	AT5G15120, AT5G39890
GO.0016702	oxidoreductase activity, acting on single donors with incorporation of molecular oxygen, incorporation of two atoms of oxygen	3	0.0407	AT2G26400.1, AT5G15120.1, AT5G39890.1	ARD3, AT5G15120, AT5G39890
GO.0016709	oxidoreductase activity, acting on paired donors, with incorporation or reduction of molecular oxygen, NAD(P)H as one donor, and incorporation of one atom of oxygen	5	0.0462	AT3G26200.1, AT3G26830.1, AT3G53280.1, AT4G31940.1, AT5G24160.1	CYP71B22, CYP71B5, CYP82C4, PAD3, SQE6
GO.0080039	xyloglucan endotransglucosylase activity	2	0.0462	AT5G57530.1, AT5G57540.1	XTH12, XTH13
CC
#pathway ID	pathway description	observed gene count	false discovery rate	matching proteins in your network (IDs)	matching proteins in your network (labels)
GO.0005575	cellular_component	72	0.0114	AT1G01580.1, AT1G08090.1, AT1G12610.1, AT1G17840.1, AT1G27950.1, AT1G28370.1, AT1G29930.1, AT1G34510.1, AT1G43800.1, AT1G54970.1, AT1G60600.2, AT1G66950.1, AT1G72970.1, AT1G73805.1, AT1G76650.1, AT1G77120.1, AT1G80840.1, AT2G14210.1, AT2G16060.1, AT2G17730.2, AT2G20520.1, AT2G26400.1, AT2G26560.1, AT2G29460.1, AT2G30750.1, AT2G32270.1, AT2G41240.1, AT2G44840.1, AT2G47520.1, AT3G08860.1, AT3G16370…	ABC4, ABCG11, ABCG39, ABCG8, ADH1, AGL44, ALDH3F1, ARD3, AT1G34510, AT3G16370, AT3G22910, AT3G25190, AT3G27220, AT3G58060, AT4G33070, AT5G13900, AT5G15120, AT5G25260, AT5G39890, AZI1, BGLU42, BHLH100, BHLH101, CAB1, CBP60G, CML37, CML38, CYP71A12, CYP71B22, CYP71B5, CYP82C4, DDF1, EARLI1, ERF11, ERF13, ERF2, ERF71, FER1, FLA6, FRO2, FTM1, GSTU4, HAK5, HB1, HKT1, HSP17.4, HSP17.6A, HTH, IRT1, IRT2…
GO.0016020	membrane	40	0.0114	AT1G01580.1, AT1G08090.1, AT1G17840.1, AT1G27950.1, AT1G29930.1, AT1G43800.1, AT1G60600.2, AT1G66950.1, AT1G76650.1, AT1G77120.1, AT2G16060.1, AT2G17730.2, AT2G20520.1, AT2G26560.1, AT2G30750.1, AT2G32270.1, AT3G22910.1, AT3G25190.1, AT3G26200.1, AT3G26830.1, AT3G27220.1, AT3G43190.1, AT3G43720.1, AT3G44300.1, AT3G53280.1, AT3G58060.1, AT3G58810.1, AT4G10310.1, AT4G13250.1, AT4G13420.1, AT4G19680…	ABC4, ABCG11, ABCG39, ABCG8, ADH1, ALDH3F1, AT3G22910, AT3G25190, AT3G27220, AT3G58060, AT4G33070, AT5G13900, AT5G25260, CAB1, CML38, CYP71A12, CYP71B22, CYP71B5, CYP82C4, FER1, FLA6, FRO2, FTM1, HAK5, HB1, HKT1, IRT1, IRT2, LTPG1, LTPG2, MTPA2, NIP2, NIT2, NRT2:1, NYC1, PAD3, PLA2A, SQE6, SUS4, ZIP3
GO.0031224	intrinsic component of membrane	29	0.0239	AT1G01580.1, AT1G08090.1, AT1G17840.1, AT1G27950.1, AT1G29930.1, AT1G60600.2, AT1G66950.1, AT2G17730.2, AT2G20520.1, AT2G30750.1, AT2G32270.1, AT3G22910.1, AT3G25190.1, AT3G26200.1, AT3G26830.1, AT3G27220.1, AT3G43720.1, AT3G53280.1, AT3G58060.1, AT3G58810.1, AT4G10310.1, AT4G13250.1, AT4G13420.1, AT4G19680.2, AT4G19690.2, AT4G31940.1, AT5G13900.1, AT5G24160.1, AT5G52860.1	ABC4, ABCG11, ABCG39, ABCG8, AT3G22910, AT3G25190, AT3G27220, AT3G58060, AT5G13900, CAB1, CYP71A12, CYP71B22, CYP71B5, CYP82C4, FLA6, FRO2, HAK5, HKT1, IRT1, IRT2, LTPG1, LTPG2, MTPA2, NIP2, NRT2:1, NYC1, PAD3, SQE6, ZIP3
GO.0071944	cell periphery	24	0.0239	AT1G01580.1, AT1G08090.1, AT1G17840.1, AT1G27950.1, AT1G54970.1, AT1G66950.1, AT1G76650.1, AT1G77120.1, AT2G16060.1, AT2G20520.1, AT2G32270.1, AT3G43190.1, AT3G43720.1, AT3G44300.1, AT4G10310.1, AT4G12470.1, AT4G12480.1, AT4G13420.1, AT4G19680.2, AT4G19690.2, AT4G33220.1, AT5G25260.1, AT5G57530.1, AT5G57540.1	ABCG11, ABCG39, ADH1, AT5G25260, AZI1, CML38, EARLI1, FLA6, FRO2, HAK5, HB1, HKT1, IRT1, IRT2, LTPG1, LTPG2, NIT2, NRT2:1, PME44, PRP1, SUS4, XTH12, XTH13, ZIP3
GO.0044425	membrane part	30	0.0361	AT1G01580.1, AT1G08090.1, AT1G17840.1, AT1G27950.1, AT1G29930.1, AT1G60600.2, AT1G66950.1, AT2G17730.2, AT2G20520.1, AT2G30750.1, AT2G32270.1, AT3G22910.1, AT3G25190.1, AT3G26200.1, AT3G26830.1, AT3G27220.1, AT3G43720.1, AT3G53280.1, AT3G58060.1, AT3G58810.1, AT4G10310.1, AT4G13250.1, AT4G13420.1, AT4G19680.2, AT4G19690.2, AT4G31940.1, AT5G13900.1, AT5G24160.1, AT5G25260.1, AT5G52860.1	ABC4, ABCG11, ABCG39, ABCG8, AT3G22910, AT3G25190, AT3G27220, AT3G58060, AT5G13900, AT5G25260, CAB1, CYP71A12, CYP71B22, CYP71B5, CYP82C4, FLA6, FRO2, HAK5, HKT1, IRT1, IRT2, LTPG1, LTPG2, MTPA2, NIP2, NRT2:1, NYC1, PAD3, SQE6, ZIP3
GO.0005623	cell	61	0.0475	AT1G01580.1, AT1G08090.1, AT1G12610.1, AT1G17840.1, AT1G27950.1, AT1G28370.1, AT1G29930.1, AT1G43800.1, AT1G54970.1, AT1G60600.2, AT1G66950.1, AT1G73805.1, AT1G76650.1, AT1G77120.1, AT1G80840.1, AT2G14210.1, AT2G16060.1, AT2G17730.2, AT2G20520.1, AT2G26400.1, AT2G26560.1, AT2G29460.1, AT2G32270.1, AT2G41240.1, AT2G44840.1, AT2G47520.1, AT3G08860.1, AT3G25190.1, AT3G26830.1, AT3G27220.1, AT3G43190…	ABC4, ABCG11, ABCG39, ADH1, AGL44, ALDH3F1, ARD3, AT3G25190, AT3G27220, AT3G58060, AT4G33070, AT5G15120, AT5G25260, AT5G39890, AZI1, BGLU42, BHLH100, BHLH101, CAB1, CBP60G, CML37, CML38, DDF1, EARLI1, ERF11, ERF13, ERF2, ERF71, FER1, FLA6, FRO2, FTM1, GSTU4, HAK5, HB1, HKT1, HSP17.4, HSP17.6A, IRT1, IRT2, LTPG1, LTPG2, MTPA2, NIP2, NIT2, NRT2:1, NYC1, PAD3, PLA2A, PME44, PRP1, PYD4, RRTF1, SARD1,…
GO.0044464	cell part	61	0.0475	AT1G01580.1, AT1G08090.1, AT1G12610.1, AT1G17840.1, AT1G27950.1, AT1G28370.1, AT1G29930.1, AT1G43800.1, AT1G54970.1, AT1G60600.2, AT1G66950.1, AT1G73805.1, AT1G76650.1, AT1G77120.1, AT1G80840.1, AT2G14210.1, AT2G16060.1, AT2G17730.2, AT2G20520.1, AT2G26400.1, AT2G26560.1, AT2G29460.1, AT2G32270.1, AT2G41240.1, AT2G44840.1, AT2G47520.1, AT3G08860.1, AT3G25190.1, AT3G26830.1, AT3G27220.1, AT3G43190…	ABC4, ABCG11, ABCG39, ADH1, AGL44, ALDH3F1, ARD3, AT3G25190, AT3G27220, AT3G58060, AT4G33070, AT5G15120, AT5G25260, AT5G39890, AZI1, BGLU42, BHLH100, BHLH101, CAB1, CBP60G, CML37, CML38, DDF1, EARLI1, ERF11, ERF13, ERF2, ERF71, FER1, FLA6, FRO2, FTM1, GSTU4, HAK5, HB1, HKT1, HSP17.4, HSP17.6A, IRT1, IRT2, LTPG1, LTPG2, MTPA2, NIP2, NIT2, NRT2:1, NYC1, PAD3, PLA2A, PME44, PRP1, PYD4, RRTF1, SARD1,…
KEGG
#pathway ID	pathway description	observed gene count	false discovery rate	matching proteins in your network (IDs)	matching proteins in your network (labels)
1100	Metabolic pathways	30	1.44e-08	AT1G01480.1, AT1G29930.1, AT1G34510.1, AT1G60600.2, AT1G77120.1, AT2G19590.1, AT2G26400.1, AT2G29150.1, AT2G30670.1, AT2G30750.1, AT3G08860.1, AT3G26200.1, AT3G26830.1, AT3G43190.1, AT3G44300.1, AT3G45130.1, AT3G53280.1, AT4G12290.1, AT4G13250.1, AT4G28420.2, AT4G31940.1, AT4G33070.1, AT4G33220.1, AT4G36250.1, AT5G15120.1, AT5G24160.1, AT5G36890.1, AT5G39890.1, AT5G54270.1, AT5G57220.1	ABC4, ACS2, ADH1, ALDH3F1, ARD3, AT1G34510, AT2G29150, AT2G30670, AT4G12290, AT4G28420, AT4G33070, AT5G15120, AT5G39890, At2g19590, BGLU42, CAB1, CYP71A12, CYP71B22, CYP71B5, CYP81F2, CYP82C4, LAS1, LHCB3, NIT2, NYC1, PAD3, PME44, PYD4, SQE6, SUS4
[truncated: 11 more rows]

## Sheet: Table S5
Table S5. GO enrichment analysis of co-expression network genes (Fig. 5) in shoots as determined by STRING analysis.
BP
[truncated: 92 more rows]
